# Supplementary material for: High-entropy alloy screening for halide perovskites
Source: Royal Society of Chemistry journal article supplement (doi:10.1039/d4mh00464g), 2024-01-01
Supplement: d4mh00464g2.pdf [file d4mh00464g2.pdf]

Supplementary information for “High-entropy alloy screening for halide perovskites”

Christopher P. Muzzillo,<sup>1\*</sup> Cristian V. Ciobanu,<sup>2</sup> and David T. Moore<sup>1</sup>

1. National Renewable Energy Laboratory, Golden, CO, USA

2. Colorado School of Mines, Golden, CO, USA

\*Corresponding author email: christopher.muzzillo@nrel.gov

Table S1. Experimental III-V<sup>1-3</sup> and II-VI<sup>4-10</sup> room temperature single-phase alloy and multiple phase data, along with the ES term at 300 K, S/R, and UCV values calculated in this work, confirming how sorting by ES term and UCV creates a phase boundary that correctly separates 42 out of 45 alloys by their miscibility at 300 K (incorrect alloys are in red). UCV also correlates well with mixing enthalpy at 300 K (Fig. S1). The III-V line is in Fig. 1; the II-VI line is at UCV = 0.114.

| Alloy composition    | ES term (kJ/mol) | S/R  | UCV   | Exp. mixing enthalpy (kJ/mol) | Single phase? |
|----------------------|------------------|------|-------|-------------------------------|---------------|
| Al0.5Ga0.5As0.5P0.5  | -1.73            | 0.69 | 0.019 | -                             | Yes           |
| Al0.5In0.5As0.5P0.5  | -1.73            | 0.69 | 0.038 | -                             | No            |
| Ga0.5In0.5As0.5P0.5  | -1.73            | 0.69 | 0.038 | -                             | No            |
| Al0.5Ga0.5As0.5Sb0.5 | -1.73            | 0.69 | 0.040 | -                             | No            |
| Al0.5In0.5As0.5Sb0.5 | -1.73            | 0.69 | 0.048 | -                             | No            |
| Ga0.5In0.5As0.5Sb0.5 | -1.73            | 0.69 | 0.049 | -                             | No            |
| Al0.5Ga0.5P0.5Sb0.5  | -1.73            | 0.69 | 0.058 | -                             | No            |
| Ga0.5In0.5P0.5Sb0.5  | -1.73            | 0.69 | 0.063 | -                             | No            |
| Al0.5In0.5P0.5Sb0.5  | -1.73            | 0.69 | 0.063 | -                             | No            |
| Al0.5Ga0.5P          | -0.86            | 0.35 | 0     | 0                             | Yes           |
| Al0.5Ga0.5As         | -0.86            | 0.35 | 0.001 | 0                             | Yes           |
| Al0.5Ga0.5Sb         | -0.86            | 0.35 | 0.001 | 0                             | Yes           |
| InAs0.5P0.5          | -0.86            | 0.35 | 0.014 | 0.42                          | Yes           |
| GaAs0.5P0.5          | -0.86            | 0.35 | 0.018 | 0.42                          | Yes           |
| AlAs0.5P0.5          | -0.86            | 0.35 | 0.019 | 0.42                          | Yes           |
| Al0.5In0.5Sb         | -0.86            | 0.35 | 0.028 | 0.63                          | Yes           |
| Ga0.5In0.5Sb         | -0.86            | 0.35 | 0.030 | 1.99                          | Yes           |
| Al0.5In0.5As         | -0.86            | 0.35 | 0.032 | 2.62                          | No            |
| Ga0.5In0.5As         | -0.86            | 0.35 | 0.033 | 3.14                          | No            |
| InAs0.5Sb0.5         | -0.86            | 0.35 | 0.036 | 2.35                          | No            |
| Al0.5In0.5P          | -0.86            | 0.35 | 0.037 | 3.66                          | No            |
| Ga0.5In0.5P          | -0.86            | 0.35 | 0.037 | 3.66                          | No            |
| GaAs0.5Sb0.5         | -0.86            | 0.35 | 0.040 | 4.71                          | No            |
| AlAs0.5Sb0.5         | -0.86            | 0.35 | 0.040 | -                             | No            |
| InP0.5Sb0.5          | -0.86            | 0.35 | 0.050 | -                             | No            |
| GaP0.5Sb0.5          | -0.86            | 0.35 | 0.058 | -                             | No            |
| AlP0.5Sb0.5          | -0.86            | 0.35 | 0.059 | -                             | No            |
| Cd0.5Hg0.5Se         | -0.86            | 0.35 | 0.003 | -                             | Yes           |
| Cd0.5Hg0.5Te         | -0.86            | 0.35 | 0.005 | -                             | Yes           |
| Cd0.5Hg0.5S          | -0.86            | 0.35 | 0.008 | -                             | Yes           |
| HgS0.5Se0.5          | -0.86            | 0.35 | 0.059 | -                             | No            |
| CdS0.5Se0.5          | -0.86            | 0.35 | 0.063 | -                             | Yes           |
| ZnS0.5Se0.5          | -0.86            | 0.35 | 0.070 | -                             | Yes           |
| Hg0.5Zn0.5Te         | -0.86            | 0.35 | 0.085 | -                             | No            |
| Cd0.5Zn0.5Te         | -0.86            | 0.35 | 0.090 | -                             | Yes           |
| HgSe0.5Te0.5         | -0.86            | 0.35 | 0.090 | -                             | Yes           |
| CdSe0.5Te0.5         | -0.86            | 0.35 | 0.098 | -                             | Yes           |
| Cd0.5Zn0.5Se         | -0.86            | 0.35 | 0.102 | -                             | Yes           |
| Hg0.5Zn0.5Se         | -0.86            | 0.35 | 0.106 | -                             | No            |
| Cd0.5Zn0.5S          | -0.86            | 0.35 | 0.109 | -                             | Yes           |
| ZnSe0.5Te0.5         | -0.86            | 0.35 | 0.110 | -                             | Yes           |
| Hg0.5Zn0.5S          | -0.86            | 0.35 | 0.117 | -                             | No            |
| HgS0.5Te0.5          | -0.86            | 0.35 | 0.148 | -                             | No            |
| CdS0.5Te0.5          | -0.86            | 0.35 | 0.160 | 5.14                          | No            |
| ZnS0.5Te0.5          | -0.86            | 0.35 | 0.179 | 5.72                          | No            |

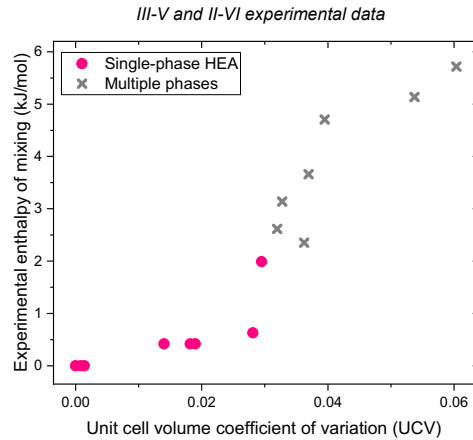

Fig. S1. Experimental III-V<sup>3</sup> and II-VI<sup>8</sup> enthalpy of mixing at 300 K as a function of UCV for single-phase alloy (pink circles) and multiple phase (gray Xs) data, showing that UCV predicts mixing enthalpy.

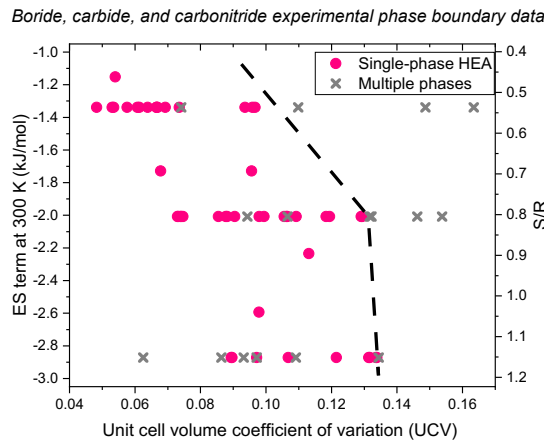

Fig. S2. Experimental boride, carbide, and carbonitride single-phase alloy (pink circles) and multiple phase (gray Xs) data,<sup>12</sup> confirming that plotting the ES term at 300 K (or S/R) as a function of UCV leads to a phase boundary (black dashed line) which correctly groups 56 of the 64 data.

Table S2. Ceramic unit cell volume (V): we use the median values of all Materials Project crystal structure entries.<sup>11</sup> Hermann-Mauguin space group, crystal system, and space group number are listed. Borides use the standard P6/mmm symmetry (3 atoms/unit cell; 1 formula unit/unit cell), while carbides and carbonitrides use the standard Fm-3m symmetry (8 atoms/unit cell; 4 formula units/unit cell).

| Ceramic crystal | V (Å <sup>3</sup> ) | Structure               |
|-----------------|---------------------|-------------------------|
| CrB2            | 23.50               | P6/mmm, hexagonal, 191  |
| VB2             | 23.78               | P6/mmm, hexagonal, 191  |
| MnB2            | 23.80               | P6/mmm, hexagonal, 191  |
| TiB2            | 25.67               | P6/mmm, hexagonal, 191  |
| WB2             | 26.74               | P63/mmc, hexagonal, 194 |
| TaB2            | 26.79               | P6/mmm, hexagonal, 191  |

|            |        |                        |
|------------|--------|------------------------|
| MoB2       | 27.41  | P6/mmm, hexagonal, 191 |
| NbB2       | 27.42  | P6/mmm, hexagonal, 191 |
| HfB2       | 29.72  | P6/mmm, hexagonal, 191 |
| ZrB2       | 30.70  | P6/mmm, hexagonal, 191 |
| YB2        | 36.00  | P6/mmm, hexagonal, 191 |
| CrC        | 65.21  | Fm-3m, cubic, 225      |
| VC         | 72.28  | Fm-3m, cubic, 225      |
| TiC        | 80.95  | Fm-3m, cubic, 225      |
| MoC        | 82.34  | Fm-3m, cubic, 225      |
| WC         | 83.00  | P-6m2, hexagonal, 187  |
| TaC        | 88.36  | Fm-3m, cubic, 225      |
| NbC        | 89.31  | Fm-3m, cubic, 225      |
| ScC        | 93.31  | Fm-3m, cubic, 225      |
| HfC        | 99.51  | Fm-3m, cubic, 225      |
| ZrC        | 103.36 | Fm-3m, cubic, 225      |
| CrC0.5N0.5 | 70.14  | Fm-3m, cubic, 225      |
| VC0.5N0.5  | 70.70  | Fm-3m, cubic, 225      |
| TiC0.5N0.5 | 78.37  | Fm-3m, cubic, 225      |
| MoC0.5N0.5 | 81.36  | P-6m2, hexagonal, 187  |
| WC0.5N0.5  | 81.99  | P-6m2, hexagonal, 187  |
| TaC0.5N0.5 | 85.71  | Fm-3m, cubic, 225      |
| NbC0.5N0.5 | 87.17  | Fm-3m, cubic, 225      |
| HfC0.5N0.5 | 95.54  | Fm-3m, cubic, 225      |
| ZrC0.5N0.5 | 99.67  | Fm-3m, cubic, 225      |

Table S3. Experimental boride, carbide, and carbonitride room temperature single-phase alloy and multiple phase data,<sup>12</sup> along with the ES term at 300 K, S/R, and UCV values calculated in this work, confirming how sorting by ES term and UCV creates a phase boundary that correctly separates 56 of the 64 alloys by their miscibility at 300 K (incorrect alloys are in red). The line is in Fig. S2.

| Alloy composition                 | ES term (kJ/mol) | S/R  | UCV   | Single phase? |
|-----------------------------------|------------------|------|-------|---------------|
| Hf0.2Mo0.2Nb0.2Ta0.2W0.2C0.5N0.5  | -2.87            | 1.15 | 0.062 | No            |
| Cr0.2Mo0.2Ta0.2V0.2W0.2C0.5N0.5   | -2.87            | 1.15 | 0.086 | No            |
| Hf0.2Nb0.2Ta0.2Ti0.2Zr0.2C0.5N0.5 | -2.87            | 1.15 | 0.089 | Yes           |
| Mo0.2Nb0.2Ta0.2Ti0.2Zr0.2C0.5N0.5 | -2.87            | 1.15 | 0.090 | Yes           |
| Mo0.2Nb0.2Ti0.2W0.2Zr0.2C0.5N0.5  | -2.87            | 1.15 | 0.093 | No            |
| Cr0.2Nb0.2Ta0.2Ti0.2V0.2C0.5N0.5  | -2.87            | 1.15 | 0.097 | Yes           |
| Hf0.2Ta0.2Ti0.2W0.2Zr0.2C0.5N0.5  | -2.87            | 1.15 | 0.097 | No            |
| Hf0.2Nb0.2Ta0.2Ti0.2V0.2C0.5N0.5  | -2.87            | 1.15 | 0.107 | Yes           |
| Cr0.2Hf0.2Nb0.2Ta0.2Ti0.2C0.5N0.5 | -2.87            | 1.15 | 0.109 | No            |
| Nb0.2Ta0.2Ti0.2V0.2Zr0.2C0.5N0.5  | -2.87            | 1.15 | 0.122 | Yes           |
| Hf0.2Nb0.2Ti0.2V0.2Zr0.2C0.5N0.5  | -2.87            | 1.15 | 0.131 | Yes           |
| Hf0.2Ta0.2Ti0.2V0.2Zr0.2C0.5N0.5  | -2.87            | 1.15 | 0.132 | Yes           |
| Cr0.2Hf0.2Nb0.2Ti0.2Zr0.2C0.5N0.5 | -2.87            | 1.15 | 0.134 | Yes           |
| Cr0.2Hf0.2Ta0.2Ti0.2Zr0.2C0.5N0.5 | -2.87            | 1.15 | 0.134 | Yes           |
| Hf0.2Ti0.2V0.2W0.2Zr0.2C0.5N0.5   | -2.87            | 1.15 | 0.134 | No            |
| Hf0.25Nb0.25Ti0.25Zr0.25C0.5N0.5  | -2.59            | 1.04 | 0.098 | Yes           |
| Hf0.33Ti0.33Zr0.33C0.5N0.5        | -2.23            | 0.90 | 0.113 | Yes           |
| Mo0.2Nb0.2Ta0.2V0.2W0.2C          | -2.01            | 0.80 | 0.073 | Yes           |
| Hf0.2Nb0.2Ta0.2Ti0.2W0.2C         | -2.01            | 0.80 | 0.073 | Yes           |
| Nb0.2Ta0.2Ti0.2V0.2W0.2C          | -2.01            | 0.80 | 0.074 | Yes           |
| Mo0.2Nb0.2Ta0.2Ti0.2V0.2C         | -2.01            | 0.80 | 0.074 | Yes           |
| Hf0.2Mo0.2Nb0.2Ta0.2Ti0.2C        | -2.01            | 0.80 | 0.075 | Yes           |
| Hf0.2Sc0.2Ta0.2Ti0.2Zr0.2C        | -2.01            | 0.80 | 0.085 | Yes           |
| Hf0.2Nb0.2Ta0.2Ti0.2Zr0.2C        | -2.01            | 0.80 | 0.088 | Yes           |
| Nb0.2Ta0.2Ti0.2W0.2Zr0.2C         | -2.01            | 0.80 | 0.088 | Yes           |
| Cr0.2Mo0.2Ti0.2V0.2W0.2C          | -2.01            | 0.80 | 0.090 | Yes           |
| Hf0.2Mo0.2Ta0.2W0.2Zr0.2C         | -2.01            | 0.80 | 0.094 | No            |
| Hf0.2Ta0.2Ti0.2W0.2Zr0.2C         | -2.01            | 0.80 | 0.098 | Yes           |
| Hf0.2Mo0.2Ta0.2Ti0.2Zr0.2C        | -2.01            | 0.80 | 0.099 | Yes           |
| Hf0.2Nb0.2Ta0.2Ti0.2V0.2C         | -2.01            | 0.80 | 0.106 | Yes           |
| Cr0.2Mo0.2Nb0.2Ta0.2W0.2C         | -2.01            | 0.80 | 0.106 | Yes           |
| Cr0.2Mo0.2Ta0.2V0.2W0.2C          | -2.01            | 0.80 | 0.107 | Yes           |
| Hf0.2Mo0.2Ti0.2W0.2Zr0.2C         | -2.01            | 0.80 | 0.107 | No            |
| Cr0.2Mo0.2Nb0.2V0.2W0.2C          | -2.01            | 0.80 | 0.109 | Yes           |

|                             |       |      |       |            |
|-----------------------------|-------|------|-------|------------|
| Nb0.2Ta0.2Ti0.2V0.2Zr0.2C   | -2.01 | 0.80 | 0.118 | Yes        |
| Hf0.2Nb0.2Ta0.2V0.2Zr0.2C   | -2.01 | 0.80 | 0.119 | Yes        |
| Hf0.2Nb0.2Ti0.2V0.2Zr0.2C   | -2.01 | 0.80 | 0.129 | Yes        |
| Hf0.2Ta0.2Ti0.2V0.2Zr0.2C   | -2.01 | 0.80 | 0.129 | Yes        |
| Hf0.2Mo0.2V0.2W0.2Zr0.2C    | -2.01 | 0.80 | 0.132 | No         |
| Cr0.2Hf0.2Mo0.2Ti0.2W0.2C   | -2.01 | 0.80 | 0.132 | No         |
| Cr0.2Mo0.2Ti0.2W0.2Zr0.2C   | -2.01 | 0.80 | 0.146 | No         |
| Cr0.2Hf0.2Ta0.2W0.2Zr0.2C   | -2.01 | 0.80 | 0.154 | No         |
| Hf0.25Nb0.25Ta0.25Zr0.25C   | -1.73 | 0.69 | 0.068 | Yes        |
| Hf0.25Ta0.25Ti0.25Zr0.25C   | -1.73 | 0.69 | 0.096 | Yes        |
| Hf0.2Mo0.2Nb0.2Ta0.2Ti0.2B2 | -1.34 | 0.54 | 0.048 | Yes        |
| Cr0.2Mo0.2Ta0.2Ti0.2W0.2B2  | -1.34 | 0.54 | 0.053 | Both (Yes) |
| Hf0.2Mo0.2Nb0.2Ta0.2Zr0.2B2 | -1.34 | 0.54 | 0.054 | Yes        |
| Hf0.2Nb0.2Ta0.2W0.2Zr0.2B2  | -1.34 | 0.54 | 0.058 | Both (Yes) |
| Mo0.2Nb0.2Ta0.2Ti0.2Zr0.2B2 | -1.34 | 0.54 | 0.061 | Yes        |
| Cr0.2Mo0.2Ti0.2V0.2W0.2B2   | -1.34 | 0.54 | 0.061 | Yes        |
| Hf0.2Mo0.2Nb0.2Ti0.2Zr0.2B2 | -1.34 | 0.54 | 0.064 | Both (Yes) |
| Hf0.2Nb0.2Ta0.2Ti0.2Zr0.2B2 | -1.34 | 0.54 | 0.067 | Yes        |
| Hf0.2Mo0.2Ta0.2Ti0.2Zr0.2B2 | -1.34 | 0.54 | 0.067 | Yes        |
| Hf0.2Mo0.2Ti0.2W0.2Zr0.2B2  | -1.34 | 0.54 | 0.067 | Both (Yes) |
| Hf0.2Ta0.2Ti0.2W0.2Zr0.2B2  | -1.34 | 0.54 | 0.069 | Yes        |
| Hf0.2Nb0.2Ta0.2Ti0.2V0.2B2  | -1.34 | 0.54 | 0.074 | Yes        |
| Cr0.2Hf0.2Mo0.2Ta0.2W0.2B2  | -1.34 | 0.54 | 0.074 | No         |
| Hf0.2Ta0.2Ti0.2V0.2Zr0.2B2  | -1.34 | 0.54 | 0.094 | Yes        |
| Cr0.2Hf0.2Nb0.2Ti0.2Zr0.2B2 | -1.34 | 0.54 | 0.096 | Yes        |
| Cr0.2Hf0.2Ta0.2Ti0.2Zr0.2B2 | -1.34 | 0.54 | 0.097 | Yes        |
| Hf0.2Mn0.2Ti0.2V0.2Zr0.2B2  | -1.34 | 0.54 | 0.110 | No         |
| Cr0.2Hf0.2Ti0.2Y0.2Zr0.2B2  | -1.34 | 0.54 | 0.149 | No         |
| Cr0.2Hf0.2Nb0.2V0.2Y0.2B2   | -1.34 | 0.54 | 0.163 | No         |
| Hf0.25Nb0.25Ta0.25Ti0.25B2  | -1.15 | 0.46 | 0.054 | Yes        |

Table S4. Experimentally observed inorganic HP single-phase alloys, along with the ES term at 300 K, S/R, and UCV values calculated in this work.

| Alloy composition                       | ES term<br>(kJ/mol) | S/R  | UCV   | Ref.             |
|-----------------------------------------|---------------------|------|-------|------------------|
| CsPbBrCl                                | -1.64               | 0.66 | 0.225 | 13               |
| CsPb0.33Sn0.33Sr0.33Br1.5I1.5           | -1.59               | 0.64 | 0.092 | 14               |
| CsGe0.33Pb0.33Sn0.33Br1.5I1.5           | -1.59               | 0.64 | 0.103 | 14               |
| CsMn0.33Pb0.33Sn0.33Br1.5I1.5           | -1.59               | 0.64 | 0.114 | 14               |
| CsPb0.33Sn0.33Zn0.33Br1.5I1.5           | -1.59               | 0.64 | -     | 14               |
| Cs0.5Rb0.5PbBr1.5Cl1.5                  | -1.38               | 0.55 | 0.028 | 15-16            |
| CsCa0.5Eu0.5Br1.5I1.5                   | -1.38               | 0.55 | 0.079 | 17               |
| CsCd0.5Mn0.5Br1.5Cl1.5                  | -1.38               | 0.55 | 0.081 | 18               |
| CsEu0.5Sr0.5Br1.5I1.5                   | -1.38               | 0.55 | 0.089 | 17               |
| Cs0.5Rb0.5PbBr1.5I1.5                   | -1.38               | 0.55 | 0.090 | 19-20            |
| CsPb0.5Sn0.5Br1.5I1.5                   | -1.38               | 0.55 | 0.094 | 21-26            |
| CsGe0.5Pb0.5Br1.5I1.5                   | -1.38               | 0.55 | 0.100 | 27               |
| CsFe0.5Pb0.5Br1.5Cl1.5                  | -1.38               | 0.55 | 0.140 | 28-29            |
| CsEu0.5Sr0.5Br1.5Cl1.5                  | -1.38               | 0.55 | 0.183 | 17               |
| CsPb0.5Zn0.5Br1.5Cl1.5                  | -1.38               | 0.55 | -     | 30               |
| CsPb0.5Zn0.5Br1.5I1.5                   | -1.38               | 0.55 | -     | 31               |
| K0.5Na0.5Co0.2Fe0.2Mg0.2Mn0.2Ni0.2F3    | -1.15               | 0.46 | 0.084 | 32               |
| CsPbBr1.5Cl1.5                          | -1.04               | 0.42 | 0.033 | 33-35            |
| CsSnBr1.5Cl1.5                          | -1.04               | 0.42 | 0.044 | 36-39            |
| CsGeBr1.5Cl1.5                          | -1.04               | 0.42 | 0.052 | 40-41            |
| CsCdBr1.5Cl1.5                          | -1.04               | 0.42 | 0.064 | 42               |
| CsCaBr1.5Cl1.5                          | -1.04               | 0.42 | 0.081 | 43               |
| K0.5Na0.5Co0.25Mn0.25Ni0.25Zn0.25F3     | -1.04               | 0.42 | 0.083 | 44               |
| CsPbBr1.5I1.5                           | -1.04               | 0.42 | 0.088 | 33-35, 39, 45-46 |
| CsCaBr1.5I1.5                           | -1.04               | 0.42 | 0.096 | 43               |
| CsSnBr1.5I1.5                           | -1.04               | 0.42 | 0.098 | 36-37, 39        |
| CsPbCl1.5I1.5                           | -1.04               | 0.42 | 0.120 | 33               |
| CsHgBr1.5Cl1.5                          | -1.04               | 0.42 | 0.158 | 47               |
| CsSnCl1.5I1.5                           | -1.04               | 0.42 | 0.165 | 39               |
| RbFeBr1.5Cl1.5                          | -1.04               | 0.42 | -     | 48-49            |
| TlPbBr1.5Cl1.5                          | -1.04               | 0.42 | -     | 50               |
| KCo0.17Fe0.17Mg0.17Mn0.17Ni0.17Zn0.17F3 | -0.89               | 0.36 | 0.049 | 51               |

|                               |       |      |       |                  |
|-------------------------------|-------|------|-------|------------------|
| K0.5Na0.5Co0.33Mn0.33Ni0.33F3 | -0.89 | 0.36 | 0.088 | 52               |
| KCo0.2Cu0.2Mg0.2Ni0.2Zn0.2F3  | -0.80 | 0.32 | 0.021 | 32               |
| NaCo0.2Fe0.2Mn0.2Ni0.2Zn0.2F3 | -0.80 | 0.32 | 0.042 | 32               |
| KCo0.2Fe0.2Mn0.2Ni0.2Zn0.2F3  | -0.80 | 0.32 | 0.046 | 32               |
| NaCo0.2Mg0.2Mn0.2Ni0.2Zn0.2F3 | -0.80 | 0.32 | 0.047 | 32               |
| NaCo0.2Fe0.2Mg0.2Mn0.2Ni0.2F3 | -0.80 | 0.32 | 0.049 | 32               |
| KCo0.2Mg0.2Mn0.2Ni0.2Zn0.2F3  | -0.80 | 0.32 | 0.053 | 32, 51           |
| KCo0.2Fe0.2Mg0.2Mn0.2Ni0.2F3  | -0.80 | 0.32 | 0.054 | 32, 53-54        |
| KCo0.25Mg0.25Ni0.25Zn0.25F3   | -0.69 | 0.28 | 0.022 | 51               |
| KCo0.25Fe0.25Ni0.25Zn0.25F3   | -0.69 | 0.28 | 0.026 | 51               |
| KCo0.25Fe0.25Mg0.25Zn0.25F3   | -0.69 | 0.28 | 0.030 | 51               |
| KCo0.25Fe0.25Mg0.25Ni0.25F3   | -0.69 | 0.28 | 0.032 | 51, 54           |
| KFe0.25Mg0.25Ni0.25Zn0.25F3   | -0.69 | 0.28 | 0.033 | 51               |
| KCo0.25Fe0.25Mn0.25Zn0.25F3   | -0.69 | 0.28 | 0.041 | 51               |
| KFe0.25Mn0.25Ni0.25Zn0.25F3   | -0.69 | 0.28 | 0.048 | 51               |
| KCo0.25Fe0.25Mn0.25Ni0.25F3   | -0.69 | 0.28 | 0.051 | 51, 54           |
| KCo0.25Mn0.25Ni0.25Zn0.25F3   | -0.69 | 0.28 | 0.051 | 51               |
| KFe0.25Mg0.25Mn0.25Zn0.25F3   | -0.69 | 0.28 | 0.052 | 51               |
| KCo0.25Mg0.25Mn0.25Zn0.25F3   | -0.69 | 0.28 | 0.054 | 51               |
| KCo0.25Fe0.25Mg0.25Mn0.25F3   | -0.69 | 0.28 | 0.054 | 51, 54           |
| KMg0.25Mn0.25Ni0.25Zn0.25F3   | -0.69 | 0.28 | 0.058 | 51               |
| KCo0.25Mg0.25Mn0.25Ni0.25F3   | -0.69 | 0.28 | 0.059 | 51, 54           |
| KFe0.25Mg0.25Mn0.25Ni0.25F3   | -0.69 | 0.28 | 0.059 | 51, 54           |
| KCo0.33Ni0.33Zn0.33F3         | -0.55 | 0.22 | 0.019 | 55               |
| KMn0.33Ni0.33Zn0.33F3         | -0.55 | 0.22 | 0.056 | 56-57            |
| KCo0.33Mn0.33Ni0.33F3         | -0.55 | 0.22 | 0.059 | 58-64            |
| CsMn0.33Ni0.33Pb0.33Br3       | -0.55 | 0.22 | 0.089 | 65               |
| Cs0.5Rb0.5GeBr3               | -0.35 | 0.14 | 0.001 | 41               |
| Cs0.5Rb0.5PbCl3               | -0.35 | 0.14 | 0.003 | 15, 66-67        |
| CsCd0.5Mn0.5Br3               | -0.35 | 0.14 | 0.004 | 68               |
| RbCa0.5Cd0.5F3                | -0.35 | 0.14 | 0.005 | 69-70            |
| KCu0.5Mg0.5F3                 | -0.35 | 0.14 | 0.006 | 71-72            |
| KMg0.5Ni0.5F3                 | -0.35 | 0.14 | 0.006 | 32, 73           |
| CsPb0.5Sn0.5Br3               | -0.35 | 0.14 | 0.006 | 74-75            |
| KCo0.5Zn0.5F3                 | -0.35 | 0.14 | 0.010 | 32, 55           |
| K0.5Ti0.5CuCl3                | -0.35 | 0.14 | 0.011 | 76-78            |
| K0.5Rb0.5SrCl3                | -0.35 | 0.14 | 0.011 | 79               |
| Cs0.5Rb0.5CaCl3               | -0.35 | 0.14 | 0.012 | 80-82            |
| KFe0.5Zn0.5F3                 | -0.35 | 0.14 | 0.012 | 32               |
| Cs0.5K0.5PbBr3                | -0.35 | 0.14 | 0.013 | 83-84            |
| KCo0.5Ni0.5F3                 | -0.35 | 0.14 | 0.013 | 32, 55           |
| CsPb0.5Sr0.5Cl3               | -0.35 | 0.14 | 0.014 | 85               |
| CsCo0.5Mn0.5F3                | -0.35 | 0.14 | 0.015 | 86               |
| CsMn0.5Ni0.5F3                | -0.35 | 0.14 | 0.016 | 86               |
| CsPb0.5Sn0.5I3                | -0.35 | 0.14 | 0.017 | 39, 87-89        |
| KCo0.5Mg0.5F3                 | -0.35 | 0.14 | 0.019 | 32               |
| K0.5Rb0.5MnF3                 | -0.35 | 0.14 | 0.020 | 90-92            |
| Cs0.5Rb0.5PbBr3               | -0.35 | 0.14 | 0.021 | 15, 66-67, 93-94 |
| Cs0.5Rb0.5CaF3                | -0.35 | 0.14 | 0.021 | 69, 95           |
| KNi0.5Zn0.5F3                 | -0.35 | 0.14 | 0.023 | 32, 55           |
| CsCa0.5Pb0.5Br3               | -0.35 | 0.14 | 0.023 | 96               |
| CsPb0.5Sr0.5Br3               | -0.35 | 0.14 | 0.024 | 85, 96-97        |
| K0.5Rb0.5NiCl3                | -0.35 | 0.14 | 0.024 | 98               |
| KMg0.5Zn0.5F3                 | -0.35 | 0.14 | 0.029 | 32               |
| Cs0.5Rb0.5SnBr3               | -0.35 | 0.14 | 0.031 | 99               |
| K0.5Rb0.5CaF3                 | -0.35 | 0.14 | 0.031 | 100-101          |
| Cs0.5Rb0.5CaBr3               | -0.35 | 0.14 | 0.031 | 102-103          |
| KFe0.5Mn0.5F3                 | -0.35 | 0.14 | 0.032 | 32               |
| K0.5Rb0.5CdF3                 | -0.35 | 0.14 | 0.032 | 104              |
| CsCd0.5Mn0.5Cl3               | -0.35 | 0.14 | 0.033 | 105-107          |
| CsGe0.5Mn0.5I3                | -0.35 | 0.14 | 0.033 | 108              |
| K0.5Rb0.5MnF3                 | -0.35 | 0.14 | 0.038 | 90, 109          |
| RbCo0.5Mg0.5F3                | -0.35 | 0.14 | 0.044 | 110              |
| CsGe0.5Sn0.5I3                | -0.35 | 0.14 | 0.046 | 89, 111          |
| CsGe0.5Sn0.5Br3               | -0.35 | 0.14 | 0.047 | 112              |
| CsGe0.5Mn0.5Br3               | -0.35 | 0.14 | 0.048 | 108              |
| Cs0.5Rb0.5MnF3                | -0.35 | 0.14 | 0.052 | 91               |
| CsMg0.5Pb0.5I3                | -0.35 | 0.14 | 0.052 | 113              |
| Cs0.5K0.5CaCl3                | -0.35 | 0.14 | 0.053 | 80               |
| KCo0.5Mn0.5F3                 | -0.35 | 0.14 | 0.053 | 114-116          |

|                 |       |      |       |         |
|-----------------|-------|------|-------|---------|
| K0.5Na0.5MgF3   | -0.35 | 0.14 | 0.058 | 117-120 |
| Cs0.5Rb0.5CoF3  | -0.35 | 0.14 | 0.059 | 121     |
| CsMn0.5Pb0.5I3  | -0.35 | 0.14 | 0.062 | 122     |
| CsCd0.5Pb0.5Br3 | -0.35 | 0.14 | 0.062 | 123-124 |
| CsHg0.5Ti0.5Cl3 | -0.35 | 0.14 | 0.066 | 125     |
| CsMn0.5Pb0.5Br3 | -0.35 | 0.14 | 0.066 | 126-127 |
| KMn0.5Ni0.5F3   | -0.35 | 0.14 | 0.067 | 128-130 |
| Cs0.5Rb0.5FeCl3 | -0.35 | 0.14 | 0.070 | 131     |
| K0.5Na0.5MnF3   | -0.35 | 0.14 | 0.072 | 132-134 |
| Cs0.5K0.5MnF3   | -0.35 | 0.14 | 0.072 | 91      |
| KMg0.5Mn0.5F3   | -0.35 | 0.14 | 0.072 | 135     |
| CsMg0.5Mn0.5F3  | -0.35 | 0.14 | 0.073 | 86      |
| CsAg0.5Au0.5Cl3 | -0.35 | 0.14 | 0.081 | 136     |
| KCa0.5Mg0.5Cl3  | -0.35 | 0.14 | 0.082 | 137     |
| K0.5Rb0.5CaF3   | -0.35 | 0.14 | 0.084 | 138-141 |
| CsPb0.5Ti0.5Br3 | -0.35 | 0.14 | 0.085 | 142     |
| K0.5Rb0.5CaCl3  | -0.35 | 0.14 | 0.089 | 137     |
| Cs0.5K0.5CaCl3  | -0.35 | 0.14 | 0.089 | 137     |
| CsMn0.5Sn0.5Cl3 | -0.35 | 0.14 | 0.097 | 143     |
| KCa0.5Mg0.5F3   | -0.35 | 0.14 | 0.101 | 118     |
| CsCo0.5Mg0.5Cl3 | -0.35 | 0.14 | 0.117 | 144-145 |
| CsBa0.5Pb0.5Br3 | -0.35 | 0.14 | 0.117 | 96, 146 |
| Cs0.5Rb0.5CaCl3 | -0.35 | 0.14 | 0.125 | 137     |
| CsMn0.5Pb0.5Cl3 | -0.35 | 0.14 | 0.126 | 147     |
| Rb0.5Ti0.5PbCl3 | -0.35 | 0.14 | 0.131 | 50      |
| CsEu0.5Ni0.5Cl3 | -0.35 | 0.14 | 0.133 | 148     |
| CsFe0.5Pb0.5Cl3 | -0.35 | 0.14 | 0.139 | 149     |
| CsCa0.5Sr0.5Cl3 | -0.35 | 0.14 | 0.156 | 79      |
| RbCo0.5Ni0.5F3  | -0.35 | 0.14 | 0.180 | 150     |
| CsPb0.5Zn0.5Cl3 | -0.35 | 0.14 | 0.235 | 30, 151 |
| CsCo0.5Mg0.5Br3 | -0.35 | 0.14 | -     | 152-154 |
| CsPb0.5Ce0.5Br3 | -0.35 | 0.14 | -     | 155     |
| CsPb0.5Zn0.5Br3 | -0.35 | 0.14 | -     | 156-158 |
| CsPb0.5Zn0.5I3  | -0.35 | 0.14 | -     | 159     |
| KCa0.5Sr0.5I3   | -0.35 | 0.14 | -     | 160-161 |

Table S5. Experimentally observed hybrid organic-inorganic HP single-phase alloys, along with the ES term at 300 K, S/R, and UCV values calculated in this work.

| Alloy composition              | ES term<br>(kJ/mol) | S/R  | UCV   | Ref.     |
|--------------------------------|---------------------|------|-------|----------|
| MAPbBrClI                      | -1.64               | 0.66 | 0.134 | 162      |
| Cs0.33FA0.33Rb0.33PbBr1.5Cl1.5 | -1.59               | 0.64 | 0.049 | 163      |
| Cs0.33FA0.33MA0.33PbBr1.5Cl1.5 | -1.59               | 0.64 | 0.056 | 164      |
| Cs0.33FA0.33MA0.33PbBr1.5I1.5  | -1.59               | 0.64 | 0.096 | 164-166  |
| ACA0.33Cs0.33FA0.33PbBr1.5I1.5 | -1.59               | 0.64 | -     | 167      |
| Cs0.33DMA0.33FA0.33PbBr1.5I1.5 | -1.59               | 0.64 | -     | 167      |
| Cs0.33GA0.33FA0.33PbBr1.5I1.5  | -1.59               | 0.64 | -     | 167      |
| Cs0.5FA0.5PbBr1.5Cl1.5         | -1.38               | 0.55 | 0.051 | 168      |
| FA0.5MA0.5SnBr1.5I1.5          | -1.38               | 0.55 | 0.079 | 169      |
| Cs0.5FA0.5SnBr1.5I1.5          | -1.38               | 0.55 | 0.085 | 169      |
| FA0.5MA0.5PbBr1.5I1.5          | -1.38               | 0.55 | 0.093 | 170      |
| Cs0.5FA0.5PbBr1.5I1.5          | -1.38               | 0.55 | 0.095 | 171      |
| Cs0.5NH40.5PbBr1.5Cl1.5        | -1.38               | 0.55 | -     | 172      |
| Cs0.5NH40.5PbBr1.5I1.5         | -1.38               | 0.55 | -     | 173      |
| EA0.5MA0.5PbBr1.5I1.5          | -1.38               | 0.55 | -     | 174      |
| GA0.5MA0.5PbBr1.5I1.5          | -1.38               | 0.55 | -     | 175      |
| IM0.5MA0.5PbCl1.5I1.5          | -1.38               | 0.55 | -     | 176      |
| MACd0.5Pb0.5Br1.5I1.5          | -1.38               | 0.55 | -     | 177      |
| MACo0.5Pb0.5Br1.5Cl1.5         | -1.38               | 0.55 | -     | 178      |
| MAMn0.5Pb0.5Br1.5Cl1.5         | -1.38               | 0.55 | -     | 179      |
| MAPbBr1.5Cl1.5                 | -1.04               | 0.42 | 0.064 | 180-182  |
| MASnBr1.5I1.5                  | -1.04               | 0.42 | 0.084 | 183      |
| FAPbBr1.5I1.5                  | -1.04               | 0.42 | 0.088 | 184      |
| MAPbBr1.5I1.5                  | -1.04               | 0.42 | 0.097 | 183, 185 |
| Cs0.33FA0.33MA0.33Pb0.5Sn0.5I3 | -0.89               | 0.36 | 0.024 | 183, 186 |
| Cs0.33FA0.33Rb0.33Pb0.5Sn0.5I3 | -0.89               | 0.36 | 0.050 | 187      |
| Cs0.33FA0.33GA0.33Pb0.5Sn0.5I3 | -0.89               | 0.36 | -     | 183      |

|                         |       |      |       |              |
|-------------------------|-------|------|-------|--------------|
| Cs0.5MA0.5Pb0.5Sn0.5I3  | -0.69 | 0.28 | 0.021 | 183          |
| FA0.5MA0.5Pb0.5Sn0.5I3  | -0.69 | 0.28 | 0.021 | 183, 188     |
| Cs0.5FA0.5Pb0.5Sn0.5I3  | -0.69 | 0.28 | 0.025 | 183, 189-190 |
| Cs0.5GA0.5Ge0.5Pb0.5I3  | -0.69 | 0.28 | -     | 191          |
| FA0.5MA0.5Ba0.5Pb0.5I3  | -0.69 | 0.28 | -     | 192          |
| GA0.5MA0.5Pb0.5Sn0.5I3  | -0.69 | 0.28 | -     | 183          |
| Cs0.33FA0.33MA0.33PbCl3 | -0.55 | 0.22 | 0.025 | 164          |
| Cs0.33FA0.33MA0.33PbBr3 | -0.55 | 0.22 | 0.029 | 164          |
| Cs0.33FA0.33MA0.33PbI3  | -0.55 | 0.22 | 0.030 | 164-165      |
| Cs0.33FA0.33Rb0.33PbBr3 | -0.55 | 0.22 | 0.047 | 163          |
| FA0.33MA0.33Rb0.33PbI3  | -0.55 | 0.22 | 0.050 | 193          |
| Cs0.33DMA0.33MA0.33PbI3 | -0.55 | 0.22 | 0.050 | 194          |
| FA0.33K0.33MA0.33PbI3   | -0.55 | 0.22 | 0.068 | 195          |
| EA0.33GA0.33MA0.33PbI3  | -0.55 | 0.22 | -     | 196          |
| FA0.33GA0.33MA0.33PbI3  | -0.55 | 0.22 | -     | 197-199      |
| GA0.33MA0.33Rb0.33PbI3  | -0.55 | 0.22 | -     | 196          |
| MAPb0.33Sn0.33Zn0.33I3  | -0.55 | 0.22 | -     | 200          |
| Cs0.5FA0.5SnI3          | -0.35 | 0.14 | 0.007 | 189          |
| FA0.5MA0.5PbI3          | -0.35 | 0.14 | 0.008 | 201-203      |
| MAPb0.5Sn0.5Br3         | -0.35 | 0.14 | 0.008 | 183, 204     |
| FAPb0.5Sn0.5I3          | -0.35 | 0.14 | 0.011 | 183, 205     |
| Cs0.5MA0.5GeI3          | -0.35 | 0.14 | 0.012 | 206          |
| Cs0.5MA0.5PbCl3         | -0.35 | 0.14 | 0.013 | 207          |
| FA0.5MA0.5PbBr3         | -0.35 | 0.14 | 0.017 | 164          |
| Cs0.5MA0.5PbBr3         | -0.35 | 0.14 | 0.018 | 207          |
| FAGe0.5Sn0.5I3          | -0.35 | 0.14 | 0.019 | 208          |
| MAPb0.5Sn0.5I3          | -0.35 | 0.14 | 0.021 | 183, 209-210 |
| Cs0.5MA0.5PbI3          | -0.35 | 0.14 | 0.027 | 203          |
| K0.5MA0.5PbBr3          | -0.35 | 0.14 | 0.031 | 211          |
| DMA0.5MA0.5PbI3         | -0.35 | 0.14 | 0.034 | 212          |
| Cs0.5FA0.5PbI3          | -0.35 | 0.14 | 0.035 | 203, 213     |
| Cs0.5FA0.5PbBr3         | -0.35 | 0.14 | 0.035 | 214          |
| FA0.5MA0.5SnBr3         | -0.35 | 0.14 | 0.039 | 215          |
| MAGe0.5Sn0.5I3          | -0.35 | 0.14 | 0.047 | 216          |
| FA0.5Rb0.5PbI3          | -0.35 | 0.14 | 0.057 | 193          |
| DMA0.5MA0.5SnBr3        | -0.35 | 0.14 | -     | 215          |
| FA0.5MA0.5GeBr3         | -0.35 | 0.14 | -     | 217          |
| FACd0.5Pb0.5Br3         | -0.35 | 0.14 | -     | 218          |
| FAGe0.5Sn0.5Br3         | -0.35 | 0.14 | -     | 217          |
| FAMn0.5Pb0.5Br3         | -0.35 | 0.14 | -     | 179          |
| GA0.5MA0.5PbI3          | -0.35 | 0.14 | -     | 219          |
| MA0.5NH40.5PbBr3        | -0.35 | 0.14 | -     | 220          |
| MACd0.5Pb0.5Br3         | -0.35 | 0.14 | -     | 221          |
| MACo0.5Pb0.5I3          | -0.35 | 0.14 | -     | 222          |
| MAFe0.5Pb0.5I3          | -0.35 | 0.14 | -     | 222          |
| MAMg0.5Pb0.5I3          | -0.35 | 0.14 | -     | 222          |
| MAMn0.5Pb0.5Br3         | -0.35 | 0.14 | -     | 179          |
| MAMn0.5Pb0.5I3          | -0.35 | 0.14 | -     | 222          |
| MANi0.5Pb0.5I3          | -0.35 | 0.14 | -     | 222          |
| MAPb0.5Sr0.5I3          | -0.35 | 0.14 | -     | 222          |
| MAPb0.5Zn0.5Br3         | -0.35 | 0.14 | -     | 223-224      |
| MAPb0.5Zn0.5I3          | -0.35 | 0.14 | -     | 225          |
| NH4Mn0.5Zn0.5F3         | -0.35 | 0.14 | -     | 226          |

Table S6. DFT HEAHP composition, along with the ES term at 300 K, S/R, UCV from Table S10, UCV from DFT, mean unit cell volume from Table S10, mean unit cell volume from DFT, and DFT mixing enthalpy, confirming that UCV correlates with DFT mixing enthalpy for HEAHP.

| Alloy composition                            | ES term (kJ/mol) | S/R  | UCV (Table S10) | UCV (DFT) | $\bar{V}$ (Table S10) (Å) | $\bar{V}$ (DFT) (Å) | DFT mixing enthalpy (kJ/mol) |
|----------------------------------------------|------------------|------|-----------------|-----------|---------------------------|---------------------|------------------------------|
| Cs0.5Rb0.5Ca0.25Ge0.25Pb0.25Sn0.25Br1.5Cl1.5 | -2.07            | 0.83 | 0.068           | 0.108     | 729.5                     | 729.6               | 3.70                         |
| Cs0.5Rb0.5Ca0.25Ge0.25Pb0.25Sn0.25Br1.5I1.5  | -2.07            | 0.83 | 0.102           | 0.125     | 838.7                     | 874.0               | -2.23                        |
| Cs0.5Rb0.5Ca0.25Ge0.25Pb0.25Sn0.25Cl1.5I1.5  | -2.07            | 0.83 | 0.146           | 0.191     | 804.3                     | 819.8               | 15.2                         |
| Cs0.5Rb0.5Ca0.25Ge0.25Pb0.25Sn0.25I3         | -1.04            | 0.42 | 0.053           | 0.068     | 913.5                     | 964.2               | -5.65                        |

|                                                                                                                                 |       |      |       |       |       |       |       |
|---------------------------------------------------------------------------------------------------------------------------------|-------|------|-------|-------|-------|-------|-------|
| Cs <sub>0.5</sub> Rb <sub>0.5</sub> Ca <sub>0.25</sub> Ge <sub>0.25</sub> Pb <sub>0.25</sub> Sn <sub>0.25</sub> Br <sub>3</sub> | -1.04 | 0.42 | 0.040 | 0.075 | 763.9 | 783.8 | -2.78 |
| Cs <sub>0.5</sub> Rb <sub>0.5</sub> Ca <sub>0.25</sub> Ge <sub>0.25</sub> Pb <sub>0.25</sub> Sn <sub>0.25</sub> Cl <sub>3</sub> | -1.04 | 0.42 | 0.057 | 0.081 | 695.2 | 675.4 | -3.33 |

Table S7. All 1,340,752 equimolar inorganic HEAHP with experimentally-observed end-members and 5 or more components: alloy composition, ES term at 300 K (kJ/mol), UCV, mean unit cell volume ( $\text{\AA}^3$ ), and mean band gap (eV). NA means not available. The table is included as a supplementary tab-separated value text file: "TableS7.txt".

Table S8. All 14,270 equimolar hybrid organic-inorganic HEAHP with experimentally-observed end-members and 5 or more components: alloy composition, ES term at 300 K (kJ/mol), UCV, mean unit cell volume ( $\text{\AA}^3$ ), and mean band gap (eV). NA means not available. The table is included as a supplementary tab-separated value text file: "TableS8.txt".

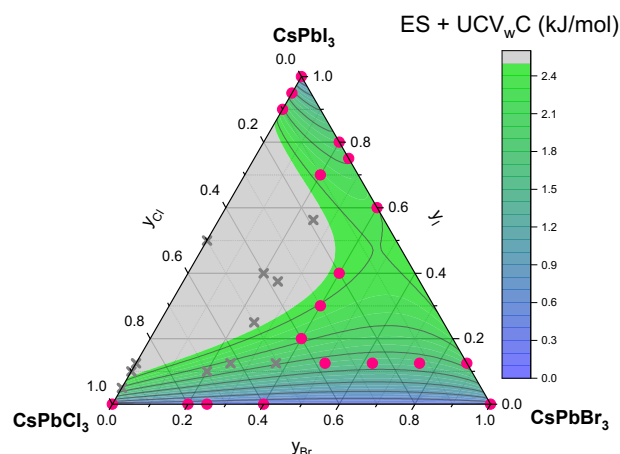

Fig. S3. ES +  $UCV_wC$  contours for CsPb(Br,Cl,I)<sub>3</sub>. Experimental HP single-phase alloy (pink circles) and multiple phase (gray Xs) data are overlaid,<sup>13</sup> confirming that  $C = 40$  kJ/mol leads to a phase boundary at  $G_{ES} = 2.5$  kJ/mol that correctly groups 23 of the 27 data (85%).

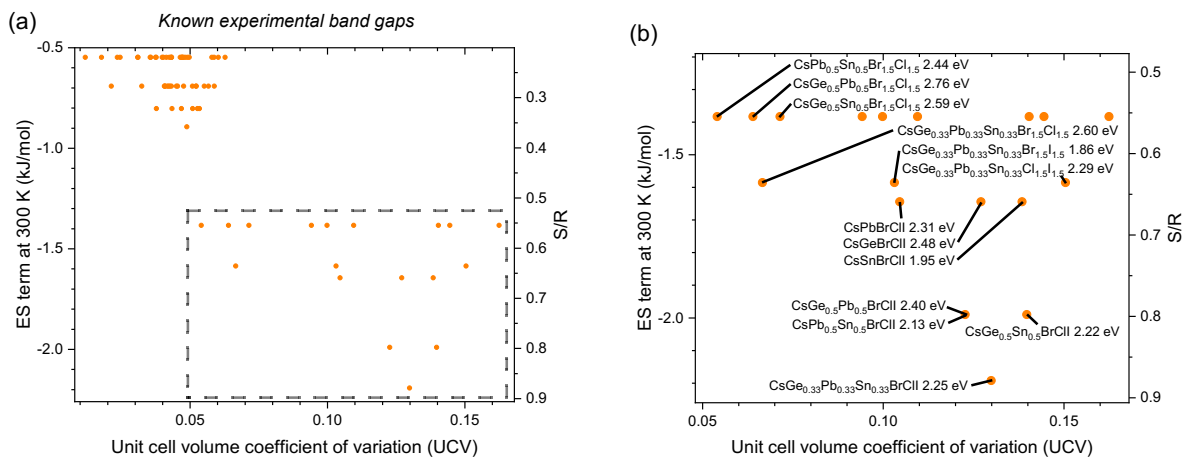



Fig. S4. Entropy stabilization (ES term at 300 K) as a function of enthalpic penalty (unit cell volume coefficient of variation (UCV)), for equimolar inorganic HP compositions with experimentally observed constitutive end-members and known experimental band gaps: (a) all data and (b) zoomed in, with promising alloys labeled.

Table S9. Inorganic HP compositions whose band gaps are known and end-members are all experimentally observed, with the maximum experimental band gap bowing (the difference between the linearly-interpolated-band gap and the actual band gap) and references.

| Alloy composition                         | ES term (kJ/mol) | S/R  | UCV   | Band gap (eV) | Exp. bowing (eV)                               |
|-------------------------------------------|------------------|------|-------|---------------|------------------------------------------------|
|                                           |                  |      |       |               | Cs(Pb,Sn)Br <sub>3</sub> ≤ 0.14 <sup>74</sup>  |
|                                           |                  |      |       |               | Cs(Ge,Sn)Br <sub>3</sub> ≤ 0.16 <sup>112</sup> |
|                                           |                  |      |       |               | Cs(Pb,Sn)I <sub>3</sub> ≤ 0.07 <sup>183</sup>  |
| CsGe0.33Pb0.33Sn0.33BrClI                 | -2.19            | 0.88 | 0.130 | 2.25          | CsGe(Br,Cl) <sub>3</sub> ≤ 0.49 <sup>40</sup>  |
| CsGe0.5Pb0.5BrClI                         | -1.99            | 0.80 | 0.123 | 2.40          | CsGe(Br,Cl) <sub>3</sub> ≤ 0.49 <sup>40</sup>  |
|                                           |                  |      |       |               | Cs(Pb,Sn)Br <sub>3</sub> ≤ 0.14 <sup>74</sup>  |
| CsPb0.5Sn0.5BrClI                         | -1.99            | 0.80 | 0.123 | 2.13          | Cs(Pb,Sn)I <sub>3</sub> ≤ 0.07 <sup>183</sup>  |
|                                           |                  |      |       |               | Cs(Ge,Sn)Br <sub>3</sub> ≤ 0.16 <sup>112</sup> |
| CsGe0.5Sn0.5BrClI                         | -1.99            | 0.80 | 0.140 | 2.22          | CsGe(Br,Cl) <sub>3</sub> ≤ 0.49 <sup>40</sup>  |
| CsPbBrClI                                 | -1.64            | 0.66 | 0.105 | 2.31          | -                                              |
| CsGeBrClI                                 | -1.64            | 0.66 | 0.127 | 2.48          | CsGe(Br,Cl) <sub>3</sub> ≤ 0.49 <sup>40</sup>  |
| CsSnBrClI                                 | -1.64            | 0.66 | 0.138 | 1.95          | -                                              |
|                                           |                  |      |       |               | Cs(Pb,Sn)Br <sub>3</sub> ≤ 0.14 <sup>74</sup>  |
|                                           |                  |      |       |               | Cs(Ge,Sn)Br <sub>3</sub> ≤ 0.16 <sup>112</sup> |
| CsGe0.33Pb0.33Sn0.33Br1.5Cl1.5            | -1.59            | 0.64 | 0.067 | 2.60          | CsGe(Br,Cl) <sub>3</sub> ≤ 0.49 <sup>40</sup>  |
|                                           |                  |      |       |               | Cs(Pb,Sn)Br <sub>3</sub> ≤ 0.14 <sup>74</sup>  |
|                                           |                  |      |       |               | Cs(Ge,Sn)Br <sub>3</sub> ≤ 0.16 <sup>112</sup> |
| CsGe0.33Pb0.33Sn0.33Br1.5I1.5             | -1.59            | 0.64 | 0.103 | 1.86          | Cs(Pb,Sn)I <sub>3</sub> ≤ 0.07 <sup>183</sup>  |
|                                           |                  |      |       |               | Cs(Ge,Sn)Br <sub>3</sub> ≤ 0.16 <sup>112</sup> |
| CsGe0.33Pb0.33Sn0.33Cl1.5I1.5             | -1.59            | 0.64 | 0.150 | 2.29          | Cs(Pb,Sn)I <sub>3</sub> ≤ 0.07 <sup>183</sup>  |
|                                           |                  |      |       |               | Cs(Pb,Sn)Br <sub>3</sub> ≤ 0.14 <sup>74</sup>  |
| CsPb0.5Sn0.5Br1.5Cl1.5                    | -1.38            | 0.55 | 0.054 | 2.44          | Cs(Pb,Sn)I <sub>3</sub> ≤ 0.07 <sup>183</sup>  |
| CsGe0.5Pb0.5Br1.5Cl1.5                    | -1.38            | 0.55 | 0.064 | 2.76          | CsGe(Br,Cl) <sub>3</sub> ≤ 0.49 <sup>40</sup>  |
|                                           |                  |      |       |               | Cs(Ge,Sn)Br <sub>3</sub> ≤ 0.16 <sup>112</sup> |
| CsGe0.5Sn0.5Br1.5Cl1.5                    | -1.38            | 0.55 | 0.071 | 2.59          | CsGe(Br,Cl) <sub>3</sub> ≤ 0.49 <sup>40</sup>  |
|                                           |                  |      |       |               | Cs(Pb,Sn)Br <sub>3</sub> ≤ 0.14 <sup>74</sup>  |
| CsPb0.5Sn0.5Br1.5I1.5                     | -1.38            | 0.55 | 0.094 | 1.79          | Cs(Pb,Sn)I <sub>3</sub> ≤ 0.07 <sup>183</sup>  |
| CsGe0.5Pb0.5Br1.5I1.5                     | -1.38            | 0.55 | 0.100 | 2.03          | -                                              |
| CsGe0.5Sn0.5Br1.5I1.5                     | -1.38            | 0.55 | 0.110 | 1.77          | Cs(Ge,Sn)Br <sub>3</sub> ≤ 0.16 <sup>112</sup> |
| CsGe0.5Pb0.5Cl1.5I1.5                     | -1.38            | 0.55 | 0.140 | 2.41          | -                                              |
| CsPb0.5Sn0.5Cl1.5I1.5                     | -1.38            | 0.55 | 0.144 | 2.17          | Cs(Pb,Sn)I <sub>3</sub> ≤ 0.07 <sup>183</sup>  |
| CsGe0.5Sn0.5Cl1.5I1.5                     | -1.38            | 0.55 | 0.162 | 2.29          | -                                              |
| CsCa0.17Eu0.17Ge0.17Pb0.17Sn0.17Sr0.17Cl3 | -0.89            | 0.36 | 0.049 | 4.66          | -                                              |
| CsEu0.2Ge0.2Pb0.2Sn0.2Sr0.2Cl3            | -0.80            | 0.32 | 0.038 | 3.97          | -                                              |
| CsCa0.2Eu0.2Ge0.2Sn0.2Sr0.2Cl3            | -0.80            | 0.32 | 0.043 | 5.02          | -                                              |
| CsCa0.2Eu0.2Pb0.2Sn0.2Sr0.2Cl3            | -0.80            | 0.32 | 0.047 | 4.91          | -                                              |
| CsCa0.2Eu0.2Ge0.2Pb0.2Sn0.2Cl3            | -0.80            | 0.32 | 0.051 | 4.05          | -                                              |
| CsCa0.2Ge0.2Pb0.2Sn0.2Sr0.2Cl3            | -0.80            | 0.32 | 0.053 | 4.98          | -                                              |
| CsCa0.2Eu0.2Ge0.2Pb0.2Sr0.2Cl3            | -0.80            | 0.32 | 0.053 | 5.03          | -                                              |
| CsEu0.25Pb0.25Sn0.25Sr0.25Cl3             | -0.69            | 0.28 | 0.021 | 4.11          | -                                              |
| CsEu0.25Ge0.25Sn0.25Sr0.25Cl3             | -0.69            | 0.28 | 0.032 | 4.26          | -                                              |
| CsCa0.25Eu0.25Ge0.25Sn0.25Cl3             | -0.69            | 0.28 | 0.041 | 4.35          | -                                              |
| Cs0.5Rb0.5Pb0.5Sn0.5I3                    | -0.69            | 0.28 | 0.041 | 1.67          | Cs(Pb,Sn)I <sub>3</sub> ≤ 0.07 <sup>183</sup>  |
| CsEu0.25Ge0.25Pb0.25Sn0.25Cl3             | -0.69            | 0.28 | 0.041 | 3.04          | -                                              |
| CsEu0.25Ge0.25Pb0.25Sr0.25Cl3             | -0.69            | 0.28 | 0.042 | 4.27          | -                                              |
| CsGe0.25Pb0.25Sn0.25Sr0.25Cl3             | -0.69            | 0.28 | 0.042 | 4.20          | -                                              |
| CsAu0.25Ge0.25Pb0.25Sn0.25I3              | -0.69            | 0.28 | 0.043 | 1.50          | -                                              |
| CsCa0.25Eu0.25Sn0.25Sr0.25Cl3             | -0.69            | 0.28 | 0.043 | 5.42          | -                                              |
| CsCa0.25Ge0.25Sn0.25Sr0.25Cl3             | -0.69            | 0.28 | 0.045 | 5.51          | -                                              |
|                                           |                  |      |       |               | Cs(Pb,Sn)Br <sub>3</sub> ≤ 0.14 <sup>74</sup>  |
| CsGe0.25Hg0.25Pb0.25Sn0.25Br3             | -0.69            | 0.28 | 0.046 | 2.37          | Cs(Ge,Sn)Br <sub>3</sub> ≤ 0.16 <sup>112</sup> |
| CsCa0.25Eu0.25Ge0.25Sr0.25Cl3             | -0.69            | 0.28 | 0.048 | 5.58          | -                                              |
| CsCa0.25Eu0.25Pb0.25Sn0.25Cl3             | -0.69            | 0.28 | 0.051 | 4.21          | -                                              |
| CsCa0.25Pb0.25Sn0.25Sr0.25Cl3             | -0.69            | 0.28 | 0.052 | 5.36          | -                                              |

|                               |       |      |       |      |                                                |
|-------------------------------|-------|------|-------|------|------------------------------------------------|
| CsCa0.25Eu0.25Pb0.25Sr0.25Cl3 | -0.69 | 0.28 | 0.052 | 5.44 | -                                              |
| CsCa0.25Ge0.25Pb0.25Sn0.25Cl3 | -0.69 | 0.28 | 0.055 | 4.30 | -                                              |
| CsCa0.25Eu0.25Ge0.25Pb0.25Cl3 | -0.69 | 0.28 | 0.057 | 4.37 | -                                              |
| CsCa0.25Ge0.25Pb0.25Sr0.25Cl3 | -0.69 | 0.28 | 0.059 | 5.52 | -                                              |
| CsEu0.33Sn0.33Sr0.33Cl3       | -0.55 | 0.22 | 0.012 | 4.53 | -                                              |
| CsEu0.33Pb0.33Sr0.33Cl3       | -0.55 | 0.22 | 0.018 | 4.55 | -                                              |
| CsPb0.33Sn0.33Sr0.33Cl3       | -0.55 | 0.22 | 0.024 | 4.45 | -                                              |
| CsEu0.33Pb0.33Sn0.33Cl3       | -0.55 | 0.22 | 0.025 | 2.91 | -                                              |
| CsEu0.33Ge0.33Sn0.33Cl3       | -0.55 | 0.22 | 0.031 | 3.11 | -                                              |
| CsAu0.33Ge0.33Pb0.33Cl3       | -0.55 | 0.22 | 0.031 | 1.56 | -                                              |
| CsCa0.33Ge0.33Sn0.33Cl3       | -0.55 | 0.22 | 0.035 | 4.78 | -                                              |
| CsGe0.33Sn0.33Sr0.33Cl3       | -0.55 | 0.22 | 0.036 | 4.64 | -                                              |
| CsEu0.33Ge0.33Sr0.33Cl3       | -0.55 | 0.22 | 0.037 | 4.74 | -                                              |
| CsGe0.33Pb0.33Sn0.33Cl3       | -0.55 | 0.22 | 0.038 | 1.56 | -                                              |
| Cs0.33Rb0.33Tl0.33PbI3        | -0.55 | 0.22 | 0.040 | 1.99 | -                                              |
| CsGe0.33Hg0.33Pb0.33Br3       | -0.55 | 0.22 | 0.040 | 2.58 | -                                              |
| CsGe0.33Pb0.33Sn0.33Br3       | -0.55 | 0.22 | 0.041 | 2.16 | Cs(Pb,Sn)Br <sub>3</sub> ≤ 0.14 <sup>74</sup>  |
| CsCa0.33Eu0.33Ge0.33Cl3       | -0.55 | 0.22 | 0.042 | 4.87 | Cs(Ge,Sn)Br <sub>3</sub> ≤ 0.16 <sup>112</sup> |
| CsAu0.33Pb0.33Sn0.33I3        | -0.55 | 0.22 | 0.043 | 1.45 | -                                              |
| CsCa0.33Eu0.33Sn0.33Cl3       | -0.55 | 0.22 | 0.043 | 4.66 | Cs(Pb,Sn)I <sub>3</sub> ≤ 0.07 <sup>183</sup>  |
| CsHg0.33Pb0.33Sn0.33Br3       | -0.55 | 0.22 | 0.043 | 2.37 | -                                              |
| CsGe0.33Hg0.33Sn0.33Br3       | -0.55 | 0.22 | 0.046 | 2.38 | Cs(Pb,Sn)Br <sub>3</sub> ≤ 0.14 <sup>74</sup>  |
| CsGe0.33Pb0.33Sn0.33Cl3       | -0.55 | 0.22 | 0.047 | 3.03 | Cs(Ge,Sn)Br <sub>3</sub> ≤ 0.16 <sup>112</sup> |
| CsEu0.33Ge0.33Pb0.33Cl3       | -0.55 | 0.22 | 0.047 | 3.12 | -                                              |
| CsAu0.33Ge0.33Sn0.33I3        | -0.55 | 0.22 | 0.047 | 1.42 | -                                              |
| CsCa0.33Sn0.33Sr0.33Cl3       | -0.55 | 0.22 | 0.048 | 6.20 | -                                              |
| CsGe0.33Pb0.33Sr0.33Cl3       | -0.55 | 0.22 | 0.048 | 4.66 | -                                              |
| CsCa0.33Ge0.33Sr0.33Cl3       | -0.55 | 0.22 | 0.049 | 6.41 | -                                              |
| CsCa0.33Eu0.33Sr0.33Cl3       | -0.55 | 0.22 | 0.050 | 6.30 | -                                              |
| CsCa0.33Pb0.33Sn0.33Cl3       | -0.55 | 0.22 | 0.058 | 4.58 | -                                              |
| CsCa0.33Eu0.33Pb0.33Cl3       | -0.55 | 0.22 | 0.059 | 4.68 | -                                              |
| CsCa0.33Pb0.33Sr0.33Cl3       | -0.55 | 0.22 | 0.060 | 6.22 | -                                              |
| CsCa0.33Ge0.33Pb0.33Cl3       | -0.55 | 0.22 | 0.063 | 4.79 | -                                              |

Table S10. A-site constituent, B-site constituent, X-site constituent, Pnma unit cell volume (or 20 atom equivalent for different symmetries; from the Materials Project<sup>11</sup> unless noted), structure (Hermann-Mauguin space group, crystal system, and space group number), experimental band gap, and reference(s) for all of the experimentally-observed inorganic ABX<sub>3</sub> HP.

| A-site | B-site | X-site | V (Å <sup>3</sup> ) | Structure              | Band gap (eV) | Ref.         |
|--------|--------|--------|---------------------|------------------------|---------------|--------------|
| Li     | Mg     | F      | 220.48              | Pm-3m, cubic, 221      | -             | 227-228      |
| Rb     | Be     | F      | 231.25              | Pm-3m, cubic, 221      | -             | 227, 229-231 |
| Na     | Mg     | F      | 234.87              | Pnma, orthorhombic, 62 | -             | 232-233      |
| Na     | Ni     | F      | 235.03              | Pnma, orthorhombic, 62 | -             | 232, 234     |
| Li     | Mn     | F      | 241.51              | Pccn, orthorhombic, 56 | -             | 227, 235     |
| Na     | Co     | F      | 245.30              | Pnma, orthorhombic, 62 | -             | 232, 236     |
| Na     | Cu     | F      | 245.83              | P-1, triclinic, 2      | -             | 232, 237     |
| Na     | Zn     | F      | 246.26              | Pnma, orthorhombic, 62 | -             | 232, 238     |
| Ag     | Mg     | F      | 253.76              | Pm-3m, cubic, 221      | -             | 232, 239     |
| Na     | Fe     | F      | 254.63              | Pnma, orthorhombic, 62 | -             | 232, 240     |
| Na     | Cr     | F      | 255.92              | P-1, triclinic, 2      | -             | 232, 241     |
| Ag     | Ni     | F      | 256.76              | Pm-3m, cubic, 221      | -             | 232, 239     |
| Ag     | Cu     | F      | 257.64              | Pm-3m, cubic, 221      | -             | 232, 242     |
| Na     | V      | F      | 257.70              | Pnma, orthorhombic, 62 | -             | 232, 243     |
| Ag     | Co     | F      | 264.72              | Pm-3m, cubic, 221      | -             | 232, 239     |
| Li     | Ba     | F      | 266.24              | Pm-3m, cubic, 221      | -             | 227, 244     |
| K      | Mg     | F      | 266.40              | Pm-3m, cubic, 221      | -             | 232, 244     |
| Na     | Mn     | F      | 266.54              | Pnma, orthorhombic, 62 | -             | 232, 245     |
| K      | Cu     | F      | 269.40              | Pm-3m, cubic, 221      | -             | 232, 246     |
| K      | Ni     | F      | 269.52              | Pm-3m, cubic, 221      | -             | 232, 247     |
| Ag     | Zn     | F      | 270.28              | Pm-3m, cubic, 221      | -             | 232, 248     |
| K      | Co     | F      | 276.76              | Pm-3m, cubic, 221      | -             | 232, 249     |
| Rb     | Mg     | F      | 281.40              | Pm-3m, cubic, 221      | -             | 227, 250     |
| K      | Zn     | F      | 282.12              | Pm-3m, cubic, 221      | -             | 232, 251     |
| Rb     | Cu     | F      | 284.08              | Pm-3m, cubic, 221      | -             | 232, 252     |
| Tl     | Ni     | F      | 284.44              | Pm-3m, cubic, 221      | -             | 253-254      |

|    |    |    |        |                         |   |               |
|----|----|----|--------|-------------------------|---|---------------|
| Tl | Mg | F  | 285.24 | Pm-3m, cubic, 221       | - | 227, 255-256  |
| Tl | Cu | F  | 288.96 | Pm-3m, cubic, 221       | - | 232, 252      |
| K  | Fe | F  | 289.08 | Pm-3m, cubic, 221       | - | 232, 246, 257 |
| Tl | Zn | F  | 296.36 | Pm-3m, cubic, 221       | - | 227, 258      |
| Tl | Co | F  | 296.44 | Pm-3m, cubic, 221       | - | 232, 252      |
| Rb | Fe | F  | 300.76 | Pm-3m, cubic, 221       | - | 232, 259      |
| K  | V  | F  | 301.76 | Pm-3m, cubic, 221       | - | 232, 260      |
| Rb | Co | F  | 307.33 | P63/mmc, hexagonal, 194 | - | 232, 261      |
| Rb | Zn | F  | 307.51 | P63/mmc, hexagonal, 194 | - | 232, 262      |
| Cs | Mg | F  | 307.56 | Pm-3m, cubic, 221       | - | 232, 263      |
| K  | Mn | F  | 308.00 | Pnma, orthorhombic, 62  | - | 232, 264      |
| Tl | Fe | F  | 308.04 | Pm-3m, cubic, 221       | - | 232, 240      |
| K  | Cr | F  | 308.40 | P4/mmm, tetragonal, 123 | - | 232, 265      |
| Rb | V  | F  | 312.48 | Pm-3m, cubic, 221       | - | 232, 243      |
| Rb | Cr | F  | 319.48 | P4/mmm, tetragonal, 123 | - | 232, 266      |
| K  | Pd | F  | 320.08 | Pm-3m, cubic, 221       | - | 227, 267      |
| Rb | Mn | F  | 320.76 | Pm-3m, cubic, 221       | - | 232, 268      |
| Tl | Mn | F  | 321.64 | Pm-3m, cubic, 221       | - | 232, 269      |
| Rb | Pd | F  | 328.28 | Pm-3m, cubic, 221       | - | 227, 270      |
| Tl | Pd | F  | 329.52 | Pm-3m, cubic, 221       | - | 253, 270      |
| K  | Ag | F  | 340.09 | Pnma, orthorhombic, 62  | - | 227, 271      |
| Cs | Fe | F  | 340.33 | P63/mmc, hexagonal, 194 | - | 121, 227      |
| K  | Cd | F  | 342.48 | Pnma, orthorhombic, 62  | - | 232, 272      |
| Ag | Mn | F  | 343.04 | Pm-3m, cubic, 221       | - | 232, 239      |
| Cs | Pd | F  | 344.08 | Pm-3m, cubic, 221       | - | 227, 270      |
| Cs | Co | F  | 345.67 | R-3m, trigonal, 166     | - | 227, 273      |
| K  | Ca | F  | 346.66 | Pnma, orthorhombic, 62  | - | 232, 274      |
| Rb | Ag | F  | 349.55 | I4/mcm, tetragonal, 140 | - | 227, 271      |
| Rb | Yb | F  | 352.16 | Pm-3m, cubic, 221       | - | 227, 275      |
| K  | Ge | F  | 352.72 | Pm-3m, cubic, 221       | - | 227, 276-277  |
| Cs | Mn | F  | 355.93 | P63/mmc, hexagonal, 194 | - | 227, 254      |
| Tl | Cd | F  | 357.50 | Pbam, orthorhombic, 55  | - | 232, 278      |
| Rb | Cd | F  | 365.20 | Pm-3m, cubic, 221       | - | 232, 278      |
| Cs | Yb | F  | 366.64 | Pm-3m, cubic, 221       | - | 227, 275      |
| Cs | Ni | F  | 367.84 | P63/mmc, hexagonal, 194 | - | 227, 279      |
| Rb | Ca | F  | 368.68 | Pm-3m, cubic, 221       | - | 232, 280      |
| Cs | Ag | F  | 376.36 | I4/mcm, tetragonal, 140 | - | 227, 281      |
| Tl | Hg | F  | 379.45 | Pbam, orthorhombic, 55  | - | 227, 282-283  |
| Cs | Cd | F  | 380.00 | Pm-3m, cubic, 221       | - | 232, 284      |
| Cs | Ca | F  | 384.76 | Pm-3m, cubic, 221       | - | 232, 244      |
| Cs | Be | F  | 388.93 | Pnma, orthorhombic, 62  | - | 232, 285      |
| K  | Hg | F  | 389.64 | Pm-3m, cubic, 221       | - | 232, 286      |
| Rb | Hg | F  | 395.80 | Pm-3m, cubic, 221       | - | 232, 286      |
| Li | Mg | Cl | 397.14 | P1, triclinic, 1        | - | 227, 287-289  |
| K  | Sn | F  | 402.49 | P-1, triclinic, 2       | - | 227, 290      |
| Tl | Sn | F  | 408.26 | Cc, monoclinic, 9       | - | 253, 290      |
| Cs | Hg | F  | 408.76 | Pm-3m, cubic, 221       | - | 232, 286      |
| K  | Ba | F  | 433.85 | P1, triclinic, 1        | - | 227, 287, 291 |
| Rb | Ni | F  | 442.23 | P63/mmc, hexagonal, 194 | - | 227, 292      |
| Rb | Sn | F  | 444.06 | P21/c, monoclinic, 14   | - | 253, 290      |
| Cs | Sr | F  | 451.60 | Pm-3m, cubic, 221       | - | 232, 244      |
| Cs | Eu | F  | 453.36 | Pm-3m, cubic, 221       | - | 227, 293      |
| Rb | Pb | F  | 459.64 | Pm-3m, cubic, 221       | - | 232, 294      |
| Cs | Tl | F  | 464.78 | Fm-3m, cubic, 225       | - | 227, 295      |
| Li | Mg | Br | 469.30 | P1, triclinic, 1        | - | 227, 287, 296 |
| Li | Ga | Cl | 471.30 | Pnma, orthorhombic, 62  | - | 227, 297      |
| Cs | Pb | F  | 471.32 | Pm-3m, cubic, 221       | - | 232, 298      |
| Rb | Sr | F  | 477.84 | Pm-3m, cubic, 221       | - | 227, 299-301  |
| Na | Mn | Cl | 480.69 | R-3, trigonal, 148      | - | 227, 302      |
| Cs | Sn | F  | 483.02 | P21/c, monoclinic, 14   | - | 253, 303      |
| K  | Ni | Cl | 488.61 | P63cm, hexagonal, 185   | - | 227, 304      |
| Cs | Zn | Cl | 488.69 | Pm-3m, cubic, 221       | - | 227, 305-306  |
| K  | Cr | Cl | 489.51 | R3c, trigonal, 161      | - | 253, 307      |
| K  | Fe | Cl | 492.97 | Pnma, orthorhombic, 62  | - | 232, 308      |
| Rb | Fe | Cl | 495.54 | P63/mmc, hexagonal, 194 | - | 227, 309-310  |
| Tl | Co | Cl | 496.56 | P63/mmc, hexagonal, 194 | - | 227, 311      |
| K  | Mg | Cl | 498.96 | Pnma, orthorhombic, 62  | - | 227, 312      |
| K  | Mn | Cl | 509.05 | Pnma, orthorhombic, 62  | - | 232, 313      |
| Tl | Mg | Cl | 511.70 | Pnma, orthorhombic, 62  | - | 227, 314      |
| Rb | Ni | Cl | 512.56 | P63/mmc, hexagonal, 194 | - | 227, 315      |

|    |    |    |        |                         |      |               |
|----|----|----|--------|-------------------------|------|---------------|
| K  | Ti | Cl | 518.93 | P63, hexagonal, 173     | -    | 227, 316      |
| Rb | Co | Cl | 523.30 | P63/mmc, hexagonal, 194 | -    | 227, 317      |
| In | Fe | Br | 523.77 | Pnma, orthorhombic, 62  | -    | 227, 318      |
| K  | Cu | Cl | 523.89 | P121/c1, monoclinic, 14 | -    | 227, 319-320  |
| Tl | Mn | Cl | 525.89 | Pnma, orthorhombic, 62  | -    | 232, 321      |
| K  | V  | Cl | 527.86 | P63/mmc, hexagonal, 194 | -    | 227, 322      |
| Rb | Ti | Cl | 533.96 | P63cm, hexagonal, 185   | -    | 227, 323      |
| Tl | Cu | Cl | 535.32 | P21/c, monoclinic, 14   | -    | 253, 324      |
| Tl | V  | Cl | 537.10 | P63/mmc, hexagonal, 194 | -    | 227, 325      |
| Rb | Mg | Cl | 539.81 | P63/mmc, hexagonal, 194 | -    | 227, 326      |
| Rb | Mn | Cl | 543.00 | P63/mmc, hexagonal, 194 | -    | 232, 327      |
| K  | Cd | Cl | 546.83 | Pnma, orthorhombic, 62  | -    | 232, 328      |
| Rb | Cu | Cl | 548.07 | Pbcn, orthorhombic, 60  | -    | 227, 329      |
| K  | Tc | Cl | 549.35 | C1c1, monoclinic, 9     | -    | 227, 330      |
| Rb | V  | Cl | 552.42 | P63/mmc, hexagonal, 194 | -    | 227, 331      |
| Cs | Ni | Cl | 552.86 | P63/mmc, hexagonal, 194 | -    | 332-333       |
| Cs | Co | Cl | 555.38 | P63/mmc, hexagonal, 194 | -    | 227, 334      |
| Rb | Cu | Br | 558.08 | Pm-3m, cubic, 221       | -    | 253, 335      |
| Ag | Pb | Br | 560.55 | Cmcm, orthorhombic, 63  | -    | 227, 336-337  |
| Tl | Fe | Br | 562.13 | P63cm, hexagonal, 185   | -    | 227, 338      |
| Tl | Cd | Cl | 563.38 | Pnma, orthorhombic, 62  | -    | 232, 339      |
| Cs | Fe | Cl | 569.82 | P63/mmc, hexagonal, 194 | -    | 227, 340      |
| Rb | Cr | Cl | 573.17 | C2/c, monoclinic, 15    | -    | 232, 307      |
| Na | Hg | Cl | 573.54 | Pnma, orthorhombic, 62  | -    | 227, 341      |
| Cs | Ti | Cl | 575.92 | P63/mmc, hexagonal, 194 | -    | 227, 342      |
| Tl | Pb | Cl | 576.63 | Fmm2, orthorhombic, 42  | -    | 50, 227       |
| Tl | Mn | Br | 578.70 | Pnma, orthorhombic, 62  | -    | 227, 343      |
| Li | Ga | Br | 578.93 | P121/m1, monoclinic, 11 | -    | 227, 344      |
| Rb | Cd | Cl | 581.10 | Pnma, orthorhombic, 62  | -    | 232, 345      |
| Cs | Cu | Cl | 581.37 | P612-2, hexagonal, 178  | -    | 227, 346      |
| K  | Fe | Br | 584.01 | Pnma, orthorhombic, 62  | -    | 227, 347      |
| Cs | Cr | Cl | 584.74 | P63/mmc, hexagonal, 194 | -    | 227, 348      |
| Cs | Mn | Cl | 585.48 | R-3m, rhombohedral, 166 | -    | 232, 349      |
| K  | Ca | Cl | 587.95 | Pnma, orthorhombic, 62  | -    | 232, 328      |
| Cs | V  | Cl | 590.08 | P63/mmc, hexagonal, 194 | -    | 227, 350      |
| Tl | Ca | Cl | 592.61 | Cmcm, orthorhombic, 63  | -    | 253, 351      |
| K  | Cd | Br | 595.05 | Pnma, orthorhombic, 62  | -    | 227, 352      |
| Cs | Mg | Cl | 596.78 | P63/mmc, hexagonal, 194 | -    | 227, 334      |
| In | Mn | Br | 596.85 | Pnma, orthorhombic, 62  | -    | 227, 353      |
| K  | Mn | Br | 599.18 | Pnma, orthorhombic, 62  | -    | 227, 354      |
| Cs | Tm | Cl | 599.64 | Pm-3m, cubic, 221       | -    | 227, 355      |
| Rb | Ni | Br | 602.52 | P63/mmc, hexagonal, 194 | -    | 227, 315      |
| Cs | Ag | Cl | 603.61 | I4/mmm, tetragonal, 139 | -    | 227, 356      |
| Tl | Hg | Cl | 604.96 | Pnma, orthorhombic, 62  | -    | 227, 357      |
| In | Mg | Br | 605.54 | Pnma, orthorhombic, 62  | -    | 227, 358      |
| Cs | Sc | Cl | 607.48 | P63/mmc, hexagonal, 194 | -    | 227, 359      |
| Cs | Pd | Br | 607.52 | Pm-3m, cubic, 221       | -    | 253, 360-361  |
| K  | Ge | Cl | 612.00 | Cm, monoclinic, 8       | -    | 362-363       |
| K  | Ti | Br | 614.63 | P63, hexagonal, 173     | -    | 227, 316      |
| In | Cr | Br | 617.05 | P21/c, monoclinic, 14   | -    | 227, 318      |
| Cs | Fe | Br | 618.20 | P63/mmc, hexagonal, 194 | -    | 227, 364      |
| Rb | Tm | Cl | 619.03 | Pnma, orthorhombic, 62  | -    | 227, 365      |
| Na | Ca | Br | 624.56 | R-3, trigonal, 148      | -    | 227, 366      |
| Cs | Cd | Cl | 625.27 | P63/mmc, hexagonal, 194 | -    | 232, 367      |
| Rb | Ti | Br | 629.60 | P63cm, hexagonal, 185   | -    | 227, 316      |
| Cs | Hg | Cl | 630.84 | Pm-3m, cubic, 221       | -    | 232, 368      |
| In | Cd | Br | 632.19 | Pnma, orthorhombic, 62  | -    | 227, 369      |
| Li | Ca | Cl | 634.24 | Pm-3m, cubic, 221       | -    | 227, 287, 370 |
| Tl | Hg | Br | 635.20 | Pnma, orthorhombic, 62  | 2.44 | 227, 371-372  |
| Tl | Fe | I  | 635.31 | Pnma, orthorhombic, 62  | -    | 227, 373      |
| Rb | Ca | Cl | 638.78 | Cm, monoclinic, 8       | -    | 232, 374      |
| Cs | Yb | Cl | 638.92 | Pm-3m, cubic, 221       | -    | 227, 355      |
| Tl | Cd | Br | 641.98 | Pnma, orthorhombic, 62  | -    | 227, 339      |
| Rb | V  | Br | 646.99 | P63cm, hexagonal, 185   | -    | 227, 375      |
| Cs | Ni | Br | 650.02 | P63/mmc, hexagonal, 194 | -    | 332, 376      |
| Li | Sc | I  | 650.72 | P-6c2, hexagonal, 188   | -    | 227, 377      |
| Cs | Ca | Cl | 654.16 | Pm-3m, cubic, 221       | 8.10 | 232, 378-379  |
| Cs | Au | Cl | 654.19 | I4/mmm, tetragonal, 139 | -    | 227, 380      |
| Rb | Mn | Br | 663.28 | P63/mmc, hexagonal, 194 | -    | 227, 381      |
| Cs | Cu | Br | 665.27 | C2221, orthorhombic, 20 | -    | 227, 382      |

|    |    |    |        |                             |      |               |
|----|----|----|--------|-----------------------------|------|---------------|
| Cs | Sm | Cl | 665.44 | Pm-3m, cubic, 221           | -    | 227, 355      |
| Cs | Ge | Cl | 672.15 | R3m, rhombohedral, 160      | 3.43 | 383           |
| K  | Ca | Br | 674.88 | Cmcm, orthorhombic, 63      | -    | 227, 366      |
| Rb | Cd | Br | 675.15 | Pnma, orthorhombic, 62      | -    | 232, 345      |
| Cs | Cr | Br | 677.16 | P63/mc, hexagonal, 186      | -    | 227, 384      |
| Rb | Ge | Cl | 678.48 | P121/m1, monoclinic, 11     | -    | 227, 385      |
| In | Ca | Br | 678.51 | Cmcm, orthorhombic, 63      | -    | 227, 386      |
| Cs | Ti | Br | 678.80 | P63/mmc, hexagonal, 194     | -    | 227, 387      |
| Cs | V  | Br | 680.72 | P63/mmc, hexagonal, 194     | -    | 227, 375      |
| K  | Dy | Br | 682.28 | Pnma, orthorhombic, 62      | -    | 227, 388      |
| K  | Sr | Cl | 682.71 | Pm-3m, cubic, 221           | -    | 227, 287, 389 |
| Tl | Ca | Br | 685.09 | Cmcm, orthorhombic, 63      | -    | 227, 386      |
| Cs | Pd | Cl | 689.47 | Ibam, orthorhombic, 72      | -    | 227, 390      |
| Cs | In | Cl | 696.73 | Fm-3m, cubic, 225           | -    | 332, 391      |
| Rb | Sr | Cl | 697.65 | P21/m, monoclinic, 11       | -    | 227, 392      |
| Cs | Sc | Br | 700.82 | P63/mmc, hexagonal, 194     | -    | 253, 359      |
| K  | Sn | Cl | 700.96 | Pm-3m, cubic, 221           | -    | 362, 393-394  |
| Cs | Mg | Br | 701.44 | P63/mmc, hexagonal, 194     | -    | 227, 395      |
| Rb | Sn | Cl | 702.05 | R3c, trigonal, 161          | -    | 253, 396      |
| Cs | Tm | Br | 704.68 | P4/mbm, tetragonal, 127     | -    | 227, 397      |
| Cs | Mn | Br | 705.64 | P63/mmc, hexagonal, 194     | -    | 332, 398      |
| K  | Sn | Br | 710.10 | Pnma, orthorhombic, 62      | -    | 362, 393, 399 |
| Cs | Cd | Br | 711.24 | Pm-3m, cubic, 221           | -    | 232, 400      |
| Cs | Sn | Cl | 711.88 | Pm-3m, cubic, 221           | 2.80 | 37-38, 232    |
| Rb | Yb | Br | 713.90 | Pnma, orthorhombic, 62      | -    | 227, 397      |
| Cs | Eu | Cl | 722.69 | Pnma, orthorhombic, 62      | 3.09 | 232, 355, 401 |
| Rb | Ca | Br | 723.13 | Pnma, orthorhombic, 62      | -    | 227, 366      |
| Rb | Eu | Cl | 723.68 | Pm-3m, cubic, 221           | -    | 227, 392      |
| Li | Ga | I  | 726.11 | P121/m1, monoclinic, 11     | -    | 227, 297      |
| Tl | Mn | I  | 727.35 | Pnma, orthorhombic, 62      | -    | 232, 402      |
| Rb | Au | Br | 729.83 | C12/m1, monoclinic, 12      | -    | 227, 403      |
| Cs | Tl | Cl | 730.22 | Fm-3m, cubic, 225           | -    | 227, 295      |
| Cs | Sr | Cl | 732.88 | Pnma, orthorhombic, 62      | 7.70 | 232, 379, 404 |
| Li | Ca | Br | 734.94 | Pm-3m, cubic, 221           | -    | 227, 287, 405 |
| Cs | Dy | Br | 736.62 | P4/mbm, tetragonal, 127     | -    | 227, 388      |
| Cs | Au | Br | 737.38 | I4/mmm, tetragonal, 139     | -    | 227, 406      |
| In | Sn | Cl | 738.56 | R-3, trigonal, 148          | -    | 253, 407      |
| Cs | Hg | Br | 738.84 | Pm-3m, cubic, 221           | 3.00 | 232, 408      |
| K  | In | Br | 739.45 | P-3, trigonal, 147          | -    | 227, 409      |
| Rb | Sn | Br | 740.72 | Pnma, orthorhombic, 62      | -    | 253, 410      |
| Cs | Ge | Br | 741.96 | R3m, rhombohedral, 160      | 2.38 | 383, 411      |
| Rb | Ge | Br | 742.79 | Pna21, orthorhombic, 33     | 2.74 | 41, 362, 412  |
| Cs | Ni | I  | 744.78 | P63/mmc, hexagonal, 194     | -    | 227, 413      |
| Rb | Pb | Cl | 749.80 | Pm-3m, cubic, 221           | -    | 227, 414      |
| Cs | Pb | Cl | 754.08 | Pm-3m, cubic, 221           | 2.85 | 232, 415-416  |
| Cs | Yb | Br | 755.40 | Pm-3m, cubic, 221           | -    | 227, 397      |
| Tl | Ge | I  | 768.29 | Pnma, orthorhombic, 62      | -    | 227, 417      |
| Cs | Ca | Br | 769.44 | Pm-3m, cubic, 221           | -    | 227, 366      |
| Rb | Pb | Br | 771.86 | Cmcm, orthorhombic, 63      | -    | 227, 418      |
| K  | Tm | I  | 773.85 | Cmcm, orthorhombic, 63      | -    | 227, 397      |
| Cs | Eu | I  | 777.26 | Orthorhombic                | -    | 227, 419      |
| Tl | Cd | I  | 777.88 | Pnma, orthorhombic, 62      | -    | 227, 402      |
| K  | Pb | Br | 784.49 | Pm-3m, cubic, 221           | -    | 362, 420-421  |
| In | Sn | Br | 785.07 | R3c, trigonal, 161          | -    | 253, 407      |
| Rb | Cr | I  | 793.27 | C12/m1, monoclinic, 12      | -    | 227, 422      |
| K  | Ti | I  | 794.75 | P63, hexagonal, 173         | -    | 227, 316      |
| Rb | Tm | I  | 795.51 | Pnma, orthorhombic, 62      | -    | 397, 423      |
| Cs | In | Br | 795.52 | Fm-3m, cubic, 225           | -    | 332, 391      |
| K  | Dy | I  | 798.22 | Cmcm, orthorhombic, 63      | -    | 227, 386      |
| Rb | V  | I  | 798.93 | P63cm, hexagonal, 185       | -    | 227, 422      |
| Cs | Pb | Br | 805.45 | Pnma, orthorhombic, 62      | 2.36 | 232, 424-425  |
| Rb | Sr | Br | 805.75 | Pnma, orthorhombic, 62      | -    | 227, 426      |
| Rb | Ti | I  | 808.79 | P63cm, hexagonal, 185       | -    | 227, 422      |
| Cs | Sn | Br | 815.68 | Pm-3m, cubic, 221           | 1.75 | 37-38, 232    |
| Rb | Ge | I  | 823.34 | P21-21-21, orthorhombic, 19 | -    | 227, 427      |
| Cs | V  | I  | 828.90 | P63/mmc, hexagonal, 194     | -    | 332, 413      |
| Cs | Eu | Br | 832.70 | Pnma, orthorhombic, 62      | -    | 227, 428      |
| K  | Yb | I  | 834.62 | Cmcm, orthorhombic, 63      | -    | 227, 397      |
| Cs | Ba | Cl | 838.34 | Pm-3m, cubic, 221           | -    | 227, 287, 429 |
| K  | Ca | I  | 842.54 | Cmcm, orthorhombic, 63      | -    | 227, 386      |

|    |    |    |         |                         |      |               |
|----|----|----|---------|-------------------------|------|---------------|
| Cs | Ti | I  | 843.44  | P63/mmc, hexagonal, 194 | -    | 227, 430      |
| K  | Au | I  | 843.44  | P121/c1, monoclinic, 14 | -    | 227, 403      |
| Cs | Sr | Br | 844.87  | Pnma, orthorhombic, 62  | -    | 227, 386      |
| Cs | Mn | I  | 848.66  | P63/mmc, hexagonal, 194 | -    | 332, 431      |
| Rb | Dy | I  | 860.52  | Pnma, orthorhombic, 62  | -    | 388, 423      |
| K  | Sn | I  | 862.75  | Pnma, orthorhombic, 62  | -    | 362, 432-433  |
| Cs | Mg | I  | 865.54  | P63/mmc, hexagonal, 194 | -    | 332, 413      |
| Rb | Yb | I  | 869.74  | Pnma, orthorhombic, 62  | -    | 227, 434      |
| Tl | Pb | I  | 871.24  | Cmcm, orthorhombic, 63  | 2.25 | 232, 435-436  |
| Rb | Au | I  | 875.14  | C12/m1, monoclinic, 12  | -    | 227, 403      |
| Rb | Ca | I  | 878.95  | Pnma, orthorhombic, 62  | -    | 227, 386      |
| Cs | Tm | I  | 880.11  | Pnma, orthorhombic, 62  | -    | 397, 423      |
| K  | Pb | I  | 882.24  | Pnma, orthorhombic, 62  | -    | 227, 402      |
| Cs | Dy | I  | 891.96  | Pnma, orthorhombic, 62  | -    | 423, 437      |
| Rb | Sn | I  | 893.32  | Pnma, orthorhombic, 62  | 1.62 | 232, 438-439  |
| Cs | Au | I  | 895.13  | I4/mmm, tetragonal, 139 | 1.31 | 440-441       |
| Cs | Ge | I  | 906.57  | R3m, rhombohedral, 160  | 1.63 | 442           |
| Rb | Pb | I  | 919.08  | Pnma, orthorhombic, 62  | 2.00 | 227, 443-444  |
| Cs | Ca | I  | 932.40  | Pnma, orthorhombic, 62  | -    | 386, 423      |
| Cs | Yb | I  | 933.60  | Pnma, orthorhombic, 62  | -    | 423, 445      |
| Rb | Hg | I  | 959.40  | Ama2, orthorhombic, 40  | -    | 362, 446      |
| Cs | Pb | I  | 960.71  | Pnma, orthorhombic, 62  | 1.73 | 423, 447-448  |
| Cs | Sn | I  | 993.64  | Pm-3m, cubic, 221       | 1.31 | 37-38, 232    |
| Cs | Sr | I  | 999.33  | Cmcm, orthorhombic, 63  | -    | 227, 386      |
| Cs | Ba | Br | 1019.36 | Pm-3m, cubic, 221       | -    | 227, 449-450  |
| Cs | Cd | I  | -       | -                       | -    | 332, 451      |
| Cs | Ga | Cl | -       | -                       | -    | 332           |
| Cu | Cd | Cl | -       | Tetragonal              | -    | 227, 452      |
| K  | Cd | I  | -       | -                       | -    | 227, 453      |
| K  | Co | Br | -       | -                       | -    | 227, 283, 454 |
| K  | Pb | F  | -       | -                       | -    | 227, 455      |
| K  | Sr | F  | -       | -                       | -    | 227, 301      |
| Li | Co | Br | -       | Pm-3m, cubic, 221       | -    | 227, 456-457  |
| Li | V  | Cl | -       | Fd-3m, cubic, 227       | -    | 227, 458      |
| Li | Zn | F  | -       | -                       | -    | 227, 459      |
| Na | Ca | Cl | -       | -                       | -    | 227, 460      |
| Na | Cd | Cl | -       | -                       | -    | 227, 461      |
| Na | Cr | Cl | -       | -                       | -    | 227, 462      |
| Na | Ni | Cl | -       | -                       | -    | 227, 463      |
| Na | Sr | F  | -       | -                       | -    | 227, 301      |
| Na | Ti | Cl | -       | -                       | -    | 227, 464      |
| Rb | Be | Cl | -       | Tetragonal              | -    | 227, 465      |
| Rb | Cd | I  | -       | -                       | -    | 345, 362      |
| Tl | Cr | F  | -       | -                       | -    | 232, 466-467  |
| Tl | Fe | Cl | -       | -                       | -    | 227, 340      |
| Tl | Sr | Cl | -       | -                       | -    | 227, 468      |

Table S11. A-site constituent, B-site constituent, X-site constituent, Pnma unit cell volume (or 20 atom equivalent for different symmetries), structure (Hermann-Mauguin space group, crystal system, and space group number), experimental band gap, and reference(s) for all of the experimentally-observed organic ABX<sub>3</sub> HP (organic cation abbreviations are defined in the text).

| A-site | B-site | X-site | V (Å <sup>3</sup> ) | Structure               | Band gap (eV) | Ref.          |
|--------|--------|--------|---------------------|-------------------------|---------------|---------------|
| NH4    | Mg     | F      | 267.69              | Pm-3m, cubic, 221       | -             | 469-470       |
| NH4    | Ni     | F      | 270.18              | Fm-3m, cubic, 225       | -             | 466, 471      |
| NH4    | Zn     | F      | 279.08              | Pm-3m, cubic, 221       | -             | 466, 471-472  |
| NH4    | Co     | F      | 281.16              | Pm-3m, cubic, 221       | -             | 252, 466, 471 |
| NH4    | Cu     | F      | 286.32              | P4/mbm, tetragonal, 127 | -             | 466, 471, 473 |
| NH4    | Fe     | F      | 291.51              | Pm-3m, cubic, 221       | -             | 466, 471, 474 |
| NH4    | Cr     | F      | 309.84              | I4/mcm, tetragonal, 140 | -             | 466, 471, 475 |
| NH4    | Mn     | F      | 316.88              | Pnma, orthorhombic, 62  | -             | 466, 471, 476 |
| NH4    | Cd     | F      | 338.25              | Pnma, orthorhombic, 62  | -             | 466, 471, 477 |
| NH4    | Sn     | F      | 426.29              | R-3, trigonal, 148      | -             | 469, 478      |
| NH4    | Fe     | Cl     | 516.30              | P63/mmc, hexagonal, 194 | -             | 340           |
| NH4    | Mn     | Cl     | 517.28              | Pm-3m, cubic, 221       | -             | 479           |
| NH4    | Ni     | Br     | 568.40              | P63mc, hexagonal, 186   | -             | 363           |
| NH4    | Cd     | Cl     | 568.69              | Pnma, orthorhombic, 62  | -             | 480-481       |

|      |    |    |         |                         |      |         |
|------|----|----|---------|-------------------------|------|---------|
| NH4  | Cd | Br | 653.84  | Pnma, orthorhombic, 62  | -    | 480     |
| HA   | Cd | Br | 726.60  | P21/c, monoclinic, 14   | -    | 480     |
| MA   | Pb | Cl | 734.55  | Pm-3m, cubic, 221       | 3.02 | 482     |
| MA   | Sn | Cl | 764.41  | Pm-3m, cubic, 221       | 3.65 | 482     |
| FA   | Pb | Cl | 780.45  | Pm-3m, cubic, 221       | 2.94 | 482     |
| MA   | Ge | Br | 817.76  | Pm-3m, cubic, 221       | 2.55 | 482     |
| MA   | Sn | Br | 821.10  | Pm-3m, cubic, 221       | 2.18 | 482     |
| MA   | Pb | Br | 834.53  | Pm-3m, cubic, 221       | 2.28 | 482     |
| FA   | Pb | Br | 864.00  | Pm-3m, cubic, 221       | 2.26 | 482     |
| MA   | Ge | I  | 884.90  | Pm-3m, cubic, 221       | 1.95 | 482     |
| FA   | Sn | Br | 888.42  | Pm-3m, cubic, 221       | 2.47 | 482     |
| AZ   | Pb | Br | 941.73  | P63/mmc, hexagonal, 194 | 2.81 | 483     |
| FA   | Ge | I  | 970.93  | R3m, trigonal, 160      | 2.20 | 484     |
| MA   | Sn | I  | 971.42  | Pm-3m, cubic, 221       | 1.28 | 482     |
| FA   | Sn | I  | 1007.83 | Pm-3m, cubic, 221       | 1.40 | 482     |
| MA   | Pb | I  | 1014.06 | Pm-3m, cubic, 221       | 1.62 | 482     |
| NH4  | Sn | I  | 1017.33 | P1, triclinic, 1        | -    | 485-486 |
| FA   | Pb | I  | 1030.01 | Pm-3m, cubic, 221       | 1.50 | 482     |
| ACA  | Ge | I  | 1068.23 | P21, monoclinic, 2      | 2.50 | 484     |
| EA   | Sn | I  | 1071.13 | P63mc, hexagonal, 186   | 2.18 | 487     |
| GA   | Sn | I  | 1083.06 | P63/m, hexagonal, 176   | 1.90 | 487     |
| DMA  | Pb | I  | 1084.60 | Cmc21, orthorhombic, 36 | -    | 363     |
| IM   | Sn | I  | 1117.20 | Pc, monoclinic, 7       | 2.20 | 487     |
| ACA  | Sn | I  | 1127.22 | P63mc, hexagonal, 186   | 2.15 | 487     |
| TMA  | Pb | I  | 1190.20 | P-3, hexagonal, 147     | -    | 363     |
| TEMA | Pb | I  | 1317.40 | P63/m, hexagonal, 176   | -    | 363     |

Table S12. A-site constituent, B-site constituent, X-site constituent, Pnma unit cell volume (or 20 atom equivalent for different symmetries; from the Materials Project<sup>11</sup> unless noted), structure (Hermann-Mauguin space group, crystal system, and space group number), and reference(s) for all of the *non-experimentally-observed inorganic ABX<sub>3</sub> HP*.<sup>227, 253, 276, 391</sup>

| A-site | B-site | X-site | V (Å <sup>3</sup> ) | Structure              | Ref. |
|--------|--------|--------|---------------------|------------------------|------|
| Li     | Pb     | Cl     | 103.03              | Pm-3m, cubic, 221      | 227  |
| Li     | Ca     | F      | 212.84              | Pm-3m, cubic, 221      | 227  |
| Li     | Ni     | F      | 213.97              | R-3, trigonal, 148     | 227  |
| Cs     | Ba     | F      | 296.78              | Pm-3m, cubic, 221      | 227  |
| Na     | Cd     | F      | 302.39              | R3c, trigonal, 161     | 227  |
| In     | Mn     | F      | 320.48              | P1, triclinic, 1       | 253  |
| Cu     | Ge     | I      | 337.47              | Cm, monoclinic, 8      | 227  |
| Tl     | Ag     | F      | 347.32              | R3m, monoclinic, 8     | 253  |
| Na     | Ca     | F      | 349.81              | Pm-3m, cubic, 221      | 227  |
| Rb     | Ge     | F      | 362.08              | Pm-3m, cubic, 221      | 276  |
| Tl     | Ca     | F      | 368.45              | R3c, trigonal, 161     | 227  |
| Li     | Be     | Cl     | 371.22              | Pm-3m, cubic, 221      | 227  |
| Cs     | Na     | F      | 395.24              | Pnma, orthorhombic, 62 | 253  |
| K      | Be     | Cl     | 400.36              | Pm-3m, cubic, 221      | 227  |
| Tl     | Ge     | F      | 424.58              | P21/m, monoclinic, 11  | 253  |
| Cs     | In     | F      | 439.34              | Fm-3m, cubic, 225      | 253  |
| Na     | Pb     | F      | 448.48              | Pm-3m, cubic, 221      | 227  |
| Rb     | Tl     | F      | 449.18              | Fm-3m, cubic, 225      | 253  |
| Tl     | Zn     | Cl     | 494.02              | Pm-3m, cubic, 221      | 227  |
| Rb     | Pd     | Cl     | 501.96              | Pm-3m, cubic, 221      | 253  |
| Rb     | Zn     | Cl     | 502.40              | Pm-3m, cubic, 221      | 227  |
| Li     | Sn     | Cl     | 519.49              | R3c, trigonal, 161     | 253  |
| Na     | Ba     | F      | 531.23              | Pm-3m, cubic, 221      | 227  |
| K      | Ag     | Cl     | 535.39              | R3c, trigonal, 161     | 253  |
| Tl     | Ag     | Cl     | 539.24              | P4mm, tetragonal, 99   | 253  |
| Na     | Mg     | Br     | 540.98              | Pm-3m, cubic, 221      | 227  |
| Rb     | Ag     | Cl     | 551.88              | Pm, monoclinic, 6      | 253  |
| Ag     | Ca     | Cl     | 557.58              | Pm-3m, cubic, 221      | 227  |
| Cu     | Ca     | Cl     | 559.84              | Pm-3m, cubic, 221      | 227  |
| Rb     | Pd     | Br     | 593.00              | Amm2, monoclinic, 6    | 253  |
| Na     | Pb     | Cl     | 598.31              | R3, trigonal, 146      | 227  |
| K      | Ag     | Br     | 627.36              | R3c, trigonal, 161     | 253  |
| Tl     | Ag     | Br     | 632.23              | R3c, trigonal, 161     | 253  |
| In     | Pb     | Cl     | 643.42              | Cmcm, orthorhombic, 63 | 253  |

|    |    |    |        |                         |               |
|----|----|----|--------|-------------------------|---------------|
| Tl | Ge | Br | 644.18 | Pnma, orthorhombic, 62  | 253           |
| Rb | Ag | Br | 646.44 | P1, triclinic, 1        | 253           |
| Tl | Ge | Cl | 649.38 | P21/m, monoclinic, 11   | 253           |
| Cs | Ag | Br | 663.96 | Amm2, monoclinic, 6     | 253           |
| Rb | In | Cl | 682.26 | Fm-3m, cubic, 225       | 253           |
| In | Ge | Cl | 686.13 | R3c, trigonal, 161      | 253           |
| Rb | Tl | Cl | 714.61 | Fm-3m, cubic, 225       | 227           |
| K  | Mg | I  | 717.05 | P1, triclinic, 1        | 227           |
| K  | Ge | Br | 740.78 | P21/m, monoclinic, 11   | 253           |
| Rb | Mg | I  | 751.15 | P1, triclinic, 1        | 227           |
| Rb | In | Br | 782.65 | Fm-3m, cubic, 225       | 253           |
| Li | Sr | Br | 815.47 | Pm-3m, cubic, 221       | 227           |
| Rb | Tl | Br | 821.66 | Fm-3m, cubic, 225       | 253           |
| Li | Ba | Cl | 833.27 | Pm-3m, cubic, 221       | 227           |
| K  | Ba | Cl | 835.59 | Pm-3m, cubic, 221       | 227           |
| Cs | Tl | Br | 836.08 | Fm-3m, cubic, 225       | 253           |
| Li | Ba | Br | 951.24 | Pm-3m, cubic, 221       | 227           |
| K  | Ba | Br | 958.63 | Pm-3m, cubic, 221       | 227           |
| Rb | Ba | Br | 958.86 | Pm-3m, cubic, 221       | 227           |
| Cs | In | I  | 967.41 | Fm-3m, cubic, 225       | 253, 391      |
| H  | Pb | I  | 973.84 | Pnma, orthorhombic, 62  | 227           |
| Rb | Ba | I  | 990.78 | Pnma, orthorhombic, 62  | 227           |
| K  | Hg | I  | 990.79 | Pna21, orthorhombic, 33 | 227           |
| Li | Pb | Br | -      | Pm-3m, cubic, 221       | 227, 456, 488 |
| Ag | Cd | Br | -      | -                       | 227           |
| Ag | Mg | Cl | -      | -                       | 227           |
| Ag | Pb | F  | -      | -                       | 227           |
| Ag | Sn | Cl | -      | -                       | 227           |
| Au | Zn | F  | -      | -                       | 227           |
| Cu | Cd | I  | -      | -                       | 227           |
| Cu | Zn | Cl | -      | -                       | 227           |
| K  | Co | I  | -      | -                       | 227           |
| K  | Mn | I  | -      | -                       | 227           |
| K  | Sm | Cl | -      | -                       | 227           |
| Li | Cr | Cl | -      | -                       | 227           |
| Li | Mg | I  | -      | -                       | 227           |
| Li | Mn | I  | -      | -                       | 227           |
| Li | Ni | Cl | -      | -                       | 227           |
| Li | Pb | F  | -      | -                       | 227           |
| Na | Ba | Br | -      | -                       | 227           |
| Na | Ba | Cl | -      | -                       | 227           |
| Na | Be | Cl | -      | -                       | 227           |
| Na | Ca | I  | -      | -                       | 227           |
| Na | Cd | Br | -      | -                       | 227           |
| Na | Cd | I  | -      | -                       | 227           |
| Na | Hg | I  | -      | -                       | 227           |
| Na | Mg | I  | -      | -                       | 227           |
| Na | Sn | Cl | -      | -                       | 227           |
| Na | Sr | Br | -      | -                       | 227           |
| Na | Sr | Cl | -      | -                       | 227           |
| Na | Zn | Cl | -      | -                       | 227           |
| Rb | Ba | F  | -      | -                       | 227           |
| Rb | Mn | I  | -      | -                       | 227           |
| Tl | Be | Cl | -      | -                       | 227           |
| Tl | Eu | Cl | -      | -                       | 227           |
| Tl | In | Cl | -      | P1, triclinic, 1        | 253           |

## References

(1) Han, G.; Yeu, I. W.; Park, J.; Ye, K. H.; Lee, S.-C.; Hwang, C. S.; Choi, J.-H. Effect of local strain energy to predict accurate phase diagram of III–V pseudobinary systems: case of Ga(As,Sb) and (In,Ga)As. *Journal of Physics D: Applied Physics* **2021**, *54* (4), 045104, DOI: 10.1088/1361-6463/abbf78.



- (2) Stringfellow, G. B. Miscibility gaps in quaternary III/V alloys. *Journal of Crystal Growth* **1982**, 58 (1), 194-202, DOI: 10.1016/0022-0248(82)90226-3.
- (3) Panish, M. B.; Ilegems, M. Phase equilibria in ternary III–V systems. *Progress in Solid State Chemistry* **1972**, 7, 39-83, DOI: 10.1016/0079-6786(72)90004-0.
- (4) Foster, L. M. A Lattice Parameter Criterion for Miscibility Gaps in the III – V and II – VI Pseudobinary Solid Solutions. *Journal of The Electrochemical Society* **1974**, 121 (12), 1662, DOI: 10.1149/1.2401764.
- (5) Asadov, M. M. The HgS + Tl<sub>2</sub>Se  $\leftrightarrow$  HgSe + Tl<sub>2</sub>S reciprocal system. (*Russian*) *Journal of Inorganic Chemistry (translated from Zhurnal Neorganicheskoi Khimii)* **1983**, 28, 1025-1028.
- (6) Leute, V.; Köller, H.-J. The Four Quasibinary Phase Diagrams of the Quasiternary System (Hg,Pb) (Se,Te). *Zeitschrift für Physikalische Chemie* **1986**, 149 (2), 213-227, DOI: 10.1524/zpch.1986.149.2.213.
- (7) Ohata, K.; Saraie, J.; Tanaka, T. Phase Diagram of the CdS-CdTe Pseudobinary System. *Japanese Journal of Applied Physics* **1973**, 12 (8), 1198, DOI: 10.1143/JJAP.12.1198.
- (8) Ohtani, H.; Kojima, K.; Ishida, K.; Nishizawa, T. Miscibility gap in II–VI alloy semiconductor systems. *Journal of Alloys and Compounds* **1992**, 182 (1), 103-114, DOI: 10.1016/0925-8388(92)90579-X.
- (9) Tomashik, V.; Oleinik, G.; Mizetskaya, I. The System CdTe--ZnS. *Izv. Akad. Nauk SSSR, Neorg. Mater.* **1978**, 14 (10), 1838-1840.
- (10) Tomashyk, V.; Feychuk, P.; Shcherbak, L. *Ternary alloys based on II-VI semiconductor compounds*, CRC Press: 2014; p 526.
- (11) Jain, A.; Ong, S. P.; Hautier, G.; Chen, W.; Richards, W. D.; Dacek, S.; Cholia, S.; Gunter, D.; Skinner, D.; Ceder, G.; Persson, K. A. Commentary: The Materials Project: A materials genome approach to accelerating materials innovation. *APL Materials* **2013**, 1 (1), DOI: 10.1063/1.4812323.
- (12) Divilov, S.; Eckert, H.; Hicks, D.; Oses, C.; Toher, C.; Friedrich, R.; Esters, M.; Mehl, M. J.; Zettel, A. C.; Lederer, Y.; Zurek, E.; Maria, J.-P.; Brenner, D. W.; Campilongo, X.; Filipović, S.; Fahrenholtz, W. G.; Ryan, C. J.; DeSalle, C. M.; Creales, R. J.; Wolfe, D. E.; Calzolari, A.; Curtarolo, S. Disordered enthalpy–entropy descriptor for high-entropy ceramics discovery. *Nature* **2024**, 625 (7993), 66-73, DOI: 10.1038/s41586-023-06786-y.
- (13) Jung, J.; Yun, Y.; Yang, S. W.; Oh, H. G.; Jeon, A. Y.; Nam, Y.; Heo, Y.-W.; Chae, W.-S.; Lee, S. Ternary diagrams of phase, stability, and optical properties of cesium lead mixed-halide perovskites. *Acta Materialia* **2023**, 246, 118661, DOI: 10.1016/j.actamat.2022.118661.
- (14) Zhang, W.; Liu, H.; Qu, Y.; Cui, J.; Zhang, W.; Shi, T.; Wang, H.-L. B-Site Co-Doping Coupled with Additive Passivation Pushes the Efficiency of Pb–Sn Mixed Inorganic Perovskite Solar Cells to Over 17%. *Advanced Materials* **2023**, n/a (n/a), 2309193, DOI: 10.1002/adma.202309193.
- (15) Baek, S.; Kim, S.; Noh, J. Y.; Heo, J. H.; Im, S. H.; Hong, K.-H.; Kim, S.-W. Development of Mixed-Cation Cs<sub>x</sub>Rb<sub>1-x</sub>PbX<sub>3</sub> Perovskite Quantum Dots and Their Full-Color Film with High Stability and Wide Color Gamut. *Advanced Optical Materials* **2018**, 6 (15), 1800295, DOI: 10.1002/adom.201800295.
- (16) Zirak, M.; Moya, E.; Alehdaghi, H.; Kanwat, A.; Choi, W.-C.; Jang, J. Anion- and Cation-Codoped All-Inorganic Blue-Emitting Perovskite Quantum Dots for Light-Emitting Diodes. *ACS Applied Nano Materials* **2019**, 2 (9), 5655-5662, DOI: 10.1021/acsanm.9b01187.
- (17) Stand, L.; Zhuravleva, M.; Chakoumakos, B.; Wei, H.; Johnson, J.; Martin, V.; Loyd, M.; Rutstrom, D.; McAlexander, W.; Wu, Y.; Koschan, M.; Melcher, C. L. Characterization of

- mixed halide scintillators: CsSrBrI<sub>2</sub>:Eu, CsCaBrI<sub>2</sub>:Eu and CsSrClBr<sub>2</sub>:Eu. *Journal of Luminescence* **2019**, *207*, 70-77, DOI: 10.1016/j.jlumin.2018.10.108.
- (18) Wen, T.; Gu, G.; Wang, B.; Zhang, W.; Wang, R. Cyan-rich sunlight-like spectra from Mn<sup>2+</sup>-doped CsCd(Cl<sub>1-y</sub>Br<sub>y</sub>)<sub>3</sub> perovskites with dual tunable emissions and high stability. *Journal of Materials Chemistry C* **2023**, *11* (21), 6989-6998, DOI: 10.1039/D2TC05455H.
- (19) Ji, Y.; Wang, M.; Yang, Z.; Wang, H.; Padhiar, M. A.; Shi, J.; Qiu, H.; Bhatti, A. S. In Situ Synthesis of UltraStable TiO<sub>2</sub> Coating Rb<sup>+</sup>-Doped Red Emitting CsPbBrI<sub>2</sub> Perovskite Quantum Dots. *The Journal of Physical Chemistry C* **2022**, *126* (3), 1542-1551, DOI: 10.1021/acs.jpcc.1c09945.
- (20) Lin, Y.-H.; Qiu, Z.-H.; Wang, S.-H.; Zhang, X.-H.; Wu, S.-F. All-inorganic Rb<sub>x</sub>Cs<sub>1-x</sub>PbBrI<sub>2</sub> perovskite nanocrystals with wavelength-tunable properties for red light-emitting. *Inorganic Chemistry Communications* **2019**, *103*, 47-52, DOI: 10.1016/j.inoche.2019.03.007.
- (21) Lee, S.; Moon, J.; Ryu, J.; Parida, B.; Yoon, S.; Lee, D.-G.; Cho, J. S.; Hayase, S.; Kang, D.-W. Inorganic narrow bandgap CsPb<sub>0.4</sub>Sn<sub>0.6</sub>I<sub>2.4</sub>Br<sub>0.6</sub> perovskite solar cells with exceptional efficiency. *Nano Energy* **2020**, *77*, 105309, DOI: 10.1016/j.nanoen.2020.105309.
- (22) Li, N.; Zhu, Z.; Li, J.; Jen, A. K.-Y.; Wang, L. Inorganic CsPb<sub>1-x</sub>Sn<sub>x</sub>IBr<sub>2</sub> for Efficient Wide-Bandgap Perovskite Solar Cells. *Advanced Energy Materials* **2018**, *8* (22), 1800525, DOI: 10.1002/aenm.201800525.
- (23) Shang, Y.; Li, X.; Lian, W.; Jiang, X.; Wang, X.; Chen, T.; Xiao, Z.; Wang, M.; Lu, Y.; Yang, S. Lead acetate as a superior lead source enables highly efficient and stable all-inorganic lead-tin perovskite solar cells. *Chemical Engineering Journal* **2023**, *457*, 141246, DOI: 10.1016/j.cej.2022.141246.
- (24) Wen, Q.; Duan, C.; Zou, F.; Luo, D.; Li, J.; Liu, Z.; Wang, J.; Yan, K. All-inorganic CsPb<sub>1-x</sub>Sn<sub>x</sub>I<sub>2</sub>Br perovskites mediated by dicyandiamide additive for efficient 4-terminal tandem solar cell. *Chemical Engineering Journal* **2023**, *452*, 139697, DOI: 10.1016/j.cej.2022.139697.
- (25) Zhang, W.; Liu, H.; Qi, X.; Yu, Y.; Zhou, Y.; Xia, Y.; Cui, J.; Shi, Y.; Chen, R.; Wang, H.-L. Oxalate Pushes Efficiency of CsPb<sub>0.7</sub>Sn<sub>0.3</sub>IBr<sub>2</sub> Based All-Inorganic Perovskite Solar Cells to over 14%. *Advanced Science* **2022**, *9* (11), 2106054, DOI: 10.1002/advs.202106054.
- (26) Zhang, Z.; Dai, L.; Zhang, M.; Ban, H.; Liu, Z.; Yu, H.; Gu, A.; Zhang, X.-L.; Chen, S.; Wang, Y.; Shen, Y.; Wang, M. Surface Modification in CsPb<sub>0.5</sub>Sn<sub>0.5</sub>I<sub>2</sub>Br Inorganic Perovskite Solar Cells: Effects of Bifunctional Dipolar Molecules on Photovoltaic Performance. *ACS Applied Materials & Interfaces* **2023**, *15* (30), 36594-36601, DOI: 10.1021/acsami.3c07018.
- (27) Yang, F.; Hirotsu, D.; Kapil, G.; Kamarudin, M. A.; Ng, C. H.; Zhang, Y.; Shen, Q.; Hayase, S. All-Inorganic CsPb<sub>1-x</sub>Ge<sub>x</sub>I<sub>2</sub>Br Perovskite with Enhanced Phase Stability and Photovoltaic Performance. *Angewandte Chemie International Edition* **2018**, *57* (39), 12745-12749, DOI: 10.1002/anie.201807270.
- (28) Hu, Y.; Zhang, Y.; Yang, C.; Li, J.; Wang, L. The cation–anion co-exchange in CsPb<sub>1-x</sub>Fe<sub>x</sub>(Br<sub>1-y</sub>Cl<sub>y</sub>)<sub>3</sub> nanocrystals prepared using a hot injection method. *RSC Advances* **2020**, *10* (55), 33080-33085, DOI: 10.1039/D0RA06238C.
- (29) Wu, C.; Li, Y.; Xia, Z.; Ji, C.; Tang, Y.; Zhang, J.; Ma, C.; Gao, J. Enhancing Photoluminescence of CsPb(Cl<sub>x</sub>Br<sub>1-x</sub>)<sub>3</sub> Perovskite Nanocrystals by Fe<sup>2+</sup> Doping. *Nanomaterials* **2023**, *13* (3), 533, DOI: 10.3390/nano13030533.
- (30) Naresh, V.; Lee, N. Zn(II)-Doped Cesium Lead Halide Perovskite Nanocrystals with High Quantum Yield and Wide Color Tunability for Color-Conversion Light-Emitting Displays. *ACS Applied Nano Materials* **2020**, *3* (8), 7621-7632, DOI: 10.1021/acsanm.0c01254.

- (31) Sun, H.; Zhang, J.; Gan, X.; Yu, L.; Yuan, H.; Shang, M.; Lu, C.; Hou, D.; Hu, Z.; Zhu, Y.; Han, L. Pb-Reduced CsPb<sub>0.9</sub>Zn<sub>0.1</sub>I<sub>2</sub>Br Thin Films for Efficient Perovskite Solar Cells. *Advanced Energy Materials* **2019**, *9* (25), 1900896, DOI: 10.1002/aenm.201900896.
- (32) Wang, T.; Chen, H.; Yang, Z.; Liang, J.; Dai, S. High-Entropy Perovskite Fluorides: A New Platform for Oxygen Evolution Catalysis. *Journal of the American Chemical Society* **2020**, *142* (10), 4550-4554, DOI: 10.1021/jacs.9b12377.
- (33) Belyaev, I. N.; Shurginov, E. A. *Zhurnal Neorganicheskoy Khimii* **1970**, *15*, 1401.
- (34) Ghaithan, H. M.; Qaid, S. M. H.; Alahmed, Z. A.; Hezam, M.; Lyras, A.; Amer, M.; Aldwayyan, A. S. Anion Substitution Effects on the Structural, Electronic, and Optical Properties of Inorganic CsPb(I<sub>1-x</sub>Br<sub>x</sub>)<sub>3</sub> and CsPb(Br<sub>1-x</sub>Cl<sub>x</sub>)<sub>3</sub> Perovskites: Theoretical and Experimental Approaches. *The Journal of Physical Chemistry C* **2021**, *125* (1), 886-897, DOI: 10.1021/acs.jpcc.0c07983.
- (35) Ghaithan, H. M.; Qaid, S. M. H.; AlHarbi, K. K.; Bin Ajaj, A. F.; Al-Asbahi, B. A.; Aldwayyan, A. S. Amplified Spontaneous Emission from Thermally Evaporated High-Quality Thin Films of CsPb(Br<sub>1-x</sub>Y<sub>x</sub>)<sub>3</sub> (Y = I, Cl) Perovskites. *Langmuir* **2022**, *38* (28), 8607-8613, DOI: 10.1021/acs.langmuir.2c00861.
- (36) Jellicoe, T. C.; Richter, J. M.; Glass, H. F. J.; Tabachnyk, M.; Brady, R.; Dutton, S. E.; Rao, A.; Friend, R. H.; Credgington, D.; Greenham, N. C.; Böhm, M. L. Synthesis and Optical Properties of Lead-Free Cesium Tin Halide Perovskite Nanocrystals. *Journal of the American Chemical Society* **2016**, *138* (9), 2941-2944, DOI: 10.1021/jacs.5b13470.
- (37) Peedikakkandy, L.; Bhargava, P. Composition dependent optical, structural and photoluminescence characteristics of cesium tin halide perovskites. *RSC Advances* **2016**, *6* (24), 19857-19860, DOI: 10.1039/C5RA22317B.
- (38) Scaife, D. E.; Weller, P. F.; Fisher, W. G. Crystal preparation and properties of cesium tin(II) trihalides. *Journal of Solid State Chemistry* **1974**, *9* (3), 308-314, DOI: 10.1016/0022-4596(74)90088-7.
- (39) Sharma, S.; Weiden, N.; Weiss, A. Phase Diagrams Of Quasibinary Systems Of The Type: Abx<sub>3</sub>-A'bx<sub>3</sub>; Abx<sub>3</sub> - Ab'x<sub>3</sub> And Abx<sub>3</sub> - Abx'<sub>3</sub>; X = Halogen. *Zeitschrift für physikalische Chemie* **1992**, *175* (1), 63-80.
- (40) Lin, Z.-G.; Tang, L.-C.; Chou, C.-P. Infrared properties of CsGe(Br<sub>x</sub>Cl<sub>1-x</sub>)<sub>3</sub>, nonlinear optical rhombohedral semiconductor. *Journal of Physics: Condensed Matter* **2007**, *19* (47), 476209, DOI: 10.1088/0953-8984/19/47/476209.
- (41) Lin, Z.-G.; Tang, L.-C.; Chou, C.-P. Characterization and properties of infrared NLO crystals: AGeX<sub>3</sub> (A=Rb, Cs; X=Cl, Br). *Journal of Crystal Growth* **2008**, *310* (13), 3224-3229, DOI: 10.1016/j.jcrysgro.2008.03.018.
- (42) Lüthi, S. R.; Riley, M. J. Ni(II)-Doped CsCdBrCl<sub>2</sub>: Variation of Spectral and Structural Properties via Mixed-Halide Coordination. *Inorganic Chemistry* **2001**, *40* (2), 196-207, DOI: 10.1021/ic000899l.
- (43) Plokker, M. P.; Biner, D. A.; Dusoswa, N.; Dorenbos, P.; Krämer, K. W.; Van Der Kolk, E. Photoluminescence and excited states dynamics of Tm<sup>2+</sup>-doped CsCa(Cl/Br)<sub>3</sub> and CsCa(Br/I)<sub>3</sub> perovskites. *Journal of Physics: Materials* **2021**, *4* (4), 045004, DOI: 10.1088/2515-7639/ac24ed.
- (44) Li, Y.; Ding, R.; Jia, Z.; Yu, W.; Wang, A.; Liu, M.; Yang, F.; Zhang, Y.; Fang, Q.; Yan, M.; Xie, J.; Sun, X.; Liu, E. Unlocking the intrinsic mechanisms of A-site K/Na doped perovskite fluorides pseudocapacitive cathode materials for enhanced aqueous zinc-based batteries. *Energy Storage Materials* **2023**, *57*, 334-345, DOI: 10.1016/j.ensm.2023.02.020.

- (45) Näsström, H.; Becker, P.; Márquez, J. A.; Shargaieva, O.; Mainz, R.; Unger, E.; Unold, T. Dependence of phase transitions on halide ratio in inorganic CsPb(Br<sub>x</sub>I<sub>1-x</sub>)<sub>3</sub> perovskite thin films obtained from high-throughput experimentation. *Journal of Materials Chemistry A* **2020**, *8* (43), 22626-22631, DOI: 10.1039/D0TA08067E.
- (46) Yuan, L.; Yuan, M.; Xu, H.; Hou, C.; Meng, X. Moisture-stimulated reversible thermochromic CsPbI<sub>3-x</sub>Br<sub>x</sub> films: In-situ spectroscopic-resolved structure and optical properties. *Applied Surface Science* **2022**, *573*, 151484, DOI: 10.1016/j.apsusc.2021.151484.
- (47) Natta, G.; Passerini, L. Isomorfismo, polimorfismo e morfotropia I. Composti del tipo ABX<sub>3</sub>. *Gazzetta Chimica Italiana* **1928**, *58*, 472-484.
- (48) Bontemps, N.; Grisolia, C.; Nerozzi, M.; Briat, B. Optical and magneto-optical study of the magnetic properties of RbFeCl<sub>3</sub>, RbFeBr<sub>3</sub>, and disordered materials of intermediate composition. *Journal of Applied Physics* **1982**, *53* (3), 2710-2712, DOI: 10.1063/1.330940.
- (49) Harrison, A.; Visser, D. Magnetic ordering effects in the random mixed one-dimensional ferromagnet-antiferromagnet system RbFeCl<sub>3-x</sub>Br<sub>x</sub>. *Journal of Physics: Condensed Matter* **1989**, *1* (4), 733, DOI: 10.1088/0953-8984/1/4/008.
- (50) Beck, H. P.; Schramm, M.; Haberkorn, R. The InSnCl<sub>3</sub>-Type Arrangement: II. High Pressure Synthesis of TIPbCl<sub>3</sub> and of Solid Solutions Containing Rb or Br. *Journal of Solid State Chemistry* **1999**, *146* (2), 351-354, DOI: 10.1006/jssc.1999.8361.
- (51) Wang, A.; Ding, R.; Li, Y.; Liu, M.; Yang, F.; Zhang, Y.; Fang, Q.; Yan, M.; Xie, J.; Chen, Z.; Yan, Z.; He, Y.; Guo, J.; Sun, X.; Liu, E. Redox Electrolytes-Assisting Aqueous Zn-Based Batteries by Pseudocapacitive Multiple Perovskite Fluorides Cathode and Charge Storage Mechanisms. *Small* **2023**, *n/a* (n/a), 2302333, DOI: 10.1002/smll.202302333.
- (52) Yan, T.; Ding, R.; Huang, Y.; Ying, D.; Tan, C.; Huang, Y.; Yang, F.; Sun, X.; Gao, P.; Liu, E. A novel sodium-ion superbattery based on vacancy defective Ni-Co-Mn ternary perovskite fluoride electrode materials. *Journal of Materials Chemistry A* **2021**, *9* (25), 14276-14284, DOI: 10.1039/D1TA02894D.
- (53) Wang, T.; Fan, J.; Do-Thanh, C.-L.; Suo, X.; Yang, Z.; Chen, H.; Yuan, Y.; Lyu, H.; Yang, S.; Dai, S. Perovskite Oxide-Halide Solid Solutions: A Platform for Electrocatalysts. *Angewandte Chemie International Edition* **2021**, *60* (18), 9953-9958, DOI: 10.1002/anie.202101120.
- (54) Wang, X.; Liu, G.; Tang, C.; Tang, H.; Zhang, W.; Ju, Z.; Jiang, J.; Zhuang, Q.; Cui, Y. A novel high entropy perovskite fluoride anode with 3D cubic framework for advanced lithium-ion battery. *Journal of Alloys and Compounds* **2023**, *934*, 167889, DOI: 10.1016/j.jallcom.2022.167889.
- (55) Jia, Z.; Ding, R.; Yu, W.; Li, Y.; Wang, A.; Liu, M.; Yang, F.; Sun, X.; Liu, E. Unraveling the Charge Storage and Activity-Enhancing Mechanisms of Zn-Doping Perovskite Fluorides and Engineering the Electrodes and Electrolytes for Wide-Temperature Aqueous Supercapacitors. *Advanced Functional Materials* **2022**, *32* (1), 2107674, DOI: 10.1002/adfm.202107674.
- (56) Yang, F.; Ding, R.; Jia, Z.; Yu, W.; Li, Y.; Wang, A.; Liu, M.; Xie, J.; Yan, M.; Fang, Q.; Zhang, Y.; Sun, X.; Liu, E. High specific energy and power sodium-based dual-ion supercapacitors by pseudocapacitive Ni-Zn-Mn ternary perovskite fluorides@reduced graphene oxides anodes with conversion-alloying-intercalation triple mechanisms. *Energy Storage Materials* **2022**, *53*, 222-237, DOI: 10.1016/j.ensm.2022.08.049.
- (57) Yu, W.; Ding, R.; Jia, Z.; Li, Y.; Wang, A.; Liu, M.; Yang, F.; Sun, X.; Liu, E. Pseudocapacitive Co-Free Trimetallic Ni-Zn-Mn Perovskite Fluorides Enable Fast-Rechargeable

- Zn-Based Aqueous Batteries. *Advanced Functional Materials* **2022**, *32* (19), 2112469, DOI: 10.1002/adfm.202112469.
- (58) Huang, Y.; Ding, R.; Ying, D.; Huang, Y.; Tan, C.; Yan, T.; Sun, X.; Liu, E. A F-deficient and high-Mn ternary perovskite fluoride anode with a dominant conversion mechanism for advanced Li-ion batteries. *Chemical Communications* **2021**, *57* (62), 7705-7708, DOI: 10.1039/D1CC00910A.
- (59) Huang, Y.-F.; Ding, R.; Ying, D.-F.; Huang, Y.-X.; Yan, T.; Tan, C.-N.; Sun, X.-J.; Liu, E.-H. A novel Li-ion supercapattery by K-ion vacant ternary perovskite fluoride anode with pseudocapacitive conversion/insertion dual mechanisms. *Rare Metals* **2022**, *41* (7), 2491-2504, DOI: 10.1007/s12598-022-01979-2.
- (60) Jia, Z.; Shi, W.; Ding, R.; Yu, W.; Li, Y.; Tan, C.; Sun, X.; Liu, E. Conversion-type NiCoMn triple perovskite fluorides for advanced aqueous supercapacitors, batteries and supercapatteries. *Chemical Communications* **2021**, *57* (64), 7962-7965, DOI: 10.1039/D1CC02488D.
- (61) Shi, W.; Yu, W.; Ding, R.; Jia, Z.; Li, Y.; Huang, Y.; Tan, C.; Sun, X.; Liu, E. Bipolar redox electrolyte-synergistically mediated NiCoMn-811 high-Ni ternary perovskite fluorides for advanced supercapacitors in both alkaline and neutral media. *Journal of Materials Chemistry A* **2021**, *9* (15), 9624-9633, DOI: 10.1039/D1TA01156A.
- (62) Tan, C.; Ding, R.; Huang, Y.; Yan, T.; Huang, Y.; Yang, F.; Sun, X.; Gao, P.; Liu, E. A vacancy-rich perovskite fluoride  $K_{0.79}Ni_{0.25}Co_{0.36}Mn_{0.39}F_{2.83}@rGO$  anode for advanced Na-based dual-ion batteries. *Chemical Communications* **2021**, *57* (47), 5830-5833, DOI: 10.1039/D1CC01477C.
- (63) Yan, T.; Huang, Y.; Ding, R.; Shi, W.; Ying, D.; Jia, Z.; Tan, C.; Huang, Y.; Sun, X.; Liu, E. Pseudocapacitive trimetallic NiCoMn-111 perovskite fluorides for advanced Li-ion supercapatteries. *Nanoscale Advances* **2021**, *3* (19), 5703-5710, DOI: 10.1039/D1NA00329A.
- (64) Ying, D.; Li, Y.; Ding, R.; Shi, W.; Xu, Q.; Huang, Y.; Jia, Z.; Yu, W.; Sun, X.; Gao, P.; Liu, E.; Wang, X. Nanosilver-Promoted Trimetallic Ni-Co-Mn Perovskite Fluorides for Advanced Aqueous Supercapatteries with Pseudocapacitive Multielectrons Phase Conversion Mechanisms. *Advanced Functional Materials* **2021**, *31* (24), 2101353, DOI: 10.1002/adfm.202101353.
- (65) Mao, H.; Wang, L.; Li, J.; Jiang, X.; Xue, S.; Li, M.; Zhu, J.; Fan, B.; Xu, T.; Shao, G.; Xu, H.; Wang, H.; Zhang, R.; Lu, H. High-Entropy  $Cs(Pb_{1/3}Mn_{1/3}Ni_{1/3})Br_3$  Perovskite Nanocrystals Prepared by High Energy Ball Milling and their Luminescence Properties. *Particle & Particle Systems Characterization* **2022**, *39* (9), 2200073, DOI: 10.1002/ppsc.202200073.
- (66) Amgar, D.; Binyamin, T.; Uvarov, V.; Etgar, L. Near ultra-violet to mid-visible band gap tuning of mixed cation  $Rb_xCs_{1-x}PbX_3$  ( $X = Cl$  or  $Br$ ) perovskite nanoparticles. *Nanoscale* **2018**, *10* (13), 6060-6068, DOI: 10.1039/C7NR09607K.
- (67) Linaburg, M. R.; McClure, E. T.; Majher, J. D.; Woodward, P. M.  $Cs_{1-x}Rb_xPbCl_3$  and  $Cs_{1-x}Rb_xPbBr_3$  Solid Solutions: Understanding Octahedral Tilting in Lead Halide Perovskites. *Chemistry of Materials* **2017**, *29* (8), 3507-3514, DOI: 10.1021/acs.chemmater.6b05372.
- (68) Jia, W.; Wei, Q.; Ge, S.; Peng, C.; Huang, T.; Yao, S.; Tian, Y.; Chang, T.; Zeng, R.; Zou, B. Polaronic Magnetic Excitons and Photoluminescence in  $Mn^{2+}$ -Doped  $CsCdBr_3$  Metal Halides. *The Journal of Physical Chemistry C* **2021**, *125* (32), 18031-18039, DOI: 10.1021/acs.jpcc.1c05127.

- (69) Lahoz, F.; Alonso, P. J.; Villacampa, B.; Alcalá, R. Spectroscopic properties of  $Mn^{2+}$  ions in mixed fluoroperovskites. *Radiation Effects and Defects in Solids* **1995**, *135* (1-4), 163-167, DOI: 10.1080/10420159508229827.
- (70) Lahoz, F.; Díaz, M.; Villacampa, B.; Cases, R.; Alcalá, R. Influence of the host lattice on the photoluminescence of  $Ni^{2+}$  ions in  $Rb_{1-x}Cs_xCaF_3$  and  $RbCa_{1-x}Cd_xF_3$  crystals. *Journal of Applied Physics* **1997**, *82* (10), 5121-5125, DOI: 10.1063/1.366314.
- (71) Ghigna, P.; Scavini, M.; Mazzoli, C.; Brunelli, M.; Laurenti, C.; Ferrero, C. Experimental disentangling of orbital and lattice energy scales by inducing cooperative Jahn-Teller melting in  $KCu_{1-x}Mg_xF_3$  solid solutions. *Physical Review B* **2010**, *81* (7), 073107, DOI: 10.1103/PhysRevB.81.073107.
- (72) Oliva, C.; Scavini, M.; Cappelli, S.; Bottalo, C.; Mazzoli, C.; Ghigna, P. Melting of Orbital Ordering in  $KMg_xCu_{1-x}F_3$  Solid Solution. *The Journal of Physical Chemistry B* **2007**, *111* (21), 5976-5983, DOI: 10.1021/jp067539p.
- (73) Fleury, P. A.; Hayes, W.; Guggenheim, H. J. Magnetic scattering of light in  $K(NiMg)F_3$ . *Journal of Physics C: Solid State Physics* **1975**, *8* (13), 2183, DOI: 10.1088/0022-3719/8/13/027.
- (74) Karmakar, A.; Bhattacharya, A.; Bernard, G. M.; Mar, A.; Michaelis, V. K. Revealing the Local Sn and Pb Arrangements in  $CsSn_xPb_{1-x}Br_3$  Perovskites with Solid-State NMR Spectroscopy. *ACS Materials Letters* **2021**, *3* (3), 261-267, DOI: 10.1021/acsmaterialslett.0c00596.
- (75) Zhang, X.; Cao, W.; Wang, W.; Xu, B.; Liu, S.; Dai, H.; Chen, S.; Wang, K.; Sun, X. W. Efficient light-emitting diodes based on green perovskite nanocrystals with mixed-metal cations. *Nano Energy* **2016**, *30*, 511-516, DOI: 10.1016/j.nanoen.2016.10.039.
- (76) Suzuki, T.; Guo, H.; Kawasaki, I.; Watanabe, I.; Goto, T.; Katayama, K.; Tanaka, H. Disappearance of Gapped Mott Insulating Phase Neighboring Bose Glass Phase in  $Tl_{1-x}K_xCuCl_3$  Detected by Longitudinal-Field Muon Spin Relaxation. *Journal of the Physical Society of Japan* **2014**, *83* (8), 084703, DOI: 10.7566/JPSJ.83.084703.
- (77) Suzuki, T.; Yamada, F.; Watanabe, I.; Goto, T.; Oosawa, A.; Tanaka, H. Bond-randomness effect on the quantum spin system  $Tl_{1-x}K_xCuCl_3$  probed by muon-spin-relaxation method. *Physica B: Condensed Matter* **2009**, *404* (5), 590-593, DOI: 10.1016/j.physb.2008.11.108.
- (78) Yamada, F.; Tanaka, H.; Ono, T.; Nojiri, H. Transition from Bose glass to a condensate of triplons in  $Tl_{1-x}K_xCuCl_3$ . *Physical Review B* **2011**, *83* (2), 020409, DOI: 10.1103/PhysRevB.83.020409.
- (79) Chartrand, P.; Pelton, A. D. Thermodynamic Evaluation and Optimization of the  $LiCl-NaCl-KCl-RbCl-CsCl-MgCl_2-CaCl_2-SrCl_2$  System Using The Modified Quasichemical Model. *Canadian Metallurgical Quarterly* **2000**, *39* (4), 405-420, DOI: 10.1179/cmqr.2000.39.4.405.
- (80) Chornodolskyy, Y.; Stryganyuk, G.; Syrotyuk, S.; Voloshinovskii, A.; Rodnyi, P. Features of the core-valence luminescence and electron energy band structure of  $A_{1-x}Cs_xCaCl_3$  ( $A = K, Rb$ ) crystals. *Journal of Physics: Condensed Matter* **2007**, *19* (47), 476211, DOI: 10.1088/0953-8984/19/47/476211.
- (81) Takahashi, K.; Koshimizu, M.; Fujimoto, Y.; Yanagida, T.; Asai, K. Auger-free luminescence characteristics of  $Rb_{1-x}Cs_xCaCl_3$ . *Journal of the Ceramic Society of Japan* **2018**, *126* (10), 755-760, DOI: 10.2109/jcersj2.18051.
- (82) Vaněček, V.; Páterek, J.; Král, R.; Kučerková, R.; Babin, V.; Rohlíček, J.; Cala, R.; Kratochwil, N.; Auffray, E.; Nikl, M. (INVITED) Ultraviolet cross-luminescence in ternary chlorides of alkali and alkaline-earth metals. *Optical Materials: X* **2021**, *12*, 100103, DOI: 10.1016/j.omx.2021.100103.

- (83) Dong, Q.; Tian, B.; Zhang, W.; He, L. Facile synthesis of  $K_aCs_{1-a}PbBr_3@$  molecular sieve SBA-15 composite with improved luminescence and wet/thermal stability. *Colloids and Surfaces A: Physicochemical and Engineering Aspects* **2022**, *648*, 129258, DOI: 10.1016/j.colsurfa.2022.129258.
- (84) Shao, G.; Liu, S.; Ding, L.; Zhang, Z.; Xiang, W.; Liang, X.  $K_xCs_{1-x}PbBr_3$  NCs glasses possessing super optical properties and stability for white light emitting diodes. *Chemical Engineering Journal* **2019**, *375*, 122031, DOI: 10.1016/j.cej.2019.122031.
- (85) Dintakurti, S. H. S. S. Phase evolution and local structure in  $[Cs, MA][Pb, Sr][Cl, Br]_3$  perovskites. Doctoral Nanyang Technological University, 2021.
- (86) Dance, J.-M.; Grannec, J.; Tressand, A. *Comptes rendus de l'Académie des Sciences* **1975**, *C281*, 91.
- (87) Hu, M.; Chen, M.; Guo, P.; Zhou, H.; Deng, J.; Yao, Y.; Jiang, Y.; Gong, J.; Dai, Z.; Zhou, Y.; Qian, F.; Chong, X.; Feng, J.; Schaller, R. D.; Zhu, K.; Padture, N. P.; Zhou, Y. Sub-1.4eV bandgap inorganic perovskite solar cells with long-term stability. *Nature Communications* **2020**, *11* (1), 151, DOI: 10.1038/s41467-019-13908-6.
- (88) Hu, M.; Zhang, Y.; Gong, J.; Zhou, H.; Huang, X.; Liu, M.; Zhou, Y.; Yang, S. Surface Sn(IV) Hydrolysis Improves Inorganic Sn–Pb Perovskite Solar Cells. *ACS Energy Letters* **2023**, *8* (2), 1035-1041, DOI: 10.1021/acsenergylett.2c02435.
- (89) Liu, M.; Pasanen, H.; Ali-Löyty, H.; Hiltunen, A.; Lahtonen, K.; Qudisia, S.; Smått, J.-H.; Valden, M.; Tkachenko, N. V.; Vivo, P. B-Site Co-Alloying with Germanium Improves the Efficiency and Stability of All-Inorganic Tin-Based Perovskite Nanocrystal Solar Cells. *Angewandte Chemie International Edition* **2020**, *59* (49), 22117-22125, DOI: 10.1002/anie.202008724.
- (90) Borsa, F.; Benard, D. J.; Walker, W. C.; Baviera, A. NMR and birefringence study of structural transitions in disordered crystals:  $Rb_xK_{1-x}MnF_3$ . *Physical Review B* **1977**, *15* (1), 84-94, DOI: 10.1103/PhysRevB.15.84.
- (91) Cousseins, J. C. Etude dans l'état solide de quelques fluorures ternaires: Synthèse; identification; filiation; miscibilité. *Rev. chim. minér* **1964**, *1*, 573-616.
- (92) Kapusta, J.; Ph, D.; Ratuszna, A. Vibrational investigation and phase transitions in the  $KMnF_3$  doped perovskite crystals ( $Li^+$ ,  $Na^+$ ,  $Rb^+$  and  $Cs^+$ ). *Journal of Physics: Condensed Matter* **2002**, *14* (21), 5433, DOI: 10.1088/0953-8984/14/21/317.
- (93) Todorović, P.; Ma, D.; Chen, B.; Quintero-Bermudez, R.; Saidaminov, M. I.; Dong, Y.; Lu, Z.-H.; Sargent, E. H. Spectrally Tunable and Stable Electroluminescence Enabled by Rubidium Doping of  $CsPbBr_3$  Nanocrystals. *Advanced Optical Materials* **2019**, *7* (24), 1901440, DOI: 10.1002/adom.201901440.
- (94) Wu, H.; Yang, Y.; Zhou, D.; Li, K.; Yu, J.; Han, J.; Li, Z.; Long, Z.; Ma, J.; Qiu, J.  $Rb^+$  cations enable the change of luminescence properties in perovskite ( $Rb_xCs_{1-x}PbBr_3$ ) quantum dots. *Nanoscale* **2018**, *10* (7), 3429-3437, DOI: 10.1039/C7NR07776A.
- (95) Lahoz, F.; Villacampa, B.; Alcalá, R.; Marquina, C.; Ibarra, M. R. Cubic-to-tetragonal structural phase transition in  $Rb_{1-x}Cs_xCaF_3$  solid solutions: Thermal expansion and EPR studies. *Physical Review B* **1997**, *55* (13), 8148-8154, DOI: 10.1103/PhysRevB.55.8148.
- (96) Deng, J.; Xun, J.; Shen, W.; Li, M.; He, R. Phase Regulation of  $CsPb_2Br_5/CsPbBr_3$  Perovskite Nanocrystals by Doping with Divalent Cations: Implications for Optoelectronic Devices with Enhanced Stability and Reduced Toxicity. *ACS Applied Nano Materials* **2021**, *4* (9), 9213-9222, DOI: 10.1021/acsanm.1c01737.

- (97) Straus, D. B.; Cava, R. J. Tuning the Band Gap in the Halide Perovskite CsPbBr<sub>3</sub> through Sr Substitution. *ACS Applied Materials & Interfaces* **2022**, *14* (30), 34884-34890, DOI: 10.1021/acsmami.2c09275.
- (98) Tanaka, H.; Iio, K.; Nagata, K. Magnetic properties of Rb<sub>1-x</sub>K<sub>x</sub>NiCl<sub>3</sub>, RbVBr<sub>3</sub> and CsNiI<sub>3</sub>. *Journal of Magnetism and Magnetic Materials* **1992**, *104-107*, 829-830, DOI: 10.1016/0304-8853(92)90380-7.
- (99) Bernasconi, A.; Rizzo, A.; Listorti, A.; Mahata, A.; Mosconi, E.; De Angelis, F.; Malavasi, L. Synthesis, Properties, and Modeling of Cs<sub>1-x</sub>Rb<sub>x</sub>SnBr<sub>3</sub> Solid Solution: A New Mixed-Cation Lead-Free All-Inorganic Perovskite System. *Chemistry of Materials* **2019**, *31* (9), 3527-3533, DOI: 10.1021/acs.chemmater.9b00837.
- (100) Daniel, P.; Toulouse, J.; Rousseau, M. Phase transitions in mixed disordered crystals Rb<sub>1-x</sub>K<sub>x</sub>CaF<sub>3</sub> (0 < x < 1) investigated by Raman spectroscopy. *Eur. Phys. J. AP* **1999**, *5* (1), 33-44, DOI: 10.1051/epjap:1999109.
- (101) Jouanneaux, A.; Ph, D.; Bushnell-Wye, G. Structural instabilities in disordered perovskites studied by synchrotron radiation powder diffraction. Proposition for a phase diagram. *Journal of Physics: Condensed Matter* **1998**, *10* (24), 5485, DOI: 10.1088/0953-8984/10/24/024.
- (102) Rebrova, N. V.; Grippa, A. Y.; Boiaryntseva, I. A.; Berastegui, P.; Gorbacheva, T. E.; Datsko, Y. N.; Rebrov, A. L.; Dujardin, C.; Calà, R.; Martinazzoli, L.; Auffray, E.; Kononets, V. V. Effects of europium concentration on luminescent and scintillation performance of Cs<sub>0.2</sub>Rb<sub>0.8</sub>Ca<sub>1-x</sub>Eu<sub>x</sub>Br<sub>3</sub> (0 ≤ x ≤ 0.08) crystals. *Journal of Rare Earths* **2022**, *40* (1), 29-33, DOI: 10.1016/j.jre.2020.08.012.
- (103) Rebrova, N. V.; Grippa, A. Y.; Boiaryntseva, I. A.; Berastegui, P.; Gorbacheva, T. E.; Pedash, V. Y.; Galkin, S. N.; Kononets, V. V.; Datsko, Y. N.; Cherginets, V. L. Crystal growth and characterization of Eu<sup>2+</sup> doped Cs<sub>1-x</sub>Rb<sub>x</sub>CaBr<sub>3</sub>. *Journal of Alloys and Compounds* **2020**, *816*, 152594, DOI: 10.1016/j.jallcom.2019.152594.
- (104) Hidaka, M.; Zhou, Z. Y.; Yamashita, S. Structural phase transitions in KCdF<sub>3</sub> and K<sub>0.5</sub>Rb<sub>0.5</sub>CdF<sub>3</sub>. *Phase Transitions* **1990**, *20* (1-2), 83-94, DOI: 10.1080/01411599008206869.
- (105) He, S.; Qiang, Q.; Lang, T.; Cai, M.; Han, T.; You, H.; Peng, L.; Cao, S.; Liu, B.; Jing, X.; Jia, B. Highly Stable Orange-Red Long-Persistent Luminescent CsCdCl<sub>3</sub>:Mn<sup>2+</sup> Perovskite Crystal. *Angewandte Chemie International Edition* **2022**, *61* (48), e202208937, DOI: 10.1002/anie.202208937.
- (106) Jia, W.; Wei, Q.; Yao, S.; Ge, S.; Peng, C.; Wang, L.; Zhong, X.; peng, H.; Zou, B. Magnetic coupling for highly efficient and tunable emission in CsCdX<sub>3</sub>:Mn perovskites. *Journal of Luminescence* **2023**, *257*, 119657, DOI: 10.1016/j.jlumin.2022.119657.
- (107) Wu, S.; Yuan, L.; Chen, G.; Peng, C.; Jin, Y. All-inorganic Mn<sup>2+</sup>-doped metal halide perovskite crystals for the late-time detection of X-ray afterglow imaging. *Nanoscale* **2023**, *15* (33), 13628-13634, DOI: 10.1039/D3NR02208K.
- (108) Men, L.; Rosales, B. A.; Gentry, N. E.; Cady, S. D.; Vela, J. Lead-Free Semiconductors: Soft Chemistry, Dimensionality Control, and Manganese-Doping of Germanium Halide Perovskites. *ChemNanoMat* **2019**, *5* (3), 334-339, DOI: 10.1002/cnma.201800497.
- (109) Ratuszna, A.; Kapusta, J. Structural phase transitions in KMnF<sub>3</sub> doped by Li<sup>+</sup>, Na<sup>+</sup> and Rb<sup>+</sup>. *Phase Transitions* **1997**, *62* (3), 181-198, DOI: 10.1080/01411599708220068.
- (110) Shafer, M. W.; McGuire, T. R. Preparation and properties of ferrimagnets in the RbMgF<sub>3</sub>-RbCoF<sub>3</sub> system. *Journal of Physics and Chemistry of Solids* **1969**, *30* (8), 1989-1997, DOI: 10.1016/0022-3697(69)90177-2.



- (111) Chen, M.; Ju, M.-G.; Garces, H. F.; Carl, A. D.; Ono, L. K.; Hawash, Z.; Zhang, Y.; Shen, T.; Qi, Y.; Grimm, R. L.; Pacifici, D.; Zeng, X. C.; Zhou, Y.; Padture, N. P. Highly stable and efficient all-inorganic lead-free perovskite solar cells with native-oxide passivation. *Nature Communications* **2019**, *10* (1), 16, DOI: 10.1038/s41467-018-07951-y.
- (112) Kama, A.; Tirosh, S.; Itzhak, A.; Ejgenberg, M.; Cahen, D. New Pb-Free Stable Sn–Ge Solid Solution Halide Perovskites Fabricated by Spray Deposition. *ACS Applied Energy Materials* **2022**, *5* (3), 3638-3646, DOI: 10.1021/acsaem.1c04115.
- (113) Lv, H.; Tang, X.; Chen, M. Ionic Doping of CsPbI<sub>3</sub> Perovskite Nanocrystals Improves Luminescence and Stability in Patterned Large-Area Light-Emitting Diodes. *ACS Applied Nano Materials* **2023**, *6* (20), 18918-18925, DOI: 10.1021/acsanm.3c03358.
- (114) Buyers, W. J. L.; Pepper, D. E.; Elliott, R. J. Theory of spin waves in disordered antiferromagnets. I. Application to (Mn, Co)F<sub>2</sub> and K(Mn, Co)F<sub>3</sub>. *Journal of Physics C: Solid State Physics* **1972**, *5* (18), 2611, DOI: 10.1088/0022-3719/5/18/011.
- (115) Dzyub, I. P. Cluster Theory of Spin Excitations of Mixed Antiferromagnets. Application to Mn<sub>c</sub>Co<sub>1-c</sub>F<sub>2</sub> and KMn<sub>c</sub>Co<sub>1-c</sub>F<sub>3</sub>. *physica status solidi (b)* **1974**, *66* (1), 339-347, DOI: 10.1002/pssb.2220660138.
- (116) Komura, H.; Shapiro, M. M.; Stevenson, R. Exciton-magnon cross excitation in the mixed substitutional system KMn<sub>1-x</sub>Co<sub>x</sub>F<sub>3</sub>. *Physical Review B* **1974**, *9* (8), 3266-3269, DOI: 10.1103/PhysRevB.9.3266.
- (117) Chakhmouradian, A. R.; Ross, K.; Mitchell, R. H.; Swainson, I. The crystal chemistry of synthetic potassium-bearing neighborite, (Na<sub>1-x</sub>K<sub>x</sub>)MgF<sub>3</sub>. *Physics and Chemistry of Minerals* **2001**, *28* (4), 277-284, DOI: 10.1007/s002690100151.
- (118) Chartrand, P.; Pelton, A. D. Thermodynamic evaluation and optimization of the LiF-NaF-KF-MgF<sub>2</sub>-CaF<sub>2</sub> system using the modified quasi-chemical model. *Metallurgical and Materials Transactions A* **2001**, *32* (6), 1385-1396, DOI: 10.1007/s11661-001-0228-1.
- (119) Martin, C. D.; Chaudhur, S.; Grey, C. P.; Parise, J. B. Effect of A-site cation radius on ordering of BX<sub>6</sub> octahedra in (K,Na)MgF<sub>3</sub> perovskite. *American Mineralogist* **2005**, *90* (10), 1522-1533, DOI: 10.2138/am.2005.1693.
- (120) Zhao, Y. Crystal Chemistry and Phase Transitions of Perovskite in P–T–X Space: Data for (K<sub>x</sub>Na<sub>1-x</sub>)MgF<sub>3</sub> Perovskites. *Journal of Solid State Chemistry* **1998**, *141* (1), 121-132, DOI: 10.1006/jssc.1998.7927.
- (121) Schmidt, R. E.; Welsch, M.; Kummer-Dörner, S.; Babel, D. Einkristallstrukturuntersuchungen an hexagonalen Fluorperowskiten AMIF<sub>3</sub> (MII=Mg, Mn, Fe, Co, Ni). *Zeitschrift für anorganische und allgemeine Chemie* **1999**, *625* (4), 637-642, DOI: 10.1002/(SICI)1521-3749(199904)625:4<637::AID-ZAAC637>3.0.CO;2-N.
- (122) Huang, X.; Hu, J.; Bi, C.; Yuan, J.; Lu, Y.; Sui, M.; Tian, J. B-site doping of CsPbI<sub>3</sub> quantum dot to stabilize the cubic structure for high-efficiency solar cells. *Chemical Engineering Journal* **2021**, *421*, 127822, DOI: 10.1016/j.cej.2020.127822.
- (123) Skurlov, I. D.; Sokolova, A. V.; Tatarinov, D. A.; Parfenov, P. S.; Kurshanov, D. A.; Ismagilov, A. O.; Koroleva, A. V.; Danilov, D. V.; Zhizhin, E. V.; Mikushev, S. V.; Tcypkin, A. N.; Fedorov, A. V.; Litvin, A. P. Engineering the Optical Properties of CsPbBr<sub>3</sub> Nanoplatelets through Cd<sup>2+</sup> Doping. *Materials* **2022**, *15* (21), 7676, DOI: 10.3390/ma15217676.
- (124) Skurlov, I. D.; Yin, W.; Ismagilov, A. O.; Tcypkin, A. N.; Hua, H.; Wang, H.; Zhang, X.; Litvin, A. P.; Zheng, W. Improved One- and Multiple-Photon Excited Photoluminescence from Cd<sup>2+</sup>-Doped CsPbBr<sub>3</sub> Perovskite NCs. *Nanomaterials* **2022**, *12* (1), 151, DOI: 10.3390/nano12010151.

- (125) Retuerto, M.; Yin, Z.; Emge, T. J.; Stephens, P. W.; Li, M.-R.; Sarkar, T.; Croft, M. C.; Ignatov, A.; Yuan, Z.; Zhang, S. J.; Jin, C.; Paria Sena, R.; Hadermann, J.; Kotliar, G.; Greenblatt, M. Hole Doping and Structural Transformation in CsTl<sub>1-x</sub>Hg<sub>x</sub>Cl<sub>3</sub>. *Inorganic Chemistry* **2015**, *54* (3), 1066-1075, DOI: 10.1021/ic502400d.
- (126) Lin, C.-Q.; Liu, M.-L.; Yang, Z.; Wang, H.; Pan, C.-Y. Mn<sup>2+</sup> doped CsPbBr<sub>3</sub> perovskite quantum dots with high quantum yield and stability for flexible array displays. *Journal of Solid State Chemistry* **2023**, *327*, 124295, DOI: 10.1016/j.jssc.2023.124295.
- (127) Yang, Z.; Yuan, X.; Song, Y.; Chen, M.; Xing, K.; Cao, S.; Zheng, J.; Zhao, J. Thickness-Dependent Photoluminescence Properties of Mn-Doped CsPbBr<sub>3</sub> Perovskite Nanoplatelets Synthesized at Room Temperature. *The Journal of Physical Chemistry C* **2023**, *127* (43), 21227-21234, DOI: 10.1021/acs.jpcc.3c05639.
- (128) Lockwood, D. J.; Coombs, G. J.; Cowley, R. A. Light scattering from the mixed antiferromagnet KNi<sub>x</sub>Mn<sub>1-x</sub>F<sub>3</sub>. *Journal of Physics C: Solid State Physics* **1979**, *12* (21), 4611, DOI: 10.1088/0022-3719/12/21/025.
- (129) Skrzypek, D. Critical Behaviour of the Magnetic Resonance in KNi<sub>x</sub>Mn<sub>1-x</sub>F<sub>3</sub>. *physica status solidi (b)* **1990**, *157* (2), 695-700, DOI: 10.1002/pssb.2221570222.
- (130) Skrzypek, D. Antiferromagnetic resonance in KNi<sub>x</sub>Mn<sub>1-x</sub>F<sub>3</sub> crystals. *Physica B: Condensed Matter* **1995**, *205* (3), 279-284, DOI: 10.1016/0921-4526(94)00611-X.
- (131) Harrison, A.; Visser, D.; Day, P.; Knop, W.; Steiner, M. Magnetic ordering effects in the random singlet-magnetic ground state system Rb<sub>(1-x)</sub>Cs<sub>x</sub>FeCl<sub>3</sub>. *Journal of Physics C: Solid State Physics* **1986**, *19* (34), 6811, DOI: 10.1088/0022-3719/19/34/018.
- (132) Ratuszna, A. The crystal structures of (K<sub>x</sub>Na<sub>1-x</sub>)MnF<sub>3</sub> perovskite-type compounds. *Phase Transitions* **1984**, *4* (3), 217-223, DOI: 10.1080/01411598408218596.
- (133) Ratuszna, A. Determination of structure distortions in KMnF<sub>3</sub> doped with Na<sup>+</sup>. *Zeitschrift fur Kristallographie* **1988**, *185*, 521.
- (134) Ratuszna, A.; Daniel, P.; Kapusta, J.; Rousseau, M. Experimental evidence for glasslike behavior in a KMnF<sub>3</sub>: Na<sup>+</sup> crystal from x-ray diffraction and Raman scattering. *Physical Review B* **1998**, *57* (17), 10470-10475, DOI: 10.1103/PhysRevB.57.10470.
- (135) Vehse, W. E.; Sherrill, F. A.; Riley, C. R. Lattice Constants for KMg<sub>(1-x)</sub>Mn<sub>x</sub>F<sub>3</sub> Crystals. *Journal of Applied Physics* **1972**, *43* (3), 1320-1321, DOI: 10.1063/1.1661275.
- (136) Elliott, N.; Pauling, L. The Crystal Structure of Cesium Aurous Auric Chloride, Cs<sub>2</sub>AuAuCl<sub>6</sub>, and Cesium Argentous Auric Chloride, Cs<sub>2</sub>AgAuCl<sub>6</sub>. *Journal of the American Chemical Society* **1938**, *60* (8), 1846-1851, DOI: 10.1021/ja01275a037.
- (137) Chartrand, P.; Pelton, A. D. Thermodynamic Evaluation and Optimization of the LiCl-NaCl-KCl-RbCl-CsCl-MgCl<sub>2</sub>-CaCl<sub>2</sub>-SrCl<sub>2</sub>-BaCl<sub>2</sub> System Using the Modified Quasichemical Model. *Canadian Metallurgical Quarterly* **2001**, *40* (1), 13-32, DOI: 10.1179/cmqr.2001.40.1.13.
- (138) Buzare, J. Y.; Foucher, P. Disorder and phase transitions in Rb<sub>1-x</sub>K<sub>x</sub>CaF<sub>3</sub>: an electron paramagnetic resonance investigation. *Journal of Physics: Condensed Matter* **1991**, *3* (15), 2535, DOI: 10.1088/0953-8984/3/15/009.
- (139) Flocken, J. W.; Smith, R. W.; Hardy, J. R.; Stevenson, E. S.; Swearingen, J. Phase transitions in mixed alkali calcium trifluoride solid solutions. *Materials Research Bulletin* **1996**, *31* (9), 1093-1099, DOI: 10.1016/0025-5408(96)00099-2.
- (140) Ratuszna, A.; Daniel, P.; Rousseau, M. Optical and X-ray evidence of structural phase transitions in mixed (Rb<sub>1-x</sub>K<sub>x</sub>)CaF<sub>3</sub> crystals. *Phase Transitions* **1995**, *54* (1), 43-59, DOI: 10.1080/01411599508200403.

- (141) Rousseau, M.; Daniel, P.; Toulouse, J.; Hennion, B. Evidence of disorder in the perovskite crystals  $\text{RbCaF}_3$  and  $\text{Rb}_{0.65}\text{K}_{0.35}\text{CaF}_3$  investigation of phonon acoustic modes by inelastic neutron scattering. *Physica B: Condensed Matter* **1997**, *234-236*, 139-141, DOI: 10.1016/S0921-4526(96)00928-3.
- (142) Shen, L.; Zhang, Z.; Zhao, Y.; Yang, H.; Yuan, L.; Chen, Y.; Xiang, W.; Liang, X. Synthesis and optical properties of novel mixed-metal cation  $\text{CsPb}_{1-x}\text{Ti}_x\text{Br}_3$ -based perovskite glasses for W-LED. *Journal of the American Ceramic Society* **2020**, *103* (1), 382-390, DOI: 10.1111/jace.16760.
- (143) Wu, Z.; Zhang, Q.; Li, B.; Shi, Z.; Xu, K.; Chen, Y.; Ning, Z.; Mi, Q. Stabilizing the  $\text{CsSnCl}_3$  Perovskite Lattice by B-Site Substitution for Enhanced Light Emission. *Chemistry of Materials* **2019**, *31* (14), 4999-5004, DOI: 10.1021/acs.chemmater.9b00433.
- (144) Inami, T.; Asano, T.; Ajiro, Y.; Goto, T. Magnetization process of the one-dimensional Ising-like antiferromagnet with nonmagnetic impurity,  $\text{CsCo}_{1-x}\text{Mg}_x\text{Cl}_3$ . *Physica B: Condensed Matter* **1994**, *201*, 204-207, DOI: 10.1016/0921-4526(94)91084-7.
- (145) Ohta, H.; Imagawa, S.; Motokawa, M.; Ikeda, H. Electron Paramagnetic Resonance of  $\text{CsCo}_x\text{Mg}_{1-x}\text{Cl}_3$  and the Determination of Exchange Interactions. *Journal of the Physical Society of Japan* **1993**, *62* (7), 2481-2489, DOI: 10.1143/JPSJ.62.2481.
- (146) Mei, E.; Chen, Y.; Chen, Y.; He, Q.; Tong, Y.; Yu, P.; Liang, X.; Xiang, W. Ba-doped  $\text{CsPbBr}_3$  with high quantum efficiency for wide color gamut on white light-emitting diodes. *Applied Physics Letters* **2021**, *119* (25), DOI: 10.1063/5.0070326.
- (147) Liu, H.; Wu, Z.; Shao, J.; Yao, D.; Gao, H.; Liu, Y.; Yu, W.; Zhang, H.; Yang, B.  $\text{CsPb}_x\text{Mn}_{1-x}\text{Cl}_3$  Perovskite Quantum Dots with High Mn Substitution Ratio. *ACS Nano* **2017**, *11* (2), 2239-2247, DOI: 10.1021/acsnano.6b08747.
- (148) Zhang, X.; Wang, F.; Wang, Y.; Wu, X.; Ou, Q.; Zhang, S. Boosting the Photoluminescence Quantum Yield and Stability of Lead-Free  $\text{CsEuCl}_3$  Nanocrystals via  $\text{Ni}^{2+}$  Doping. *The Journal of Physical Chemistry Letters* **2023**, *14* (24), 5580-5585, DOI: 10.1021/acs.jpcclett.3c01046.
- (149) Hu, Y.; Zhang, X.; Yang, C.; Li, J.; Wang, L.  $\text{Fe}^{2+}$  doped in  $\text{CsPbCl}_3$  perovskite nanocrystals: impact on the luminescence and magnetic properties. *RSC Advances* **2019**, *9* (57), 33017-33022, DOI: 10.1039/C9RA07069A.
- (150) Elbinger, G.; Funke, A.; Kleinert, P.; Rosemann, P.; Keilig, W. Präparation und Eigenschaften von Metallfluoridverbindungen des Typs  $\text{Me}^I\text{Me}^{II}\text{F}_3$ . *Zeitschrift für anorganische und allgemeine Chemie* **1972**, *393* (3), 193-206, DOI: 10.1002/zaac.19723930302.
- (151) Shi, W.; Zhang, X.; Chen, H. S.; Matras-Postolek, K.; Yang, P. Transition metal halide derived phase transition from  $\text{Cs}_4\text{PbCl}_6$  to  $\text{CsPb}_x\text{M}_{1-x}\text{X}_3$  for bright white light-emitting diodes. *Journal of Materials Chemistry C* **2021**, *9* (17), 5732-5739, DOI: 10.1039/D1TC01150B.
- (152) Rogge, R. B.; Yang, Y. S.; Tun, Z.; Gaulin, B. D.; Fernandez-Baca, J. A.; Nicklow, R. M.; Harrison, A. A neutron scattering study of the quasi-one-dimensional, dilute Ising-like antiferromagnet  $\text{CsCo}_{0.83}\text{Mg}_{0.17}\text{Br}_3$ . *Journal of Applied Physics* **1993**, *73* (10), 6451-6453, DOI: 10.1063/1.352630.
- (153) van Duijn, J.; Gaulin, B. D.; Lumsden, M. A.; Castellán, J. P.; Buyers, W. J. L. Random Fields and the Partially Paramagnetic State of  $\text{CsCo}_{0.83}\text{Mg}_{0.17}\text{Br}_3$ : Critical Scattering Study. *Physical Review Letters* **2004**, *92* (7), 077202, DOI: 10.1103/PhysRevLett.92.077202.
- (154) Yang, Y. S.; Marsiglio, F.; Madsen, M.; Gaulin, B. D.; Rogge, R. B.; Fernandez-Baca, J. A. Spin-wave response in the dilute quasi-one-dimensional Ising-like antiferromagnet

- CsCo<sub>0.83</sub>Mg<sub>0.17</sub>Br<sub>3</sub>. *Physical Review B* **2002**, *65* (21), 212408, DOI: 10.1103/PhysRevB.65.212408.
- (155) Yao, J.-S.; Ge, J.; Han, B.-N.; Wang, K.-H.; Yao, H.-B.; Yu, H.-L.; Li, J.-H.; Zhu, B.-S.; Song, J.-Z.; Chen, C.; Zhang, Q.; Zeng, H.-B.; Luo, Y.; Yu, S.-H. Ce<sup>3+</sup>-Doping to Modulate Photoluminescence Kinetics for Efficient CsPbBr<sub>3</sub> Nanocrystals Based Light-Emitting Diodes. *Journal of the American Chemical Society* **2018**, *140* (10), 3626-3634, DOI: 10.1021/jacs.7b11955.
- (156) Chen, R.; Xu, Y.; Wang, S.; Xia, C.; Liu, Y.; Yu, B.; Xuan, T.; Li, H. Zinc ions doped cesium lead bromide perovskite nanocrystals with enhanced efficiency and stability for white light-emitting diodes. *Journal of Alloys and Compounds* **2021**, *866*, 158969, DOI: 10.1016/j.jallcom.2021.158969.
- (157) Cui, K.; Wen, Y.; Han, X.; Hao, Z.; Zhang, J.; Xie, J. Intense blue emission from one-pot synthesized quaternary CsZn<sub>x</sub>Pb<sub>1-x</sub>Br<sub>3</sub> perovskite quantum dots. *Optical Materials* **2023**, *136*, 113441, DOI: 10.1016/j.optmat.2023.113441.
- (158) Tran, P.-N.; Phan, H.-H.; Luu, T.-N.; Tran, Q.-H.; Duong, T.-T. Optimizing the single-source flash thermal evaporation process of Zn-doped CsPbBr<sub>3</sub> films for enhanced performance in perovskite LEDs. *Applied Physics A* **2023**, *130* (1), 20, DOI: 10.1007/s00339-023-07179-8.
- (159) Shen, X.; Zhang, Y.; Kershaw, S. V.; Li, T.; Wang, C.; Zhang, X.; Wang, W.; Li, D.; Wang, Y.; Lu, M.; Zhang, L.; Sun, C.; Zhao, D.; Qin, G.; Bai, X.; Yu, W. W.; Rogach, A. L. Zn-Alloyed CsPbI<sub>3</sub> Nanocrystals for Highly Efficient Perovskite Light-Emitting Devices. *Nano Letters* **2019**, *19* (3), 1552-1559, DOI: 10.1021/acs.nanolett.8b04339.
- (160) Wu, Y.; Li, Q.; Chakoumakos, B. C.; Zhuravleva, M.; Lindsey, A. C.; Johnson II, J. A.; Stand, L.; Koschan, M.; Melcher, C. L. Quaternary Iodide K(Ca,Sr)I<sub>3</sub>:Eu<sup>2+</sup> Single-Crystal Scintillators for Radiation Detection: Crystal Structure, Electronic Structure, and Optical and Scintillation Properties. *Advanced Optical Materials* **2016**, *4* (10), 1518-1532, DOI: 10.1002/adom.201600239.
- (161) Wu, Y.; Zhuravleva, M.; Lindsey, A. C.; Koschan, M.; Melcher, C. L. Eu<sup>2+</sup> concentration effects in KCa<sub>0.8</sub>Sr<sub>0.2</sub>I<sub>3</sub>:Eu<sup>2+</sup>: A novel high-performance scintillator. *Nuclear Instruments and Methods in Physics Research Section A: Accelerators, Spectrometers, Detectors and Associated Equipment* **2016**, *820*, 132-140, DOI: 10.1016/j.nima.2016.03.027.
- (162) Kim, S.-Y.; Lee, H.-C.; Nam, Y.; Yun, Y.; Lee, S.-H.; Kim, D. H.; Noh, J. H.; Lee, J.-H.; Kim, D.-H.; Lee, S.; Heo, Y.-W. Ternary diagrams of the phase, optical bandgap energy and photoluminescence of mixed-halide perovskites. *Acta Materialia* **2019**, *181*, 460-469, DOI: 10.1016/j.actamat.2019.10.008.
- (163) Meng, F.; Liu, X.; Cai, X.; Gong, Z.; Li, B.; Xie, W.; Li, M.; Chen, D.; Yip, H.-L.; Su, S.-J. Incorporation of rubidium cations into blue perovskite quantum dot light-emitting diodes via FABr-modified multi-cation hot-injection method. *Nanoscale* **2019**, *11* (3), 1295-1303, DOI: 10.1039/C8NR07907B.
- (164) Otero-Martínez, C.; Imran, M.; Schrenker, N. J.; Ye, J.; Ji, K.; Rao, A.; Stranks, S. D.; Hoyer, R. L. Z.; Bals, S.; Manna, L.; Pérez-Juste, J.; Polavarapu, L. Fast A-Site Cation Cross-Exchange at Room Temperature: Single-to Double- and Triple-Cation Halide Perovskite Nanocrystals. *Angewandte Chemie International Edition* **2022**, *61* (34), e202205617, DOI: 10.1002/anie.202205617.
- (165) Gunasekaran, R. K.; Jung, J.; Yang, S. W.; Yun, J.; Yun, Y.; Vidyasagar, D.; Choi, W. C.; Lee, C.-L.; Noh, J. H.; Kim, D. H.; Lee, S. High-throughput compositional mapping of triple-

- cation tin–lead perovskites for high-efficiency solar cells. *InfoMat* **2023**, 5 (4), e12393, DOI: 10.1002/inf2.12393.
- (166) Saliba, M.; Matsui, T.; Seo, J.-Y.; Domanski, K.; Correa-Baena, J.-P.; Nazeeruddin, M. K.; Zakeeruddin, S. M.; Tress, W.; Abate, A.; Hagfeldt, A.; Grätzel, M. Cesium-containing triple cation perovskite solar cells: improved stability, reproducibility and high efficiency. *Energy & Environmental Science* **2016**, 9 (6), 1989-1997, DOI: 10.1039/C5EE03874J.
- (167) Palmstrom, A. F.; Eperon, G. E.; Leijtens, T.; Prasanna, R.; Habisreutinger, S. N.; Nemeth, W.; Gauld, E. A.; Dunfield, S. P.; Reese, M.; Nanayakkara, S.; Moot, T.; Werner, J.; Liu, J.; To, B.; Christensen, S. T.; McGehee, M. D.; van Hest, M. F. A. M.; Luther, J. M.; Berry, J. J.; Moore, D. T. Enabling Flexible All-Perovskite Tandem Solar Cells. *Joule* **2019**, 3 (9), 2193-2204, DOI: 10.1016/j.joule.2019.05.009.
- (168) Gao, L.; Zhang, Y.; Gou, L.; Wang, Q.; Wang, M.; Zheng, W.; Wang, Y.; Yip, H.-L.; Zhang, J. High efficiency pure blue perovskite quantum dot light-emitting diodes based on formamidinium manipulating carrier dynamics and electron state filling. *Light: Science & Applications* **2022**, 11 (1), 346, DOI: 10.1038/s41377-022-00992-5.
- (169) Nakamura, T.; Otsuka, K.; Hu, S.; Hashimoto, R.; Morishita, T.; Handa, T.; Yamada, T.; Truong, M. A.; Murdey, R.; Kanemitsu, Y.; Wakamiya, A. Composition–Property Mapping in Bromide-Containing Tin Perovskite Using High-Purity Starting Materials. *ACS Applied Energy Materials* **2022**, 5 (12), 14789-14798, DOI: 10.1021/acsaem.2c02144.
- (170) Jesper Jacobsson, T.; Correa-Baena, J.-P.; Pazoki, M.; Saliba, M.; Schenk, K.; Grätzel, M.; Hagfeldt, A. Exploration of the compositional space for mixed lead halogen perovskites for high efficiency solar cells. *Energy & Environmental Science* **2016**, 9 (5), 1706-1724, DOI: 10.1039/C6EE00030D.
- (171) Susic, I.; Kama, A.; Gil-Escrig, L.; Dreessen, C.; Palazon, F.; Cahen, D.; Sessolo, M.; Bolink, H. J. Combinatorial Vacuum-Deposition of Wide Bandgap Perovskite Films and Solar Cells. *Advanced Materials Interfaces* **2023**, 10 (4), 2202271, DOI: 10.1002/admi.202202271.
- (172) Xiao, H.; Xiong, H.; Li, P.; Jiang, L.; Yang, A.; Lin, L.; Kang, Z.; Yan, Q.; Qiu, Y. Tunable deep-blue luminescence from ball-milled chlorine-rich  $\text{Cs}_x(\text{NH}_4)_{1-x}\text{PbCl}_2\text{Br}$  nanocrystals by ammonium modulation. *Chemical Communications* **2022**, 58 (23), 3827-3830, DOI: 10.1039/D1CC07125D.
- (173) Wang, C.; Liu, Y.; Feng, X.; Zhou, C.; Liu, Y.; Yu, X.; Zhao, G. Phase Regulation Strategy of Perovskite Nanocrystals from 1D Orthomorphous  $\text{NH}_4\text{PbI}_3$  to 3D Cubic  $(\text{NH}_4)_{0.5}\text{Cs}_{0.5}\text{Pb}(\text{I}_{0.5}\text{Br}_{0.5})_3$  Phase Enhances Photoluminescence. *Angewandte Chemie International Edition* **2019**, 58 (34), 11642-11646, DOI: 10.1002/anie.201903121.
- (174) Terada, S.; Oku, T.; Suzuki, A.; Okita, M.; Fukunishi, S.; Tachikawa, T.; Hasegawa, T. Ethylammonium Bromide- and Potassium-Added  $\text{CH}_3\text{NH}_3\text{PbI}_3$  Perovskite Solar Cells. *Photonics* **2022**, 9 (11), 791, DOI: 10.3390/photonics9110791.
- (175) Sanchez, S. L.; Foadian, E.; Ziatdinov, M.; Yang, J.; Kalinin, S. V.; Liu, Y.; Ahmadi, M. Physics-driven discovery and bandgap engineering of hybrid perovskites. *arXiv* **2023**, 2310.06583, DOI: 10.48550/arXiv.2310.06583.
- (176) Gabriel Tomulescu, A.; Nicoleta Leonat, L.; Neațu, F.; Stancu, V.; Toma, V.; Derbali, S.; Neațu, Ș.; Mihai Rostas, A.; Beșleagă, C.; Pătru, R.; Pintilie, I.; Florea, M. Enhancing stability of hybrid perovskite solar cells by imidazolium incorporation. *Solar Energy Materials and Solar Cells* **2021**, 227, 111096, DOI: 10.1016/j.solmat.2021.111096.
- (177) Singh, R. K.; Sharma, P.; Lu, C.-H.; Kumar, R.; Jain, N.; Singh, J. Structural, morphological and thermodynamic parameters investigation of tunable  $\text{MAPb}_{1-x}\text{Cd}_x\text{Br}_{3-2x}\text{I}_{2x}$

hybrid perovskite. *Journal of Alloys and Compounds* **2021**, *866*, 158936, DOI: 10.1016/j.jallcom.2021.158936.

(178) Singh, R. K.; Sharma, P.; Kumar, R.; Som, S.; Dutta, S.; Jain, N.; Chaurasiya, R.; Meena, M. L.; Ho, J.-S.; Dai, S.-W.; Singh, J.; Lu, C.-H.; Lin, H.-W. CH<sub>3</sub>NH<sub>3</sub>Pb<sub>1-x</sub>Co<sub>x</sub>Br<sub>3-2x</sub>Cl<sub>2x</sub> Perovskite Quantum Dots for Wide-Color Backlighting. *ACS Applied Nano Materials* **2021**, *4* (1), 717-728, DOI: 10.1021/acsanm.0c03019.

(179) Xun, J.; Deng, J.; Shen, W.; Li, M.; He, R. Highly efficient green-emitting nanocrystals of MAPb<sub>1-x</sub>Mn<sub>x</sub>Br<sub>3</sub> perovskite with excellent thermal stability. *Optical Materials* **2021**, *122*, 111799, DOI: 10.1016/j.optmat.2021.111799.

(180) Lu, C.; Zhou, J.; Tang, C.; Dai, Q.; Peng, Y.; Lv, W.; Sun, L.; Xu, S.; Hu, W. Ultranarrow-band filterless photodetectors based on CH<sub>3</sub>NH<sub>3</sub>PbCl<sub>x</sub>Br<sub>3-x</sub> mixed-halide perovskite single crystals. *Nanotechnology* **2023**, *34* (34), 345705, DOI: 10.1088/1361-6528/acd944.

(181) Mazurin, M.; Shelestova, A.; Tsvetkov, D.; Sereda, V.; Ivanov, I.; Malyshkin, D.; Zuev, A. Thermochemical Study of CH<sub>3</sub>NH<sub>3</sub>Pb(Cl<sub>1-x</sub>Br<sub>x</sub>)<sub>3</sub> Solid Solutions. *Materials* **2022**, *15* (21), 7675, DOI: 10.3390/ma15217675.

(182) Pan, Y.; Wang, X.; Xu, Y.; Chai, S.; Wu, J.; Zhao, Z.; Li, Q.; Wu, J.; Chen, J.; Zhu, Z.; Bae, B. S.; Fayemi, O. E.; Zhou, J.; Zhu, Y.; Lei, W. Epitaxy growth of MAPbBr<sub>x</sub>Cl<sub>3-x</sub> single-crystalline perovskite films toward spectral selective detection in both broadband and narrowband ranges. *Journal of Materials Chemistry C* **2023**, *11* (40), 13763-13773, DOI: 10.1039/D3TC02300A.

(183) Rajagopal, A.; Stoddard, R. J.; Hillhouse, H. W.; Jen, A. K. Y. On understanding bandgap bowing and optoelectronic quality in Pb–Sn alloy hybrid perovskites. *Journal of Materials Chemistry A* **2019**, *7* (27), 16285-16293, DOI: 10.1039/C9TA05308E.

(184) Liang, F.-X.; Zhou, L.-L.; Hu, Y.; Li, S.-F.; Zhang, Z.-Y.; Li, J.-Y.; Fu, C.; Wu, C.-Y.; Wang, L.; Huang, J.-A.; Luo, L.-B. Self-Driven Narrow-Band Photodetector based on FAPbBr<sub>2.5</sub>I<sub>0.5</sub> Single Crystal for Yellow Light Intensity Meter Application. *Advanced Functional Materials* **2023**, *33* (36), 2302175, DOI: 10.1002/adfm.202302175.

(185) Noh, J. H.; Im, S. H.; Heo, J. H.; Mandal, T. N.; Seok, S. I. Chemical Management for Colorful, Efficient, and Stable Inorganic–Organic Hybrid Nanostructured Solar Cells. *Nano Letters* **2013**, *13* (4), 1764-1769, DOI: 10.1021/nl400349b.

(186) Hu, S.; Otsuka, K.; Murdey, R.; Nakamura, T.; Truong, M. A.; Yamada, T.; Handa, T.; Matsuda, K.; Nakano, K.; Sato, A.; Marumoto, K.; Tajima, K.; Kanemitsu, Y.; Wakamiya, A. Optimized carrier extraction at interfaces for 23.6% efficient tin–lead perovskite solar cells. *Energy & Environmental Science* **2022**, *15* (5), 2096-2107, DOI: 10.1039/D2EE00288D.

(187) Turren-Cruz, S.-H.; Pascual, J.; Hu, S.; Sanchez-Diaz, J.; Galve-Lahoz, S.; Liu, W.; Hempel, W.; Chirvony, V. S.; Martinez-Pastor, J. P.; Boix, P. P.; Wakamiya, A.; Mora-Seró, I. Multicomponent Approach for Stable Methylammonium-Free Tin–Lead Perovskite Solar Cells. *ACS Energy Letters* **2024**, *9* (2), 432-441, DOI: 10.1021/acsenergylett.3c02426.

(188) Zhang, H.; Bi, Z.; Zhai, Z.; Gao, H.; Liu, Y.; Jin, M.; Ye, M.; Li, X.; Liu, H.; Zhang, Y.; Li, X.; Tan, H.; Xu, Y.; Yang, L. Revealing Unusual Bandgap Shifts with Temperature and Bandgap Renormalization Effect in Phase-Stabilized Metal Halide Perovskite Thin Films. *Advanced Functional Materials* **2024**, *34* (9), 2302214, DOI: 10.1002/adfm.202302214.

(189) Prasanna, R.; Gold-Parker, A.; Leijtens, T.; Conings, B.; Babayigit, A.; Boyen, H.-G.; Toney, M. F.; McGehee, M. D. Band Gap Tuning via Lattice Contraction and Octahedral Tilting in Perovskite Materials for Photovoltaics. *Journal of the American Chemical Society* **2017**, *139* (32), 11117-11124, DOI: 10.1021/jacs.7b04981.

- (190) Wang, J.; Uddin, M. A.; Chen, B.; Ying, X.; Ni, Z.; Zhou, Y.; Li, M.; Wang, M.; Yu, Z.; Huang, J. Enhancing Photostability of Sn-Pb Perovskite Solar Cells by an Alkylammonium Pseudo-Halogen Additive. *Advanced Energy Materials* **2023**, *13* (15), 2204115, DOI: 10.1002/aenm.202204115.
- (191) Guo, J.; Fu, Y.; Zheng, W.; Xie, M.; Huang, Y.; Miao, Z.; Han, C.; Yin, W.; Zhang, J.; Yang, X.; Tian, J.; Zhang, X. Entropy-Driven Strongly Confined Low-Toxicity Pure-Red Perovskite Quantum Dots for Spectrally Stable Light-Emitting Diodes. *Nano Letters* **2024**, *24* (1), 417-423, DOI: 10.1021/acs.nanolett.3c04214.
- (192) Hsiao, K.-C.; Ho, C.-M.; Lin, T.-H.; Chen, S.-H.; Chang, Y.-H.; Liao, Y.-H.; Chang, J.-M.; Lin, T.-F.; Huang, Y.-C.; Lee, K.-M.; Wu, M.-C. Ceiling of Barium Substitution for B-Site Cation in Organometal Halide Perovskite Solar Cells. *International Journal of Energy Research* **2024**, *2024*, 9990559, DOI: 10.1155/2024/9990559.
- (193) Saliba, M.; Matsui, T.; Domanski, K.; Seo, J.-Y.; Ummadisingu, A.; Zakeeruddin, S. M.; Correa-Baena, J.-P.; Tress, W. R.; Abate, A.; Hagfeldt, A.; Grätzel, M. Incorporation of rubidium cations into perovskite solar cells improves photovoltaic performance. *Science* **2016**, *354* (6309), 206-209, DOI: 10.1126/science.aah5557.
- (194) Susic, I.; Gil-Escrig, L.; Zanoni, K. P. S.; Roldán-Carmona, C.; Sessolo, M.; Bolink, H. J. Pure Iodide Multication Wide Bandgap Perovskites by Vacuum Deposition. *ACS Materials Letters* **2023**, *5* (12), 3299-3305, DOI: 10.1021/acsmaterialslett.3c01094.
- (195) Derbali, S.; Nouneh, K.; Florea, M.; Leonat, L. N.; Stancu, V.; Tomulescu, A. G.; Galca, A. C.; Secu, M.; Pintilie, L.; Touhami, M. E. Potassium-containing triple-cation mixed-halide perovskite materials: Toward efficient and stable solar cells. *Journal of Alloys and Compounds* **2021**, *858*, 158335, DOI: 10.1016/j.jallcom.2020.158335.
- (196) Ono, I.; Oku, T.; Suzuki, A.; Fukunishi, S.; Tachikawa, T.; Hasegawa, T. Effects of ethylammonium and rubidium addition to guanidinium-based  $\text{CH}_3\text{NH}_3\text{PbI}_3$  perovskite photovoltaic devices prepared at 190 °C in ambient air. *Materials Today Communications* **2024**, *38*, 107623, DOI: 10.1016/j.mtcomm.2023.107623.
- (197) Minussi, F. B.; A. Silva, L.; Araújo, E. B. Structure, optoelectronic properties and thermal stability of the triple organic cation  $\text{GA}_x\text{FA}_x\text{MA}_{1-2x}\text{PbI}_3$  system prepared by mechanochemical synthesis. *Physical Chemistry Chemical Physics* **2022**, *24* (8), 4715-4728, DOI: 10.1039/D1CP04977A.
- (198) Minussi, F. B.; Silva Jr., R. M.; Araújo, E. B. Composition-Property Relations for  $\text{GA}_x\text{FA}_y\text{MA}_{1-x-y}\text{PbI}_3$  Perovskites. *Small* **2024**, *20* (7), 2305054, DOI: 10.1002/smll.202305054.
- (199) Wang, S.; Pang, S.; Chen, D.; Zhu, W.; Xi, H.; Zhang, C. Improving perovskite solar cell performance by compositional engineering via triple-mixed cations. *Solar Energy* **2021**, *220*, 412-417, DOI: 10.1016/j.solener.2021.03.036.
- (200) Badrooj, M.; Jamali-Sheini, F.; Torabi, N. Zn-doped Pb/Sn hybrid perovskite solar cells: Towards high photovoltaic performance. *Solar Energy* **2022**, *236*, 63-74, DOI: 10.1016/j.solener.2022.02.034.
- (201) Soto-Montero, T.; Kralj, S.; Soltanpoor, W.; Solomon, J. S.; Gómez, J. S.; Zanoni, K. P. S.; Paliwal, A.; Bolink, H. J.; Baeumer, C.; Kentgens, A. P. M.; Morales-Masis, M. Single-Source Vapor-Deposition of  $\text{MA}_{1-x}\text{FA}_x\text{PbI}_3$  Perovskite Absorbers for Solar Cells. *Advanced Functional Materials* **2023**, *n/a* (n/a), 2300588, DOI: 10.1002/adfm.202300588.
- (202) Weber, O. J.; Charles, B.; Weller, M. T. Phase behaviour and composition in the formamidinium–methylammonium hybrid lead iodide perovskite solid solution. *Journal of Materials Chemistry A* **2016**, *4* (40), 15375-15382, DOI: 10.1039/C6TA06607K.

- (203) Zhao, C.; Cazorla, C.; Zhang, X.; Huang, H.; Zhao, X.; Li, D.; Shi, J.; Zhao, Q.; Ma, W.; Yuan, J. Fast Organic Cation Exchange in Colloidal Perovskite Quantum Dots toward Functional Optoelectronic Applications. *Journal of the American Chemical Society* **2024**, *146* (7), 4913-4921, DOI: 10.1021/jacs.3c14000.
- (204) Ju, D.; Dang, Y.; Zhu, Z.; Liu, H.; Chueh, C.-C.; Li, X.; Wang, L.; Hu, X.; Jen, A. K. Y.; Tao, X. Tunable Band Gap and Long Carrier Recombination Lifetime of Stable Mixed  $\text{CH}_3\text{NH}_3\text{Pb}_x\text{Sn}_{1-x}\text{Br}_3$  Single Crystals. *Chemistry of Materials* **2018**, *30* (5), 1556-1565, DOI: 10.1021/acs.chemmater.7b04565.
- (205) Kahmann, S.; Chen, Z.; Hordiichuk, O.; Nazarenko, O.; Shao, S.; Kovalenko, M. V.; Blake, G. R.; Tao, S.; Loi, M. A. Compositional Variation in  $\text{FAPb}_{1-x}\text{Sn}_x\text{I}_3$  and Its Impact on the Electronic Structure: A Combined Density Functional Theory and Experimental Study. *ACS Applied Materials & Interfaces* **2022**, *14* (30), 34253-34261, DOI: 10.1021/acsami.2c00889.
- (206) Lü, X.; Stoumpos, C.; Hu, Q.; Ma, X.; Zhang, D.; Guo, S.; Hoffman, J.; Bu, K.; Guo, X.; Wang, Y.; Ji, C.; Chen, H.; Xu, H.; Jia, Q.; Yang, W.; Kanatzidis, M. G.; Mao, H.-K. Regulating off-centering distortion maximizes photoluminescence in halide perovskites. *National Science Review* **2020**, *8* (9), DOI: 10.1093/nsr/nwaa288.
- (207) Dintakurti, S. S. H.; Walker, D.; Bird, T. A.; Fang, Y.; White, T.; Hanna, J. V. A powder XRD, solid state NMR and calorimetric study of the phase evolution in mechanochemically synthesized dual cation  $(\text{Cs}_x(\text{CH}_3\text{NH}_3)_{1-x})\text{PbX}_3$  lead halide perovskite systems. *Physical Chemistry Chemical Physics* **2022**, *24* (30), 18004-18021, DOI: 10.1039/D2CP02131E.
- (208) Chen, M.; Dong, Q.; Xiao, C.; Zheng, X.; Dai, Z.; Shi, Y.; Luther, J. M.; Padture, N. P. Lead-Free Flexible Perovskite Solar Cells with Interfacial Native Oxide Have >10% Efficiency and Simultaneously Enhanced Stability and Reliability. *ACS Energy Letters* **2022**, *7* (7), 2256-2264, DOI: 10.1021/acsenergylett.2c01130.
- (209) Hao, F.; Stoumpos, C. C.; Chang, R. P. H.; Kanatzidis, M. G. Anomalous Band Gap Behavior in Mixed Sn and Pb Perovskites Enables Broadening of Absorption Spectrum in Solar Cells. *Journal of the American Chemical Society* **2014**, *136* (22), 8094-8099, DOI: 10.1021/ja5033259.
- (210) Im, J.; Stoumpos, C. C.; Jin, H.; Freeman, A. J.; Kanatzidis, M. G. Antagonism between Spin-Orbit Coupling and Steric Effects Causes Anomalous Band Gap Evolution in the Perovskite Photovoltaic Materials  $\text{CH}_3\text{NH}_3\text{Sn}_{1-x}\text{Pb}_x\text{I}_3$ . *The Journal of Physical Chemistry Letters* **2015**, *6* (17), 3503-3509, DOI: 10.1021/acs.jpcclett.5b01738.
- (211) Chu, Y.; Wang, C.; Ma, L.; Feng, X.; Wang, B.; Wu, Y.; Jia, Y.; Zhang, M.; Sun, Y.; Zhang, H.; Zhao, G. Unveiling the photoluminescence regulation of colloidal perovskite quantum dots via defect passivation and lattice distortion by potassium cations doping: Not the more the better. *Journal of Colloid and Interface Science* **2021**, *596*, 199-205, DOI: 10.1016/j.jcis.2021.03.128.
- (212) Ali, A.; Park, H.; Mall, R.; Aïssa, B.; Sanvito, S.; Bensmail, H.; Belaidi, A.; El-Mellouhi, F. Machine Learning Accelerated Recovery of the Cubic Structure in Mixed-Cation Perovskite Thin Films. *Chemistry of Materials* **2020**, *32* (7), 2998-3006, DOI: 10.1021/acs.chemmater.9b05342.
- (213) Jia, D.; Chen, J.; Zhuang, R.; Hua, Y.; Zhang, X. Antisolvent-Assisted In Situ Cation Exchange of Perovskite Quantum Dots for Efficient Solar Cells. *Advanced Materials* **2023**, *35* (21), 2212160, DOI: 10.1002/adma.202212160.
- (214) Liang, F.-C.; Jhuang, F.-C.; Fang, Y.-H.; Benas, J.-S.; Chen, W.-C.; Yan, Z.-L.; Lin, W.-C.; Su, C.-J.; Sato, Y.; Chiba, T.; Kido, J.; Kuo, C.-C. Synergistic Effect of Cation Composition



- Engineering of Hybrid Cs<sub>1-x</sub>FA<sub>x</sub>PbBr<sub>3</sub> Nanocrystals for Self-Healing Electronics Application. *Advanced Materials* **2023**, *35* (9), 2207617, DOI: 10.1002/adma.202207617.
- (215) Pisanu, A. Chemical tuning of hybrid perovskites for solar-driven clean energy technologies. Ph.D. Università di Pavia, 2020.
- (216) Nagane, S.; Ghosh, D.; Hoyer, R. L. Z.; Zhao, B.; Ahmad, S.; Walker, A. B.; Islam, M. S.; Ogale, S.; Sadhanala, A. Lead-Free Perovskite Semiconductors Based on Germanium–Tin Solid Solutions: Structural and Optoelectronic Properties. *The Journal of Physical Chemistry C* **2018**, *122* (11), 5940-5947, DOI: 10.1021/acs.jpcc.8b00480.
- (217) Liu, Y.; Gong, Y.-P.; Geng, S.; Feng, M.-L.; Manidaki, D.; Deng, Z.; Stoumpos, C. C.; Canepa, P.; Xiao, Z.; Zhang, W.-X.; Mao, L. Hybrid Germanium Bromide Perovskites with Tunable Second Harmonic Generation. *Angewandte Chemie International Edition* **2022**, *61* (43), e202208875, DOI: 10.1002/anie.202208875.
- (218) Liu, J.; Fu, H.; Du, Z.; Ou, D.; Li, S.; Chen, Q.; Yang, W.; Zhao, J.; Zheng, J. Enhanced photothermal stability of in situ grown FAPbBr<sub>3</sub> nanocrystals in polyvinylidene fluoride by incorporation of Cd<sup>2+</sup> ions. *Journal of Materials Chemistry C* **2022**, *10* (46), 17512-17520, DOI: 10.1039/D2TC04100F.
- (219) Oku, T.; Uchiya, S.; Okumura, R.; Suzuki, A.; Ono, I.; Fukunishi, S.; Tachikawa, T.; Hasegawa, T. Effects of Co-Addition of Guanidinium and Cesium to CH<sub>3</sub>NH<sub>3</sub>PbI<sub>3</sub> Perovskite Solar Cells. *Inorganics* **2023**, *11* (7), 273, DOI: 10.3390/inorganics11070273.
- (220) Deng, J.; Xun, J.; Qin, Y.; Li, M.; He, R. Blue-emitting NH<sub>4</sub><sup>+</sup>-doped MAPbBr<sub>3</sub> perovskite quantum dots with near unity quantum yield and super stability. *Chemical Communications* **2020**, *56* (79), 11863-11866, DOI: 10.1039/D0CC04912C.
- (221) Lu, C.-H.; Singh, R. K.; Chen, T.-Y.; Som, S.; Kumar, R.; Lu, S. A.; Meena, M. L. Rapid synthesis and theoretical analysis of CH<sub>3</sub>NH<sub>3</sub>Pb<sub>1-x</sub>Cd<sub>x</sub>Br<sub>3</sub> perovskite quantum dots for backlight LEDs: A step towards enhanced stability. *Organic Electronics* **2022**, *102*, 106444, DOI: 10.1016/j.orgel.2022.106444.
- (222) Klug, M. T.; Osherov, A.; Haghghirad, A. A.; Stranks, S. D.; Brown, P. R.; Bai, S.; Wang, J. T. W.; Dang, X.; Bulović, V.; Snaith, H. J.; Belcher, A. M. Tailoring metal halide perovskites through metal substitution: influence on photovoltaic and material properties. *Energy & Environmental Science* **2017**, *10* (1), 236-246, DOI: 10.1039/C6EE03201J.
- (223) Yu, J.; Xu, H.; Wu, L.; Han, Q.; Wu, W. Highly sensitive photodetector of Zn/Bi doped MAPbBr<sub>3</sub> single crystals formed homojunction. *Materials Science in Semiconductor Processing* **2022**, *149*, 106824, DOI: 10.1016/j.mssp.2022.106824.
- (224) Zhou, Z.; Xu, J.; Liu, Y.; Wei, C.; Zhang, H.; Wang, Q. Zn-alloyed MAPbBr<sub>3</sub> crystals with improved thermoelectric and photocatalytic properties. *Materials Chemistry Frontiers* **2021**, *5* (24), 8319-8332, DOI: 10.1039/D1QM00993A.
- (225) Abd El-Samad, A. E.; Gad, N.; El-Aasser, M.; Rashad, M. M.; Mourtada Elseman, A. Optoelectronic investigation and simulation study of zinc and cobalt doped lead halide perovskite nanocrystals. *Solar Energy* **2022**, *247*, 553-563, DOI: 10.1016/j.solener.2022.10.061.
- (226) Roscoe, S. L.; Haendler, H. M. Synthesis of fluorometallates in methanol. The solid solution NH<sub>4</sub>MnF<sub>3</sub> – NH<sub>4</sub>ZnF<sub>3</sub>. *Inorganica Chimica Acta* **1967**, *1*, 73-75, DOI: 10.1016/S0020-1693(00)93142-6.
- (227) Xu, Q.; Li, Z.; Liu, M.; Yin, W.-J. Rationalizing Perovskite Data for Machine Learning and Materials Design. *The Journal of Physical Chemistry Letters* **2018**, *9* (24), 6948-6954, DOI: 10.1021/acs.jpcclett.8b03232.

- (228) Muñoz, I. C.; Cruz-Zaragoza, E.; Favalli, A.; Furetta, C. Thermoluminescence property of  $\text{LiMgF}_3$  erbium activated phosphor. *Applied Radiation and Isotopes* **2012**, *70* (5), 893-896, DOI: 10.1016/j.apradiso.2012.02.006.
- (229) Grebenshchikov, R. G. In *Исследование диаграммы состояния системы  $\text{RbF}-\text{BeF}_2$  и ее отношение к системе  $\text{BaO}-\text{SiO}_2$* , Proceedings of the Academy of Sciences, Institute of Silicate Chemistry of the USSR Academy of Sciences: 1957; pp 316-319.
- (230) Sandeep; Rai, D. P.; Shankar, A.; Ghimire, M. P.; Khenata, R.; Bin Omran, S.; Syrotyuk, S. V.; Thapa, R. K. Investigation of the structural, electronic and optical properties of the cubic  $\text{RbMF}_3$  perovskites (M = Be, Mg, Ca, Sr and Ba) using modified Becke-Johnson exchange potential. *Materials Chemistry and Physics* **2017**, *192*, 282-290, DOI: 10.1016/j.matchemphys.2017.02.005.
- (231) Levina, M. E.; Yunakovskaya, E. V. Phase transitions of the metafluoroberyllates  $\text{RbBeF}_3$  and  $\text{CsBeF}_3$ . *Moscow University Chemistry Bulletin* **1971**, *26* (6), 40-42.
- (232) Li, C.; Lu, X.; Ding, W.; Feng, L.; Gao, Y.; Guo, Z. Formability of  $\text{ABX}_3$  (X = F, Cl, Br, I) halide perovskites. *Acta Crystallographica Section B* **2008**, *64* (6), 702-707, DOI: 10.1107/S0108768108032734.
- (233) Martin, C. D.; Chaudhuri, S.; Grey, C. P.; Parise, J. B. Effect of A-site cation radius on ordering of  $\text{BX}_6$  octahedra in  $(\text{K,Na})\text{MgF}_3$  perovskite. *American Mineralogist* **2005**, *90* (10), 1522-1533, DOI: 10.2138/am.2005.1693.
- (234) Carter, F. L. On the existence of two forms of  $\text{NaNiF}_3$ . *Solid State Communications* **1969**, *7* (14), 993-995, DOI: 10.1016/0038-1098(69)90070-2.
- (235) Hoppe, R.; Dähne, W.; Klemm, W. Mangantetrafluorid mit einem Anhang über  $\text{LiMnF}_5$  und  $\text{LiMnF}_4$ . *Justus Liebigs Annalen der Chemie* **1962**, *658* (1), 1-5, DOI: 10.1002/jlac.19626580102.
- (236) Gonzalo, E. C.; Sanjuán, M. L.; Hoelzel, M.; Azcondo, M. T.; Amador, U.; Sobrados, I.; Sanz, J.; García-Alvarado, F.; Kuhn, A. Synthesis and Characterization of  $\text{NaNiF}_3 \cdot 3\text{H}_2\text{O}$ : An Unusual Ordered Variant of the  $\text{ReO}_3$  Type. *Inorganic Chemistry* **2015**, *54* (7), 3172-3182, DOI: 10.1021/ic5026262.
- (237) Kaiser, V.; Otto, M.; Binder, F.; Babel, D. Jahn-Teller-Effekt und Kristallstruktur-Verzerrung bei den Kupfer-Fluorperowskiten  $\text{NaCuF}_3$  und  $\text{RbCuF}_3$ . *Zeitschrift für anorganische und allgemeine Chemie* **1990**, *585* (1), 93-104, DOI: 10.1002/zaac.19905850112.
- (238) Yakovlev, S.; Avdeev, M.; Mezouar, M. High-pressure structural behavior and equation of state of  $\text{NaZnF}_3$ . *Journal of Solid State Chemistry* **2009**, *182* (6), 1545-1549, DOI: 10.1016/j.jssc.2009.03.031.
- (239) Portier, J.; Tressaud, A.; Dupin, J. Les Pérovskites Fluorées  $\text{AgMeF}_3$  (Me= Mg, Mn; Co; Ni; Cu; Zn). *Cr. Acad. Sci. C* **1970**, *270*, 216-218.
- (240) Tressaud, A.; De Pape, R.; Portier, J.; Hagenmuller, P. Les systemes  $\text{MF}-\text{FeF}_2$  (M= Li, Na, Rb, Tl). *Comptes Rendus des Seances de l'Academie des Sciences, Serie C: Sciences Chimiques* **1968**, *266*, 984-986.
- (241) Bernal, F. L. M.; Sottmann, J.; Wragg, D. S.; Fjellvåg, H.; Fjellvåg, Ø. S.; Drathen, C.; Sławiński, W. A.; Løvvik, O. M. Structural and magnetic characterization of the elusive Jahn-Teller active  $\text{NaCrF}_3$ . *Physical Review Materials* **2020**, *4* (5), 054412, DOI: 10.1103/PhysRevMaterials.4.054412.
- (242) Tong, J.; Lee, C.; Whangbo, M. H.; Kremer, R. K.; Simon, A.; Köhler, J. Cooperative Jahn-Teller distortion leading to the spin-1/2 uniform antiferromagnetic chains in triclinic

- perovskites AgCuF<sub>3</sub> and NaCuF<sub>3</sub>. *Solid State Sciences* **2010**, *12* (5), 680-684, DOI: 10.1016/j.solidstatesciences.2009.02.028.
- (243) Shafer, M. W. The synthesis and characterization of vanadium difluoride, NaVF<sub>3</sub>, KVF<sub>3</sub>, and RbVF<sub>3</sub>. *Materials Research Bulletin* **1969**, *4* (12), 905-912, DOI: 10.1016/0025-5408(69)90047-6.
- (244) Bukhalova, G. A.; Berezhnaya, V. T.; Okol'chishena, N. E. Some properties of compounds of the type M<sup>1+</sup>M<sup>2+</sup>F<sub>3</sub>. *Russian Journal of Inorganic Chemistry* **1969**, *14*, 917-921.
- (245) Katrusiak, A.; Ratuszna, A. Phase transitions and the structure of NaMnF<sub>3</sub> perovskite crystals as a function of temperature and pressure. *Solid State Communications* **1992**, *84* (4), 435-441, DOI: 10.1016/0038-1098(92)90492-R.
- (246) Okazaki, A.; Suemune, Y.; Fuchikami, T. The Crystal Structures of KMnF<sub>3</sub>, KFeF<sub>3</sub>, KCoF<sub>3</sub>, KNiF<sub>3</sub> and KCuF<sub>3</sub>. *Journal of the Physical Society of Japan* **1959**, *14* (12), 1823-1824, DOI: 10.1143/JPSJ.14.1823.
- (247) Sintani, K.; Tomono, Y.; Tsuchida, A.; Siratori, K. Influence of Magnetic Ordering on the Lattice Vibration of KNiF<sub>3</sub>. *Journal of the Physical Society of Japan* **1968**, *25* (1), 99-108, DOI: 10.1143/JPSJ.25.99.
- (248) DeVries, R. C.; Roy, R. Fluoride Models for Oxide Systems of Dielectric Interest. The Systems KF—MgF<sub>2</sub> and AgF—ZnF<sub>2</sub>. *Journal of the American Chemical Society* **1953**, *75* (10), 2479-2484, DOI: 10.1021/ja01106a059.
- (249) Racine, S.; Cipriani, J.; Pontikis, C. Diffusion de la lumiere et excitations magnetiques dans l'antiferromagnetique KCoF<sub>3</sub>. *Comptes Rendus des Seances de l'Academie des Sciences, Serie B: Sciences Physiques* **1972**, *274*, 16-18.
- (250) Szlag, R. G.; Suescun, L.; Dhanapala, B. D.; Rabuffetti, F. A. Rubidium—Alkaline-Earth Trifluoroacetate Hybrids as Self-Fluorinating Single-Source Precursors to Mixed-Metal Fluorides. *Inorganic Chemistry* **2019**, *58* (5), 3041-3049, DOI: 10.1021/acs.inorgchem.8b02988.
- (251) Lukina, M. M.; Klientova, G. P. Hydrothermal synthesis of KZnF<sub>3</sub> single crystals with a perovskite structure. *Soviet Physics Crystallography (translated from Kristallografiya)* **1969**, *14* (2), 314-315.
- (252) Rüdorff, W.; Lincke, G.; Babel, D. Untersuchungen an ternären Fluoriden. (II). Kobalt(II)- und Kupfer(II)-fluoride. *Zeitschrift für anorganische und allgemeine Chemie* **1963**, *320* (1-4), 150-170, DOI: 10.1002/zaac.19633200119.
- (253) Lu, S.; Zhou, Q.; Ma, L.; Guo, Y.; Wang, J. Rapid Discovery of Ferroelectric Photovoltaic Perovskites and Material Descriptors via Machine Learning. *Small Methods* **2019**, *3* (11), 1900360, DOI: 10.1002/smt.201900360.
- (254) Syono, Y.; Akimoto, S.-i.; Kohn, K. Structure Relations of Hexagonal Perovskite-Like Compounds ABX<sub>3</sub> at High Pressure. *Journal of the Physical Society of Japan* **1969**, *26* (4), 993-999, DOI: 10.1143/JPSJ.26.993.
- (255) Arakawa, M.; Ebisu, H.; Takeuchi, H. EPR study of Cr<sup>3+</sup> centres in Tl<sub>2</sub>MgF<sub>4</sub> and Tl<sub>2</sub>ZnF<sub>4</sub> crystals. In *EPR in the 21st Century*; Kawamori, A.; Yamauchi, J.; Ohta, H., Eds.; Elsevier Science B.V.: Amsterdam, 2002; pp 219-224.
- (256) van Roekeghem, A.; Carrete, J.; Oses, C.; Curtarolo, S.; Mingo, N. High-Throughput Computation of Thermal Conductivity of High-Temperature Solid Phases: The Case of Oxide and Fluoride Perovskites. *Physical Review X* **2016**, *6* (4), 041061, DOI: 10.1103/PhysRevX.6.041061.

- (257) Aleonard, P. S. Fluorometallates obtenus par dissolution d'oxydes metalliques dans bain fondu a base de fluoroborate de potassium. *Comptes Rendus Hebdomadaires des Seances de l'Academie des Sciences* **1965**, 260, 1977-1980.
- (258) Ebisu, H.; Arakawa, M.; Takeuchi, H. An EPR study of trigonally symmetric Cr<sup>3+</sup> centres in TlZnF<sub>3</sub> single crystals. *Journal of Physics: Condensed Matter* **2005**, 17 (29), 4653, DOI: 10.1088/0953-8984/17/29/008.
- (259) Wang, F. F. Y.; Kestigian, M. Magnetic Properties of RbFeF<sub>3</sub>. *Journal of Applied Physics* **1966**, 37 (3), 975-976, DOI: 10.1063/1.1708546.
- (260) Williamson, R. F.; Boo, W. O. J. Lower valence fluorides of vanadium. 1. Synthesis and characterization of sodium trifluorovanadate, potassium trifluorovanadate, and rubidium trifluorovanadate. *Inorganic Chemistry* **1977**, 16 (3), 646-648, DOI: 10.1021/ic50169a030.
- (261) Petrov, M. P.; Nedlin, G. M. Spin-Density Space Oscillations and Hyperfine Interaction in RbCoF<sub>3</sub>. *Journal of Applied Physics* **1968**, 39 (2), 1012-1014, DOI: 10.1063/1.1656148.
- (262) Daniel, P.; Toulouse, J.; Gesland, J. Y.; Rousseau, M. Raman-scattering investigation of the hexagonal perovskite RbZnF<sub>3</sub>. *Physical Review B* **1995**, 52 (13), 9129-9132, DOI: 10.1103/PhysRevB.52.9129.
- (263) Voloshinovskii, A. V.; Rodnyi, P. A.; Dmitriev, A. G.; Melchakov, E. N.; Pidzyrailo, S. N. Core-valence luminescence of CsMgCl<sub>3</sub> and CsMgF<sub>3</sub> crystals. *Journal of Applied Spectroscopy* **1993**, 59 (1), 560-562, DOI: 10.1007/BF00663370.
- (264) Scatturin, V.; Corliss, L.; Elliott, N.; Hastings, J. Magnetic structures of 3d transition metal double fluorides, KMeF<sub>3</sub>. *Acta Crystallographica* **1961**, 14 (1), 19-26, DOI: 10.1107/S0365110X61000036.
- (265) Knox, K. Perovskite-like fluorides. I. Structures of KMnF<sub>3</sub>, KFeF<sub>3</sub>, KNiF<sub>3</sub> and KZnF<sub>3</sub>. Crystal field effects in the series and in KCrF<sub>3</sub> and KCuF<sub>3</sub>. *Acta Crystallographica* **1961**, 14 (6), 583-585, DOI: 10.1107/S0365110X61001868.
- (266) Cousseins, J. C.; De Kozak, A. Sur les fluorures doubles de chrome bivalent de potassium ou de rubidium. *Comptes Rendus des Seances de l'Academie des Sciences, Serie C: Sciences Chimiques* **1966**, 263 (25), 1533-1535.
- (267) Bachmann, B.; Müller, B. G. Einkristalluntersuchungen an Fluoroperowskiten MPdF<sub>3</sub> (M = Rb, K) und PdF<sub>2</sub>. *Zeitschrift für anorganische und allgemeine Chemie* **1993**, 619 (2), 387-391, DOI: 10.1002/zaac.19936190225.
- (268) Teaney, D. T.; Freiser, M. J.; Stevenson, R. W. H. Discovery of a Simple Cubic Antiferromagnet: Antiferromagnetic Resonance in RbMnF<sub>3</sub>. *Physical Review Letters* **1962**, 9 (5), 212-214, DOI: 10.1103/PhysRevLett.9.212.
- (269) Eastman, D. E.; Shafer, M. W. Antiferromagnetic Resonance in Cubic TiMnF<sub>3</sub>. *Journal of Applied Physics* **2004**, 38 (3), 1274-1276, DOI: 10.1063/1.1709576.
- (270) Alter, E.; Hoppe, R. Über Fluoropalladate(II): KPdF<sub>3</sub>, RbPdF<sub>3</sub>, TIPdF<sub>3</sub> und K<sub>2</sub>PdF<sub>4</sub>. *Zeitschrift für anorganische und allgemeine Chemie* **1974**, 408 (2), 115-120, DOI: 10.1002/zaac.19744080205.
- (271) Popov, A. I.; Kiselev, Y. M. ChemInform Abstract: Synthesis and Characterization of the Higher Fluorides of Silver and Alkali Metals. *ChemInform* **1988**, 19 (27), DOI: 10.1002/chin.198827039.
- (272) Hidaka, M.; Hosogi, S. The crystal structure of KCdF<sub>3</sub>. *J. Phys. France* **1982**, 43 (8), 1227-1232, DOI: 10.1051/jphys:019820043080122700.

- (273) Longo, J. M.; Kafalas, J. A.; O'Connor, J. R.; Goodenough, J. B. Magnetic and Optical Properties of the High- and Low-Pressure Forms of CsCoF<sub>3</sub>. *Journal of Applied Physics* **1970**, *41* (3), 935-936, DOI: 10.1063/1.1659031.
- (274) Bulou, A.; Nouet, J.; Hewat, A. W.; Schäfer, F. J. Structural phase transitions in KCaF<sub>3</sub> - DSC, birefringence and neutron powder diffraction results. *Ferroelectrics* **1980**, *25* (1), 375-378, DOI: 10.1080/00150198008207024.
- (275) Wu, G.-Q.; Hoppe, R. Neue Fluoro-Perowskite zweiwertiger Lanthaniden. Zur Kenntnis von CsEuF<sub>3</sub>, CsYbF<sub>3</sub> und RbYbF<sub>3</sub>. *Zeitschrift für anorganische und allgemeine Chemie* **1983**, *504* (9), 55-59, DOI: 10.1002/zaac.19835040907.
- (276) Alam, M. S.; Saiduzzaman, M.; Biswas, A.; Ahmed, T.; Sultana, A.; Hossain, K. M. Tuning band gap and enhancing optical functions of AGeF<sub>3</sub> (A = K, Rb) under pressure for improved optoelectronic applications. *Scientific Reports* **2022**, *12* (1), 8663, DOI: 10.1038/s41598-022-12713-4.
- (277) Muetterties, E. L. Chemistry of the Difluorides of Germanium and Tin. *Inorganic Chemistry* **1962**, *1* (2), 342-345, DOI: 10.1021/ic50002a029.
- (278) Rousseau, M.; Gesland, J. Y.; Julliard, J.; Nouet, J.; Zarembowitch, J.; Zarembowitch, A. Changement de phase structural dans RbCdF<sub>3</sub> et TlCdF<sub>3</sub>. *J. Physique Lett.* **1975**, *36* (5), 121-124, DOI: 10.1051/jphyslet:01975003605012100.
- (279) Steiner, M.; Krüger, W.; Babel, D. Proof of ferromagnetic chains in CsNiF<sub>3</sub> by neutron diffraction. *Solid State Communications* **1971**, *9* (3), 227-229, DOI: 10.1016/0038-1098(71)90123-2.
- (280) Jex, H.; Maetz, J.; Müllner, M. Cubic-to-tetragonal phase transition in RbCaF<sub>3</sub> investigated by diffraction experiments with neutrons, x rays, and  $\gamma$  rays from a Mössbauer source. *Physical Review B* **1980**, *21* (3), 1209-1218, DOI: 10.1103/PhysRevB.21.1209.
- (281) Odenthal, R. H.; Hoppe, R. Fluorargentate(II) der Alkalimetalle. *Monatshefte für Chemie / Chemical Monthly* **1971**, *102* (5), 1340-1350, DOI: 10.1007/BF00917190.
- (282) Hebecker, C. Neue ternäre Fluoride mit einwertigem Thallium und Silber als Kationen. *Naturwissenschaften* **1973**, *60* (3), 154-154, DOI: 10.1007/BF00594787.
- (283) Pilia, G.; Balachandran, P. V.; Kim, C.; Lookman, T. Finding New Perovskite Halides via Machine Learning. *Frontiers in Materials* **2016**, *3*, DOI: 10.3389/fmats.2016.00019.
- (284) Dance, J.-M.; Kerkouri, N.; Soubeyroux, J.-L.; Darriet, J.; Tressaud, A. Cationic substitutions in fluorides of hexagonal perovskite type. III. The CsNi<sub>1-x</sub>Cd<sub>x</sub>F<sub>3</sub> system: Crystal chemistry and trimeric magnetic interactions in CsNi<sub>3/4</sub>Cd<sub>1/4</sub>F<sub>3</sub>. *Materials Letters* **1982**, *1* (2), 49-52, DOI: 10.1016/0167-577X(82)90004-0.
- (285) Steinfink, H.; Brunton, G. D. The crystal structure of CsBeF<sub>3</sub>. *Acta Crystallographica Section B* **1968**, *24* (6), 807-810, DOI: 10.1107/S0567740868003225.
- (286) Hoppe, R.; Homann, R. Über CsHgF<sub>3</sub>, RbHgF<sub>3</sub> und KHgF<sub>3</sub>. *Zeitschrift für anorganische und allgemeine Chemie* **1969**, *369* (3-6), 212-216, DOI: 10.1002/zaac.19693690312.
- (287) Gómez-Peralta, J. I.; Bokhimi, X. Ternary halide perovskites for possible optoelectronic applications revealed by Artificial Intelligence and DFT calculations. *Materials Chemistry and Physics* **2021**, *267*, 124710, DOI: 10.1016/j.matchemphys.2021.124710.
- (288) Spector, J.; Villeneuve, G.; Hanebali, L.; Cros, C. NMR Investigations of the Li<sup>+</sup> ion mobility in the double chlorides Li<sub>2</sub>MgCl<sub>4</sub> and LiMgCl<sub>3</sub>. *Materials Letters* **1982**, *1* (2), 43-48, DOI: 10.1016/0167-577X(82)90003-9.

- (289) Cros, C.; Hanebali, L.; Latie', L.; Villeneuve, G. r.; Gang, W. Structure, ionic motion and conductivity in some solid-solutions of the LiCIMCl<sub>2</sub> systems (M=Mg,V,Mn). *Solid State Ionics* **1983**, 9-10, 139-147, DOI: 10.1016/0167-2738(83)90223-0.
- (290) Foulon, J.; Durand, J.; Larbot, A.; Cot, L.; Soufiane, A. Crystal structures of MSnF<sub>3</sub> for M= K, Rb, Tl; ionic mobility. *European Journal of Solid State and Inorganic Chemistry* **1993**, 30, 87-99, DOI: 10.1002/chin.199321003.
- (291) Zhang, J.; Hong, G. Luminescence properties of Ce<sup>3+</sup> in KMF<sub>3</sub> (M=Mg,Ca,Sr,Ba) hosts with perovskite structure. *Journal of Rare Earth Society: English Edition* **1997**, (2), 75-78.
- (292) Weidenborner, J. E.; Bednowitz, A. L. Structures of ferrimagnetic fluorides of ABF<sub>3</sub> type. I. RbNiF<sub>3</sub>. *Acta Crystallographica Section B* **1970**, 26 (10), 1464-1468, DOI: 10.1107/S0567740870004338.
- (293) Wu, G.; Hoppe, R. Zur Kenntnis der Fluoride zweiwertiger Lanthanoide. II. Über die Synthese von MLnF<sub>3</sub> aus MLnF<sub>4</sub>. *Zeitschrift für anorganische und allgemeine Chemie* **1984**, 514 (7), 92-98, DOI: 10.1002/zaac.19845140712.
- (294) Yamane, Y.; Yamada, K.; Inoue, K. Mechanochemical synthesis and order–disorder phase transition in fluoride ion conductor RbPbF<sub>3</sub>. *Solid State Ionics* **2008**, 179 (17), 605-610, DOI: 10.1016/j.ssi.2008.04.022.
- (295) Retuerto, M.; Emge, T.; Hadermann, J.; Stephens, P. W.; Li, M. R.; Yin, Z. P.; Croft, M.; Ignatov, A.; Zhang, S. J.; Yuan, Z.; Jin, C.; Simonson, J. W.; Aronson, M. C.; Pan, A.; Basov, D. N.; Kotliar, G.; Greenblatt, M. Synthesis and Properties of Charge-Ordered Thallium Halide Perovskites, CsTl<sup>+</sup><sub>0.5</sub>Tl<sup>3+</sup><sub>0.5</sub>X<sub>3</sub> (X = F or Cl): Theoretical Precursors for Superconductivity? *Chemistry of Materials* **2013**, 25 (20), 4071-4079, DOI: 10.1021/cm402423x.
- (296) Ashby, E. C.; Smith, R. S.; Goel, A. B. Comparative studies on the addition reactions of the Normant reagent ("CH<sub>3</sub>MgBr" + CuBr) and the new tetrahydrofuran-soluble magnesium methylcuprates MgmCun(CH<sub>3</sub>)<sub>2m+n</sub> with phenylacetylene. *The Journal of Organic Chemistry* **1981**, 46 (25), 5133-5139, DOI: 10.1021/jo00338a013.
- (297) Hönle, W.; Miller, G.; Simon, A. Preparation, crystal structures, and electronic properties of LiGaCl<sub>3</sub> and LiGaI<sub>3</sub>. *Journal of Solid State Chemistry* **1988**, 75 (1), 147-155, DOI: 10.1016/0022-4596(88)90312-X.
- (298) Schmitz-Dumont, O.; Bergerhoff, G.; Hartert, E. Über den Einfluß des Kationenradius auf die Bildungsenergie von Anlagerungsverbindungen. VII. Die Systeme Alkalifluorid/Bleifluorid. *Zeitschrift für anorganische und allgemeine Chemie* **1956**, 283 (1-6), 314-329, DOI: 10.1002/zaac.19562830131.
- (299) Arif, H.; Tahir, M. B.; Sagir, M.; Znaidia, S.; Alrobei, H.; Alzaid, M. First-principles calculations to investigate “H” and “K” doped RbSrF<sub>3</sub> for photovoltaic applications. *Optik* **2022**, 271, 169864, DOI: 10.1016/j.ijleo.2022.169864.
- (300) Klasens, H.; Zalm, P.; Huysman, F. The manganese emission in ABF<sub>3</sub>-compounds. *Philips Research Reports* **1953**, 8, 441-451.
- (301) Sommerdijk, J. L.; Bril, A. Divalent europium luminescence in perovskite-like alkaline-earth alkaline fluorides. *Journal of Luminescence* **1976**, 11 (5), 363-367, DOI: 10.1016/0022-2313(76)90021-1.
- (302) Fedoseeva, N.; Spevakova, I.; Petrakovskii, G.; Chuev, V.; Petrov, S. Magnetic structure and magnetic field behaviour of NaMnCl<sub>3</sub>. *Journal of Magnetism and Magnetic Materials* **1980**, 15-18, 539-541, DOI: 10.1016/0304-8853(80)91166-X.

- (303) Thao Tran, T.; Shiv Halasyamani, P. Synthesis and characterization of  $\text{ASnF}_3$  ( $\text{A}=\text{Na}^+$ ,  $\text{K}^+$ ,  $\text{Rb}^+$ ,  $\text{Cs}^+$ ). *Journal of Solid State Chemistry* **2014**, *210* (1), 213-218, DOI: 10.1016/j.jssc.2013.11.025.
- (304) Visser, D.; Prodan, A. Disorder in  $\text{KNiCl}_3$  as observed by electron diffraction. *physica status solidi (a)* **1980**, *58* (2), 481-488, DOI: 10.1002/pssa.2210580218.
- (305) Hayatullah; Murtaza, G.; Khenata, R.; Mohammad, S.; Naeem, S.; Khalid, M. N.; Manzar, A. Structural, elastic, electronic and optical properties of  $\text{CsMCl}_3$  ( $\text{M}=\text{Zn}$ ,  $\text{Cd}$ ). *Physica B: Condensed Matter* **2013**, *420*, 15-23, DOI: 10.1016/j.physb.2013.03.011.
- (306) Lim, A. R.; Jeong, S.-Y.  $^{133}\text{Cs}$  nuclear magnetic resonance study in  $\text{CsZnCl}_3$  single crystals of perovskite  $\text{ABX}_3$  type. *Physica B: Condensed Matter* **2008**, *403* (18), 3217-3220, DOI: 10.1016/j.physb.2008.04.007.
- (307) Seifert, H.-J.; Klatyk, K. Über die Systeme Alkalimetallchlorid/Chrom(II)-chlorid. *Zeitschrift für anorganische und allgemeine Chemie* **1964**, *334* (3-4), 113-124, DOI: 10.1002/zaac.19643340302.
- (308) Gurewitz, E.; Makovsky, J.; Shaked, H. Neutron-diffraction study of the magnetic structure of  $\text{KFeCl}_3$ . *Physical Review B* **1974**, *9* (3), 1071-1076, DOI: 10.1103/PhysRevB.9.1071.
- (309) Haseda, T.; Wada, N.; Hata, M.; Amaya, K. Spin ordering in a triangular X-Y antiferromagnet :  $\text{CsFeCl}_3$  and  $\text{RbFeCl}_3$ . *Physica B+C* **1981**, *108* (1), 841-842, DOI: 10.1016/0378-4363(81)90725-7.
- (310) Seifert, H.-J.; Klatyk, K. Über die Systeme  $\text{RbCl/FeCl}_2$  und  $\text{CsCl/FeCl}_2$ . *Zeitschrift für anorganische und allgemeine Chemie* **1966**, *342* (1-2), 1-9, DOI: 10.1002/zaac.19663420102.
- (311) Zodkaevitz, A.; Makovsky, J.; Kalman, Z. H. The Preparation and Crystal Structure of  $\text{TlMnCl}_3$ ,  $\text{TlFeCl}_3$ ,  $\text{TlCoCl}_3$  and  $\text{TlNiCl}_3$ . *Israel Journal of Chemistry* **1970**, *8* (5), 755-762, DOI: 10.1002/ijch.197000095.
- (312) Brynestad, J.; Yakel, H. L.; Smith, G. P. Temperature Dependence of the Absorption Spectrum of Nickel(II)-Doped  $\text{KMgCl}_3$  and the Crystal Structure of  $\text{KMgCl}_3$ . *The Journal of Chemical Physics* **2004**, *45* (12), 4652-4664, DOI: 10.1063/1.1727550.
- (313) Gurewitz, E.; Horowitz, A.; Shaked, H. Magnetic spiral structure of  $\text{KMnCl}_3$ —a neutron-diffraction study. *Physical Review B* **1979**, *20* (11), 4544-4549, DOI: 10.1103/PhysRevB.20.4544.
- (314) Onken, D. R.; Perrodin, D.; Vogel, S. C.; Bourret, E. D.; Moretti, F. The crystal structure of  $\text{TlMgCl}_3$  from 290 K to 725 K. *Acta Crystallographica Section E* **2020**, *76* (11), 1716-1719, DOI: 10.1107/S2056989020013201.
- (315) Asmussen, R. W.; Larsen, T. K.; Soling, H. The crystal structure of  $\text{RbNiCl}_3$  and  $\text{RbNiBr}_3$ . The Weiss constant in relation to the crystal structure of some double halides of the type  $\text{ANiX}_3$ . *Acta Chemica Scandinavica* **1969**, *23*, 2055-2060, DOI: 10.3891/acta.chem.scand.23-2055.
- (316) Jongen, L.; Gloger, T.; Beekhuizen, J.; Meyer, G. Divalent Titanium: The Halides  $\text{ATiX}_3$  ( $\text{A} = \text{K}$ ,  $\text{Rb}$ ,  $\text{Cs}$ ;  $\text{X} = \text{Cl}$ ,  $\text{Br}$ ,  $\text{I}$ ). *Zeitschrift für anorganische und allgemeine Chemie* **2005**, *631* (2-3), 582-586, DOI: 10.1002/zaac.200400464.
- (317) Engberg, Å.; Soling, H. On the crystal structures of  $\text{RbCoCl}_3$  and  $\text{Rb}_3\text{CoCl}_5$ . *Acta Chemica Scandinavica* **1967**, *21*, 168-174, DOI: 10.3891/acta.chem.scand.21-0168.
- (318) Scholten, M.; Dronskowski, R.; Jacobs, H.  $\text{InCrBr}_3$ : A Ternary Indium Bromide Containing Jahn–Teller Unstable  $\text{Cr}^{2+}$  and the Magnetic Structures of  $\text{InCrBr}_3$  and  $\text{InFeBr}_3$ . *Inorganic Chemistry* **1999**, *38* (11), 2614-2620, DOI: 10.1021/ic981383t.

- (319) Narsimlu, N.; Srinivasu, D.; Sastry, G. S. Study of optical and transport properties of  $K_2CuCl_4 \cdot 2H_2O$  single crystal. *Crystal Research and Technology* **1994**, *29* (4), 577-582, DOI: 10.1002/crat.2170290423.
- (320) Willett, R. D.; Dwiggin, C., Jr.; Kruh, R. F.; Rundle, R. E. Crystal Structures of  $KCuCl_3$  and  $NH_4CuCl_3$ . *The Journal of Chemical Physics* **2004**, *38* (10), 2429-2436, DOI: 10.1063/1.1733520.
- (321) Horowitz, A.; Amit, M.; Makovsky, J.; Dor, L. B.; Kalman, Z. H. Structure types and phase transformations in  $KMnCl_3$  and  $TlMnCl_3$ . *Journal of Solid State Chemistry* **1982**, *43* (2), 107-125, DOI: 10.1016/0022-4596(82)90220-1.
- (322) Seifert, H.-J.; Ehrlich, P. Über die Systeme  $NaCl/VCl_2$ ,  $KCl/VCl_2$  und  $CsCl/VCl_2$ . *Zeitschrift für anorganische und allgemeine Chemie* **1960**, *302* (5-6), 284-288, DOI: 10.1002/zaac.19603020506.
- (323) Meyer, G.; Packruhn, U. Chlorotitanate(II):  $RbTiCl_3$  und  $CsTiCl_3$ . *Zeitschrift für anorganische und allgemeine Chemie* **1985**, *524* (5), 90-94, DOI: 10.1002/zaac.19855240512.
- (324) Rüegg, C.; Cavadini, N.; Furrer, A.; Güdel, H. U.; Krämer, K.; Mutka, H.; Wildes, A.; Habicht, K.; Vorderwisch, P. Bose-Einstein condensation of the triplet states in the magnetic insulator  $TiCuCl_3$ . *Nature* **2003**, *423* (6935), 62-65, DOI: 10.1038/nature01617.
- (325) Niel, M.; Cros, C.; Le Flem, G.; Pouchard, M. Sur les chlorures doubles de vanadium+II: les phases  $TiVCl_3$  et  $NH_4VCl_3$ . *Comptes rendus de l'Académie des Sciences* **1975**, *280* (17), 1093-1095.
- (326) Devaney, K. O.; Freedman, M. R.; McPherson, G. L.; Atwood, J. L. Electron paramagnetic resonance studies of manganese(II) and nickel(II) in three structural phases of rubidium magnesium chloride and the crystal structure of 6H-rubidium magnesium chloride. *Inorganic Chemistry* **1981**, *20* (1), 140-145, DOI: 10.1021/ic50215a030.
- (327) Fedoseeva, N. V.; Velikanova, T. A.; Zvegintsev, A. G. High-pressure cubic phase of  $RbMnCl_3$  - magnetic properties. *physica status solidi (a)* **1979**, *51* (1), K93-K96, DOI: 10.1002/pssa.2210510157.
- (328) Seifert, H.-J.; Fink, H.; Thiel, G.; Uebach, J. Thermodynamische und strukturelle Untersuchungen an den Verbindungen der Systeme  $KCl/MCl_2$  ( $M = Ca, Cd, Co, Ni$ ). *Zeitschrift für anorganische und allgemeine Chemie* **1985**, *520* (1), 151-159, DOI: 10.1002/zaac.19855200118.
- (329) Harada, M. Jahn-Teller Phase Transitions in  $RbCuCl_3$ . *Journal of the Physical Society of Japan* **1983**, *52* (5), 1646-1657, DOI: 10.1143/JPSJ.52.1646.
- (330) Spitsyn, V. I.; Kryuchkov, S. V.; Grigoriev, M. S.; Kuzina, A. F. Polynuclear Clusters of Technetium. Part 1. Synthesis, Crystal and Molecular Structure of Bromide Octanuclear Prismatic and Hexanuclear Octahedral Clusters of Technetium. *Doklady Akademii Nauk SSSR* **1988**, *288*, 389-393, DOI: 10.1002/chin.198849036.
- (331) Hauser, A.; Falk, U.; Fischer, P.; Furrer, A.; Güdel, H. U. Neutron scattering investigation of 1D and 3D magnetic ordering and excitations in  $AVX_3$  ( $A = Rb, Cs$ ;  $X = Cl, Br, I$ ). *Journal of Magnetism and Magnetic Materials* **1983**, *31-34*, 1139-1140, DOI: 10.1016/0304-8853(83)90832-6.
- (332) Filip, M. R.; Giustino, F. Computational Screening of Homovalent Lead Substitution in Organic-Inorganic Halide Perovskites. *The Journal of Physical Chemistry C* **2016**, *120* (1), 166-173, DOI: 10.1021/acs.jpcc.5b11845.



- (333) Minkiewicz, V. J.; Cox, D. E.; Shirane, G. The magnetic structures of  $\text{RbNiCl}_3$  and  $\text{CsNiCl}_3$ . *Solid State Communications* **1970**, *8* (12), 1001-1005, DOI: 10.1016/0038-1098(70)90505-3.
- (334) Achiwa, N. Linear Antiferromagnetic Chains in Hexagonal  $\text{ABCl}_3$ -Type Compounds (A; Cs, or Rb, B; Cu, Ni, Co, or Fe). *Journal of the Physical Society of Japan* **1969**, *27* (3), 561-574, DOI: 10.1143/JPSJ.27.561.
- (335) Crama, W. J. On the cooperative Jahn-Teller effect in ternary chromium(II) and copper(II) halides. Ph.D. Rijksuniversiteit Leiden (Netherlands), 1980.
- (336) Ewald, B.; Kudla, C.; Heines, P.; Keller, H.-L.; Lathe, C. Investigation of the group subgroup transition in  $\text{AgPbBr}_3$ . **2002**, 2.
- (337) Kovalenko, E. N.; Yunakova, O. N.; Yunakov, N. N. The exciton absorption spectrum of thin films of ternary compounds in the  $\text{AgBr-PbBr}_2$  system. *Low Temperature Physics* **2018**, *44* (8), 856-859, DOI: 10.1063/1.5049171.
- (338) Jouini, N.; Guen, L.; Tournoux, M. Structure de  $\text{TlFeBr}_3$ : Distorsion du type perovskite hexagonale 2L. *Materials Research Bulletin* **1982**, *17* (11), 1421-1427, DOI: 10.1016/0025-5408(82)90228-8.
- (339) Bogdanova, A. V.; Zaslavskaya, N. P.; Sinichka, E. V.; Fedyna, M. F.; Mokra, I. R.; Gasinets, S. M. Synthesis and Crystal Structure of Compounds  $\text{TlCdCl}_3$  and  $\text{TlCdBr}_3$ . *Inorganic Materials (translated from Neorganicheskie Materialy)* **1993**, *29*, 664-666, DOI: 10.1002/chin.199346021.
- (340) Witteveen, H. T.; Veen, J. A. R. v. Magnetic susceptibilities of the compounds  $\text{AFeCl}_3$  (A= $\text{Tl, Rb, NH}_4, \text{Cs}$ ) with antiferromagnetic linear chains. *The Journal of Chemical Physics* **1973**, *58* (1), 186-191, DOI: 10.1063/1.1678903.
- (341) Weiss, A.; Damm, K. Notizen: Zur Kenntnis des Natrium-trichloromercurats (II)  $\text{Na}(\text{HgCl}_3)$ . Über Quecksilberhalogenide IV. *Zeitschrift für Naturforschung B* **1954**, *9* (1), 82-82, DOI: 10.1515/znB-1954-0116.
- (342) Zhang, J.; Corbett, J. D. Synthesis and structure of The Novel Layered Phase  $\text{CsTi}_2\text{Cl}_7$ . *Zeitschrift für anorganische und allgemeine Chemie* **1990**, *580* (1), 36-44, DOI: 10.1002/zaac.19905800105.
- (343) Seifert, H. J.; Krimmel, T.; Heinemann, W. Über die Systeme  $\text{TlX/MnX}_2$  und  $\text{AgX/MnX}_2$  (X= $\text{Cl, Br, I}$ ). *Journal of thermal analysis* **1974**, *6* (1), 175-182, DOI: 10.1007/BF01911498.
- (344) Hönle, W.; Simon, A. Darstellung und Kristallstrukturen von  $\text{LiGaBr}_4$  und  $\text{LiGaBr}_3$ . *Zeitschrift für Naturforschung B* **1986**, *41* (11), 1391-1398, DOI: 10.1515/znB-1986-1113.
- (345) Natarajan, M.; Secco, E. A. Electrical conductivity and phase transformation studies on the mixed metal halides  $\text{RbCdX}_3$  (X =  $\text{Cl, Br, I}$ ) and  $\text{Cs}_2\text{CuBr}_4$ . *physica status solidi (a)* **1976**, *33* (1), 427-433, DOI: 10.1002/pssa.2210330146.
- (346) Wells, A. F. 332. The crystal structure of  $\text{CsCuCl}_3$  and the crystal chemistry of complex halides  $\text{ABX}_3$ . *Journal of the Chemical Society (Resumed)* **1947**, (0), 1662-1670, DOI: 10.1039/JR9470001662.
- (347) Gurewitz, E.; Shaked, H. Neutron diffraction study of the crystallographic and magnetic structures of potassium tribromoferrate(II). *Acta Crystallographica Section B* **1982**, *38* (11), 2771-2775, DOI: 10.1107/S0567740882009923.
- (348) Seifert, H. J.; Klatyk, K. Das System  $\text{CsCl/CrCl}_2$ . *Naturwissenschaften* **1962**, *49* (23), 539-539, DOI: 10.1007/BF00626806.
- (349) Goodyear, J.; Kennedy, D. J. The crystal structure of  $\text{CsMnCl}_3$ . *Acta Crystallographica Section B* **1973**, *29* (4), 744-748, DOI: 10.1107/S0567740873003286.

- (350) Hirakawa, K.; Yoshizawa, H.; Ubukoshi, K. Magnetic and Neutron Scattering Study of One-Dimensional Heisenberg Antiferromagnet CsVCl<sub>3</sub>. *Journal of the Physical Society of Japan* **1982**, *51* (4), 1119-1122, DOI: 10.1143/JPSJ.51.1119.
- (351) Loef, E. v.; Pandian, L. S.; Kaneshige, N.; Ciampi, G.; Stand, L.; Rutstrom, D.; Tratsiak, Y.; Zhuravleva, M.; Melcher, C.; Shah, K. S. Crystal Growth, Density Functional Theory, and Scintillation Properties of TlCaX<sub>3</sub> (X = Cl, Br, I). *IEEE Transactions on Nuclear Science* **2023**, *70* (7), 1378-1383, DOI: 10.1109/TNS.2023.3258065.
- (352) Kuok, M. H.; Tang, S. H. A Raman Study of KCdBr<sub>3</sub> Single Crystals. *physica status solidi (b)* **1988**, *147* (2), K195-K199, DOI: 10.1002/pssb.2221470261.
- (353) Dronskowski, R. InFeBr<sub>3</sub> and InMnBr<sub>3</sub>: Synthesis, Crystal Structure, Magnetic Properties, and Electronic Structure. *Inorganic Chemistry* **1994**, *33* (25), 5927-5933, DOI: 10.1021/ic00103a047.
- (354) Seifert, H.-J.; Dau, E. Über die Systeme Alkalimetallbromid/Mangan(II)-bromid. *Zeitschrift für anorganische und allgemeine Chemie* **1972**, *391* (3), 302-312, DOI: 10.1002/zaac.19723910311.
- (355) Meyer, G. Neue Chlor-Perowskite mit zweiwertigen Lanthaniden: CsLn<sup>II</sup>Cl<sub>3</sub> (Ln<sup>II</sup> = Sm, Eu, Tm, Yb). *Naturwissenschaften* **1978**, *65* (5), 258-258, DOI: 10.1007/BF00368570.
- (356) Bill, J.; Lerch, K.; Laqua, W. Cs<sub>2</sub>Ag<sup>I</sup>Ag<sup>III</sup>Cl<sub>6</sub>. Eine gemischtvalente Verbindung mit dreiwertigem Silber. *Zeitschrift für anorganische und allgemeine Chemie* **1990**, *589* (1), 7-11, DOI: 10.1002/zaac.19905890102.
- (357) Reshak, A. H.; Kityk, I. V.; Alahmed, Z. A.; Levkovets, S.; Fedorchuk, A. O.; Myronchuk, G.; Plucinski, K. J.; Kamarudin, H.; Auluck, S. Experimental and theoretical investigation of the electronic structure and optical properties of TlHgCl<sub>3</sub> single crystal. *Optical Materials* **2015**, *47*, 445-452, DOI: 10.1016/j.optmat.2015.06.018.
- (358) Schölten, M.; Dronskowski, R. Crystal structure of indium magnesium tribromide, InMgBr<sub>3</sub>. *Zeitschrift für Kristallographie - New Crystal Structures* **1997**, *212* (1), 5-5, DOI: 10.1524/nocrs.1997.212.1.5.
- (359) Meyer, G.; Corbett, J. D. Reduced ternary halides of scandium: RbScX<sub>3</sub> (X = chlorine, bromine) and CsScX<sub>3</sub> (X = chlorine, bromine, iodine). *Inorganic Chemistry* **1981**, *20* (8), 2627-2631, DOI: 10.1021/ic50222a047.
- (360) Huang, S.; Shan, H.; Xuan, W.; Xu, W.; Hu, D.; Zhu, L.; Huang, C.; Sui, W.; Xiao, C.; Zhao, Y.; Qiang, Y.; Gu, X.; Song, J.; Zhou, C. High-Performance Humidity Sensor Based on CsPdBr<sub>3</sub> Nanocrystals for Noncontact Sensing of Hydromechanical Characteristics of Unsaturated Soil. *physica status solidi (RRL) – Rapid Research Letters* **2022**, *16* (6), 2200017, DOI: 10.1002/pssr.202200017.
- (361) Schüpp, B. Präparation und Charakterisierung neuer Halogenopalladate mit besonderem Schwergewicht bezüglich mehrkerniger Halogenopalladatgruppen. Ph.D. Universität Dortmund, 1999.
- (362) Kar, M.; Körzdörfer, T. Computational high throughput screening of inorganic cation based halide perovskites for perovskite only tandem solar cells. *Materials Research Express* **2020**, *7* (5), 055502, DOI: 10.1088/2053-1591/ab8c0d.
- (363) Wittenburg, G. Untersuchungen von Struktur-Eigenschafts-Beziehungen bei Trihalogenometallaten AMX<sub>3</sub> von Germanium(II), Zinn(II) und Blei(II). Ph.D. Universität Freiburg (Breisgau), 2000.

- (364) Takeda, Y.; Shimada, M.; Kanamaru, F.; Koizumi, M. Structure and Properties of CsFeBr<sub>3</sub>. *Journal of the Physical Society of Japan* **1974**, *37* (1), 276-276, DOI: 10.1143/JPSJ.37.276.
- (365) Meyer, G. Reduced ternary rare earth halides: State of the art. *Journal of the Less Common Metals* **1983**, *93* (2), 371-380, DOI: 10.1016/0022-5088(83)90190-X.
- (366) Seifert, H.-J.; Haberhauer, D. Über die Systeme Alkalimetallbromid/Calciumbromid. *Zeitschrift für anorganische und allgemeine Chemie* **1982**, *491* (1), 301-307, DOI: 10.1002/zaac.19824910139.
- (367) Peresh, E. Y.; Lazarev, V. B.; Tsigika, V. V.; Orinchaj, A. V.; Balog, I. S.; Tkachenko, V. I.; Pogojda, I. I. Homogeneity regions, preparation and analysis of single crystals of certain compounds of Cs(Tl)X-Ge(Sn,Pb,Cd)X<sub>2</sub> systems, where X=Cl, Br, I. *Izv Akad Nauk SSSR, Neorg Mater* **1985**, *21* (5), 774-778.
- (368) Pakhomov, V. I.; Goryunov, A. V. On the nature of complex formation in some inorganic halides. *Russian Journal of Inorganic Chemistry* **1993**, *38* (9), 1402-1408.
- (369) Dronskowski, R. Synthesis, Crystal Structure, and Electronic Structure of InCdBr<sub>3</sub>. *Journal of Solid State Chemistry* **1995**, *116* (1), 45-52, DOI: 10.1006/jssc.1995.1180.
- (370) Mahendran, K. H.; Nagaraj, S.; Sridharan, R.; Gnanasekaran, T. Differential scanning calorimetric studies on the phase diagram of the binary LiCl-CaCl<sub>2</sub> system. *Journal of Alloys and Compounds* **2001**, *325* (1), 78-83, DOI: 10.1016/S0925-8388(01)01387-1.
- (371) Demchenko, P.; Khyzhun, O. Y.; Fochuk, P. M.; Levkovets, S. I.; Myronchuk, G. L.; Parasyuk, O. V. Single crystal growth, structure and properties of TlHgBr<sub>3</sub>. *Optical Materials* **2015**, *49*, 94-99, DOI: 10.1016/j.optmat.2015.08.026.
- (372) Huart, J. Étude de trois halogénomercures de thallium. *Bulletin de Minéralogie* **1965**, *88* (1), 65-68, DOI: 10.3406/bulmi.1965.5806.
- (373) Zandbergen, H. W. Neutron powder diffraction and magnetic measurements on TlMnI<sub>3</sub> and TlFeI<sub>3</sub>. *Journal of Solid State Chemistry* **1981**, *37* (2), 189-203, DOI: 10.1016/0022-4596(81)90085-2.
- (374) Seifert, H. J.; Langenbach, U. Thermoanalytische und röntgenographische Untersuchungen an Systemen Alkalichlorid/Calciumchlorid. *Zeitschrift für anorganische und allgemeine Chemie* **1969**, *368* (1-2), 36-43, DOI: 10.1002/zaac.19693680107.
- (375) Hauser, A.; Falk, U.; Fischer, P.; Güdel, H. U. Magnetic order in AVX<sub>3</sub> (A = Rb, Cs, (CD<sub>3</sub>)<sub>4</sub>N; X = Cl, Br, I): A neutron diffraction study. *Journal of Solid State Chemistry* **1985**, *56* (3), 343-354, DOI: 10.1016/0022-4596(85)90184-7.
- (376) Witteveen, H. T.; Van Veen, J. A. R. Magnetic susceptibilities of polycrystalline samples of the compounds ANiCl<sub>3</sub> (A = Rb, NH<sub>4</sub>, Tl, Cs) and ANiBr<sub>3</sub> (A = Rb, Cs). *Journal of Physics and Chemistry of Solids* **1974**, *35* (3), 337-346, DOI: 10.1016/S0022-3697(74)80027-2.
- (377) Lachgar, A.; Dudis, D. S.; Dorhout, P. K.; Corbett, J. D. Synthesis and properties of two novel line phases that contain linear scandium chains, lithium scandium iodide (LiScI<sub>3</sub>) and sodium scandium iodide (Na<sub>0.5</sub>ScI<sub>3</sub>). *Inorganic Chemistry* **1991**, *30* (17), 3321-3326, DOI: 10.1021/ic00017a019.
- (378) Vaills, Y.; Buzaré, J. Y.; Gibaud, A.; Launay, C. X-ray investigations of the cubic to tetragonal phase transition in CsCaCl<sub>3</sub> at T<sub>c</sub> = 95 K. *Solid State Communications* **1986**, *60* (2), 139-141, DOI: 10.1016/0038-1098(86)90546-6.
- (379) Macdonald, M. A.; Mel'chakov, E. N.; Munro, I. H.; Rodnyi, P. A.; Voloshinovskiy, A. S. Radiative core-valence transitions in CsMgCl<sub>3</sub> and CsSrCl<sub>3</sub>. *Journal of Luminescence* **1995**, *65* (1), 19-23, DOI: 10.1016/0022-2313(95)00051-Q.

- (380) Matsushita, N.; Ahsbahr, H.; Hafner, S. S.; Kojima, N. Crystal Structure of Mixed-Valence Gold Compound,  $\text{Cs}_2\text{Au}^{\text{I}}\text{Au}^{\text{III}}\text{Cl}_6$  up to 18 GPa. *The Review of High Pressure Science and Technology* **1998**, *7*, 329-331, DOI: 10.4131/jshpreview.7.329.
- (381) Goodyear, J.; Ali, E. M.; Sutherland, H. H. Rubidium tribromomanganate. *Acta Crystallographica Section B* **1980**, *36* (3), 671-672, DOI: 10.1107/S0567740880004074.
- (382) Li, T.-I.; Stucky, G. D. Exchange interactions in polynuclear transition metal complexes. Structural properties of cesium tribromocuprate(II),  $\text{CsCuBr}_3$ , a strongly coupled copper(II) system. *Inorganic Chemistry* **1973**, *12* (2), 441-445, DOI: 10.1021/ic50120a040.
- (383) Lin, Z.-G.; Tang, L.-C.; Chou, C.-P. Study on mid-IR NLO crystals  $\text{CsGe}(\text{Br}_x\text{Cl}_{1-x})_3$ . *Optical Materials* **2008**, *31* (1), 28-34, DOI: 10.1016/j.optmat.2008.01.004.
- (384) Li, T.-I.; Stucky, G. D. The effect of exchange coupling on the spectra of transition metal ions. The crystal structure and optical spectrum of  $\text{CsCrBr}_3$ . *Acta Crystallographica Section B* **1973**, *29* (7), 1529-1532, DOI: 10.1107/S0567740873004863.
- (385) Messer, D. Die Kristallstruktur von  $\text{RbGeCl}_3$ . *Zeitschrift für Naturforschung B* **1978**, *33* (4), 366-369, DOI: 10.1515/znb-1978-0403.
- (386) Schilling, G.; Meyer, G. Ternäre Bromide und Iodide zweiwertiger Lanthanide und ihre Erdalkali-Analoga vom Typ  $\text{AMX}_3$  und  $\text{AM}_2\text{X}_5$ . *Zeitschrift für anorganische und allgemeine Chemie* **1996**, *622* (5), 759-765, DOI: 10.1002/zaac.19966220502.
- (387) Meyer, G.; Hinz, D. J.; Flörke, U. Crystal structure of caesium titanium tribromide,  $\text{CsTiBr}_3$ . *Zeitschrift für Kristallographie - Crystalline Materials* **1993**, *208* (1-2), 370-371, DOI: 10.1524/zkri.1993.208.12.370.
- (388) Hohnstedt, C.; Meyer, G. Metallothermische Reduktion des Tribromids und -iodids von Dysprosium mit Alkalimetallen. *Zeitschrift für anorganische und allgemeine Chemie* **1993**, *619* (8), 1374-1378, DOI: 10.1002/zaac.19936190809.
- (389) Tumram, P. V.; Kautkar, P. R.; Acharya, S. A.; Moharil, S. V. NIR Emission and  $\text{Eu}^{2+}\text{Nd}^{3+}$  Energy Transfer in  $\text{KSrCl}_3:\text{Eu}^{2+}, \text{Nd}^{3+}$  phosphor. *Materials Today: Proceedings* **2017**, *4* (14), 12582-12585, DOI: 10.1016/j.matpr.2017.10.065.
- (390) Schüpp, B.; Keller, H.-L.  $\text{CsPdCl}_3$  – eine Verbindung mit  $[\text{Pd}_2\text{Cl}_6]$ -Baugruppen und anorganischem Kation. *Zeitschrift für anorganische und allgemeine Chemie* **1999**, *625* (11), 1944-1950, DOI: 10.1002/(SICI)1521-3749(199911)625:11<1944::AID-ZAAC1944>3.0.CO;2-V.
- (391) McCall, K. M.; Friedrich, D.; Chica, D. G.; Cai, W.; Stoumpos, C. C.; Alexander, G. C. B.; Deemyad, S.; Wessels, B. W.; Kanatzidis, M. G. Perovskites with a Twist: Strong  $\text{In}^{1+}$  Off-Centering in the Mixed-Valent  $\text{CsInX}_3$  ( $\text{X} = \text{Cl}, \text{Br}$ ). *Chemistry of Materials* **2019**, *31* (22), 9554-9566, DOI: 10.1021/acs.chemmater.9b04095.
- (392) Fink, H.; Seifert, H.-J. Über die Systeme des Europium(II)- und Strontiumchlorids mit Alkalimetallchloriden und Thalliumchlorid [1]. *Zeitschrift für anorganische und allgemeine Chemie* **1980**, *466* (1), 87-96, DOI: 10.1002/zaac.19804660111.
- (393) Khan, K.; Sahariya, J.; Soni, A. Structural, electronic and optical modeling of perovskite solar materials  $\text{ASnX}_3$  ( $\text{A} = \text{Rb}, \text{K}; \text{X} = \text{Cl}, \text{Br}$ ): First principle investigations. *Materials Chemistry and Physics* **2021**, *262*, 124284, DOI: 10.1016/j.matchemphys.2021.124284.
- (394) Sumio, I.; Yoshihiro, I. The congruent melting compounds in the system  $\text{KCl}-\text{SnCl}_2$ . *Chemistry Letters* **1983**, *12* (12), 1803-1806, DOI: 10.1246/cl.1983.1803.
- (395) McPherson, G. L.; McPherson, A. M.; Atwood, J. L. Structures of  $\text{CsMgBr}_3$ ,  $\text{CsCdBr}_3$  and  $\text{CsMgI}_3$ — diamagnetic linear chain lattices. *Journal of Physics and Chemistry of Solids* **1980**, *41* (5), 495-499, DOI: 10.1016/0022-3697(80)90180-8.

- (396) Ch'ih-fa, L.; Morozov, L. S. Thermal and tensimetric investigation of systems formed by tin(II) chloride with alkali metal and ammonium chloride. *Zhurnal Neorganicheskoy Khimii* **1963**, *8* (3), 708-711.
- (397) Schilling, G.; Kunert, C.; Schleid, T.; Meyer, G. Metallothermische Reduktion der Tribromide und -iodide von Thulium und Ytterbium mit Alkalimetallen. *Zeitschrift für anorganische und allgemeine Chemie* **1992**, *618* (12), 7-12, DOI: 10.1002/zaac.19926180102.
- (398) Cox, D. E.; Merkert, F. C. The preparation, crystal growth and perfection of double halides of CsNiCl<sub>3</sub> type. *Journal of Crystal Growth* **1972**, *13-14*, 282-284, DOI: 10.1016/0022-0248(72)90170-4.
- (399) Bird, S. R. A.; Donaldson, J. D.; Silver, J. The Mössbauer effect in tin(II) compounds. Part XII. The spectra of the chloro- and bromo-stannates(II). *Journal of the Chemical Society, Dalton Transactions* **1972**, (18), 1950-1953, DOI: 10.1039/DT9720001950.
- (400) Kuznetsova, I. Y.; Kovaleva, I. S.; Fedorov, V. A. Cs<sub>2</sub>CdBr<sub>4</sub>-CsPbBr<sub>3</sub> and CsCdBr<sub>3</sub>-CsPbBr<sub>3</sub> joins of the CdBr<sub>2</sub>-PbBr<sub>2</sub>-CsBr ternary system. *Zhurnal Neorganicheskoy Khimii* **2002**, *47* (6), 1010-1012.
- (401) Huang, J.; Lei, T.; Siron, M.; Zhang, Y.; Yu, S.; Seeler, F.; Dehestani, A.; Quan, L. N.; Schierle-Arndt, K.; Yang, P. Lead-free Cesium Europium Halide Perovskite Nanocrystals. *Nano Letters* **2020**, *20* (5), 3734-3739, DOI: 10.1021/acs.nanolett.0c00692.
- (402) Zandbergen, H. W.; Verschoor, G. C.; IJdo, D. J. W. The structures of thallium cadmium triiodide and dirubidium iron tetraiodide. *Acta Crystallographica Section B* **1979**, *35* (6), 1425-1427, DOI: 10.1107/S0567740879006580.
- (403) Strähle, J.; Gelinek, J.; Kölmel, M. Über den thermischen Abbau einiger Alkalimetall- und Ammoniumhalogenoaurate(III) und die Kristallstruktur der Zersetzungsprodukte Rb<sub>2</sub>Au<sub>2</sub>Br<sub>6</sub>, Rb<sub>3</sub>Au<sub>3</sub>Cl<sub>8</sub> und Au(NH<sub>3</sub>)Cl<sub>3</sub>. *Zeitschrift für anorganische und allgemeine Chemie* **1979**, *456* (1), 241-260, DOI: 10.1002/zaac.19794560125.
- (404) Alexandrov, K. S.; Besnosikov, B. V.; Posdnjakova, L. A. Successive phase transitions in perovskites. II. Structures of distorted phases. *Ferroelectrics* **1976**, *12* (1), 197-198, DOI: 10.1080/00150197608241424.
- (405) Nagaraj, S.; Vishnuvardhan, C. V.; Ghosh, S.; Sridharan, R. Phase diagram study of CaBr<sub>2</sub>-LiBr system using DTA. *Journal of Thermal Analysis and Calorimetry* **2014**, *115* (2), 1835-1839, DOI: 10.1007/s10973-013-3507-3.
- (406) Matsushita, N.; Fukuhara, F.; Kojima, N. A three-dimensional bromo-bridged mixed-valence gold(I,III) compound, Cs<sub>2</sub>Au<sup>I</sup>Au<sup>III</sup>Br<sub>6</sub>. *Acta Crystallographica Section E* **2005**, *61* (6), i123-i125, DOI: 10.1107/S1600536805016594.
- (407) Beck, H. P.; Tratzky, H.; Kallmayer, V.; Stöwe, K. The InSnCl<sub>3</sub>-Type Arrangement: I. A New ABX<sub>3</sub> Structure Type with Close Cation-Cation Contacts. *Journal of Solid State Chemistry* **1999**, *146* (2), 344-350, DOI: 10.1006/jssc.1999.8360.
- (408) Lv, S.; Wu, Q.; Meng, X.; Kang, L.; Zhong, C.; Lin, Z.; Hu, Z.; Chen, X.; Qin, J. A promising new nonlinear optical crystal with high laser damage threshold for application in the IR region: synthesis, crystal structure and properties of noncentrosymmetric CsHgBr<sub>3</sub>. *Journal of Materials Chemistry C* **2014**, *2* (33), 6796-6801, DOI: 10.1039/C4TC00565A.
- (409) Scholten, M.; Dronskowski, R.; Staffel, T.; Meyer, G. Synthesis and Crystal Structure of Potassium Indium Tribromide, KInBr<sub>3</sub>. *Zeitschrift für anorganische und allgemeine Chemie* **1998**, *624* (11), 1741-1745, DOI: 10.1002/(SICI)1521-3749(1998110)624:11<1741::AID-ZAAC1741>3.0.CO;2-W.

- (410) Kuok, M. H.; Tan, L. S.; Shen, Z. X.; Huan, C. H.; Mok, K. F. A Raman study of RbSnBr<sub>3</sub>. *Solid State Communications* **1996**, *97* (6), 497-501, DOI: 10.1016/0038-1098(95)00625-7.
- (411) Tang, L. C.; Huang, J. Y.; Chang, C. S.; Lee, M. H.; Liu, L. Q. New infrared nonlinear optical crystal CsGeBr<sub>3</sub>: synthesis, structure and powder second-harmonic generation properties. *Journal of Physics: Condensed Matter* **2005**, *17* (46), 7275, DOI: 10.1088/0953-8984/17/46/011.
- (412) Thiele, G.; Rotter, H. W.; Schmidt, K. D. Die Kristallstrukturen und Phasentransformationen von RbGeBr<sub>3</sub>. *Zeitschrift für anorganische und allgemeine Chemie* **1988**, *559* (1), 7-16, DOI: 10.1002/zaac.19885590101.
- (413) Li, T.-I.; Stucky, G. D.; McPherson, G. L. The crystal structure of CsMnCl<sub>3</sub> and a summary of the structures of RMX<sub>3</sub> compounds. *Acta Crystallographica Section B* **1973**, *29* (6), 1330-1335, DOI: 10.1107/S0567740873004450.
- (414) Monzel, H.; Schramm, M.; Stöwe, K.; Beck, H. P. Zur Neuuntersuchung des Phasendiagramms RbCl/PbCl<sub>2</sub>. *Zeitschrift für anorganische und allgemeine Chemie* **2000**, *626* (2), 408-411, DOI: 10.1002/(SICI)1521-3749(200002)626:2<408::AID-ZAAC408>3.0.CO;2-A.
- (415) Natarajan, M.; Prakash, B. Phase transitions in ABX<sub>3</sub> type halides. *physica status solidi (a)* **1971**, *4* (3), K167-K172, DOI: 10.1002/pssa.2210040331.
- (416) Sebastian, M.; Peters, J. A.; Stoumpos, C. C.; Im, J.; Kostina, S. S.; Liu, Z.; Kanatzidis, M. G.; Freeman, A. J.; Wessels, B. W. Excitonic emissions and above-band-gap luminescence in the single-crystal perovskite semiconductors CsPbBr<sub>3</sub> and CsPbCl<sub>3</sub>. *Physical Review B* **2015**, *92* (23), 235210, DOI: 10.1103/PhysRevB.92.235210.
- (417) Jouini, N.; Guen, L.; Tournoux, M. Le système TlI-GeI<sub>2</sub> - Structure cristalline de TlGeI<sub>3</sub>. *Annales de Chimie (- Science des Matériaux) (Paris)* **1982**, *7* (1), 45-51.
- (418) Linaburg, M. R. Studies of Halide Perovskites CsPbX<sub>3</sub>, RbPbX<sub>3</sub> (X=Cl<sup>-</sup>, Br<sup>-</sup>, I<sup>-</sup>), and Their Solid Solutions. The Ohio State University, 2015.
- (419) Baopeng, C.; Shihua, W.; Xinhua, Z. Synthesis and structure of AEuI<sub>3</sub> (A=Rb, Cs) and AEuI<sub>5</sub> (A=K, Rb, Cs). *Journal of Alloys and Compounds* **1992**, *181* (1), 511-514, DOI: 10.1016/0925-8388(92)90348-D.
- (420) Idrissi, S.; Mounkachi, O.; Bahmad, L.; Benyoussef, A. Study of the electronic and optoelectronic properties of the perovskite KPbBr<sub>3</sub> by DFT and TDDFT methods. *Computational Condensed Matter* **2022**, *33*, e00617, DOI: 10.1016/j.cocom.2021.e00617.
- (421) Kaladevi, C. Studies on some ternary alkali lead bromide crystals. Ph.D. Manonmaniam Sundaranar University, 2011.
- (422) Zandbergen, H. W. Neutron powder diffraction and magnetic measurements on RbTlI<sub>3</sub>, RbVI<sub>3</sub>, and CsVI<sub>3</sub>. *Journal of Solid State Chemistry* **1981**, *37* (3), 308-317, DOI: 10.1016/0022-4596(81)90492-8.
- (423) Travis, W.; Glover, E. N. K.; Bronstein, H.; Scanlon, D. O.; Palgrave, R. G. On the application of the tolerance factor to inorganic and hybrid halide perovskites: a revised system. *Chemical Science* **2016**, *7* (7), 4548-4556, DOI: 10.1039/C5SC04845A.
- (424) Hoffman, J. B.; Schleper, A. L.; Kamat, P. V. Transformation of Sintered CsPbBr<sub>3</sub> Nanocrystals to Cubic CsPbI<sub>3</sub> and Gradient CsPbBr<sub>x</sub>I<sub>3-x</sub> through Halide Exchange. *Journal of the American Chemical Society* **2016**, *138* (27), 8603-8611, DOI: 10.1021/jacs.6b04661.
- (425) Maity, G.; Pradhan, S. K. Composition related structural transition between mechanosynthesized CsPbBr<sub>3</sub> and CsPb<sub>2</sub>Br<sub>5</sub> perovskites and their optical properties. *Journal of Alloys and Compounds* **2020**, *816*, 152612, DOI: 10.1016/j.jallcom.2019.152612.

- (426) Paul, M.; Seifert, H. J. EMF-measurements with galvanic bromine cells in the systems RBr/MBr<sub>2</sub> (M= Sr, Ba). *Journal of thermal analysis* **1989**, *35* (2), 585-593, DOI: 10.1007/BF01904460.
- (427) Thiele, G.; Rotter, H. W.; Schmidt, K. D. Die Kristallstrukturen und Phasentransformationen des tetramorphen RbGeI<sub>3</sub>. *Zeitschrift für anorganische und allgemeine Chemie* **1989**, *571* (1), 60-68, DOI: 10.1002/zaac.19895710106.
- (428) Ehrenberg, H.; Fuess, H.; Hesse, S.; Zimmermann, J.; von Seggern, H.; Knapp, M. Structures of CsEuBr<sub>3</sub> and its degradation product Cs<sub>2</sub>EuBr<sub>5</sub>·10H<sub>2</sub>O. *Acta Crystallographica Section B* **2007**, *63* (2), 201-204, DOI: 10.1107/S0108768106049032.
- (429) Bourret-Courchesne, E. D.; Bizarri, G. A.; Borade, R.; Gundiah, G.; Samulon, E. C.; Yan, Z.; Derenzo, S. E. Crystal growth and characterization of alkali-earth halide scintillators. *Journal of Crystal Growth* **2012**, *352* (1), 78-83, DOI: 10.1016/j.jcrysgro.2012.01.014.
- (430) Zhang, J.; Qi, R. Y.; Corbett, J. D. Two novel titanium halide phases: KTi<sub>4</sub>Cl<sub>11</sub> and CsTi<sub>4.3</sub>I<sub>11</sub>. *Inorganic Chemistry* **1991**, *30* (25), 4794-4798, DOI: 10.1021/ic00025a022.
- (431) Seifert, H. J.; Kischka, K. H. Investigations on systems AX/MnX<sub>2</sub> (A = Li-Cs, TI; X = Cl, Br, I) by DTA and X-ray analysis. *Thermochimica Acta* **1978**, *27* (1), 85-93, DOI: 10.1016/0040-6031(78)85023-0.
- (432) Hamideddine, I.; Tahiri, N.; Bounagui, O. E.; Ez-Zahraouy, H. Ab initio study of structural and optical properties of the halide perovskite KBX<sub>3</sub> compound. *Journal of the Korean Ceramic Society* **2022**, *59* (3), 350-358, DOI: 10.1007/s43207-021-00178-6.
- (433) Howie, R. A.; Moser, W.; Starks, R. G.; Woodhams, F. W. D.; Parker, W. Potassium tin(II) sulphate and related tin apatites: Mössbauer and X-ray studies. *Journal of the Chemical Society, Dalton Transactions* **1973**, (14), 1478-1484, DOI: 10.1039/DT9730001478.
- (434) Wang Shi, H.; Zhao, M. Phase diagram of YbI<sub>2</sub>-RbI binary system and structural investigation of RbYbI<sub>3</sub>. *Journal of the Less Common Metals* **1987**, *127*, 219-224, DOI: 10.1016/0022-5088(87)90381-X.
- (435) Khyzhun, O. Y.; Fochuk, P. M.; Kityk, I. V.; Piasecki, M.; Levkovets, S. I.; Fedorchuk, A. O.; Parasyuk, O. V. Single crystal growth and electronic structure of TIPbI<sub>3</sub>. *Materials Chemistry and Physics* **2016**, *172*, 165-172, DOI: 10.1016/j.matchemphys.2016.01.058.
- (436) Lin, W.; He, J.; McCall, K. M.; Stoumpos, C. C.; Liu, Z.; Hadar, I.; Das, S.; Wang, H.-H.; Wang, B.-X.; Chung, D. Y.; Wessels, B. W.; Kanatzidis, M. G. Inorganic Halide Perovskitoid TIPbI<sub>3</sub> for Ionizing Radiation Detection. *Advanced Functional Materials* **2021**, *31* (13), 2006635, DOI: 10.1002/adfm.202006635.
- (437) Hohnstedt, C.; Meyer, G. The first ternary iodides with divalent dysprosium. *Naturwissenschaften* **1991**, *78* (10), 462-463, DOI: 10.1007/BF01134384.
- (438) Marshall, K. P.; Tao, S.; Walker, M.; Cook, D. S.; Lloyd-Hughes, J.; Varagnolo, S.; Wijesekara, A.; Walker, D.; Walton, R. I.; Hatton, R. A. Cs<sub>1-x</sub>Rb<sub>x</sub>SnI<sub>3</sub> light harvesting semiconductors for perovskite photovoltaics. *Materials Chemistry Frontiers* **2018**, *2* (8), 1515-1522, DOI: 10.1039/C8QM00159F.
- (439) Thiele, G.; Serr, B. R. Crystal structure of rubidium triiodostannate(II), RbSnI<sub>3</sub>. *Zeitschrift für Kristallographie - Crystalline Materials* **1995**, *210* (1), 64-64, DOI: 10.1524/zkri.1995.210.1.64.
- (440) Debbichi, L.; Lee, S.; Cho, H.; Rappe, A. M.; Hong, K.-H.; Jang, M. S.; Kim, H. Mixed Valence Perovskite Cs<sub>2</sub>Au<sub>2</sub>I<sub>6</sub>: A Potential Material for Thin-Film Pb-Free Photovoltaic Cells with Ultrahigh Efficiency. *Advanced Materials* **2018**, *30* (12), 1707001, DOI: 10.1002/adma.201707001.

- (441) Kitagawa, H.; Sato, H.; Kojima, N.; Kikegawa, T.; Shimomura, O. Metallization and phase transitions of the three-dimensional halogen-bridge mixed-valence complex  $\text{Cs}_2\text{Au}_2\text{I}_6$  under high pressure. *Solid State Communications* **1991**, *78* (11), 989-995, DOI: 10.1016/0038-1098(91)90220-P.
- (442) Krishnamoorthy, T.; Ding, H.; Yan, C.; Leong, W. L.; Baikie, T.; Zhang, Z.; Sherburne, M.; Li, S.; Asta, M.; Mathews, N.; Mhaisalkar, S. G. Lead-free germanium iodide perovskite materials for photovoltaic applications. *Journal of Materials Chemistry A* **2015**, *3* (47), 23829-23832, DOI: 10.1039/C5TA05741H.
- (443) Haupt, H. J.; Huber, F.; Preut, H. Darstellung und Kristallstruktur von Rubidiumtrijodoplumbat(II). *Zeitschrift für anorganische und allgemeine Chemie* **1974**, *408* (2), 209-213, DOI: 10.1002/zaac.19744080215.
- (444) Jung, M.-H.; Rhim, S. H.; Moon, D.  $\text{TiO}_2/\text{RbPbI}_3$  halide perovskite solar cells. *Solar Energy Materials and Solar Cells* **2017**, *172*, 44-54, DOI: 10.1016/j.solmat.2017.07.011.
- (445) Xie, Y.; Wang, S.; Zhao, X. Phase diagram and structure of  $\text{CsSm}_{(1-x)}\text{Yb}_x\text{I}_3$  systems. *Journal of Alloys and Compounds* **1996**, *241* (1), 40-43, DOI: 10.1016/0925-8388(96)02196-2.
- (446) Li, Y.; Ding, Y.; Li, Y.; Liu, H.; Meng, X.; Cong, Y.; Zhang, J.; Li, X.; Chen, X.; Qin, J. Synthesis, Crystal Structure and Nonlinear Optical Property of  $\text{RbHgI}_3$ . *Crystals* **2017**, *7* (5), 148-11, DOI: 10.3390/cryst7050148.
- (447) Eperon, G. E.; Stranks, S. D.; Menelaou, C.; Johnston, M. B.; Herz, L. M.; Snaith, H. J. Formamidinium lead trihalide: a broadly tunable perovskite for efficient planar heterojunction solar cells. *Energy & Environmental Science* **2014**, *7* (3), 982-988, DOI: 10.1039/C3EE43822H.
- (448) Møller, C. K. *The structure of caesium plumbo iodide  $\text{CsPbI}_3$* , Munksgaard: 1959; Vol. 32, p 18.
- (449) Naskar, A.; Khanal, R.; Choudhury, S. Role of Chemistry and Crystal Structure on the Electronic Defect States in Cs-Based Halide Perovskites. *Materials* **2021**, *14* (4), 1032-13, DOI: 10.3390/ma14041032.
- (450) Riccardi, R.; Sinistri, C.; Campari, G. Y.; Magistris, A. Binary Systems Formed by Alkali Bromides with Barium or Strontium Bromide. *Zeitschrift für Naturforschung A* **1970**, *25* (5), 781-785, DOI: 10.1515/zna-1970-0536.
- (451) Pidzyrajlo, N. S.; Triska, T. V.; Khapko, Z. A. In *Recombination luminescence of  $\text{CsCdI}_3$  monocrystals*, Theses of the 23 all-union conference on luminescence, USSR, USSR, 1976; p 89.
- (452) Kuku, T. A. Structure and ionic conductivity of  $\text{CuCdCl}_3$ . *Solid State Ionics* **1987**, *25* (2), 105-108, DOI: 10.1016/0167-2738(87)90109-3.
- (453) Gallo, N.; Bianco, V. D.; Doronzo, S. Mercury thiocyanate and cadmium iodide complexes with KCNS and KI in methylmethacrylate. *Journal of Inorganic and Nuclear Chemistry* **1972**, *34* (7), 2374-2375, DOI: 10.1016/0022-1902(72)80178-7.
- (454) Nishiwaki, Y.; Iio, K. In *9aSH-2 Dielectricity and magnetism of hexagonal  $\text{RbCoBr}_3$  related substance  $\text{ACoX}_3$  ( $A=\text{K, Tl}$   $B=\text{Cl, Br}$ ) (dielectric, region 10)*, The Physical Society of Japan Lecture Summary Collection, 2002; p 830.
- (455) Boltalin, A. I.; Korenev, Y. M. Reaction between  $\text{KF}$  and  $\text{PbF}_2$  in Solid and Gas Phases. (*Russian*) *Journal of Inorganic Chemistry (translated from Zhurnal Neorganicheskoi Khimii)* **1996**, *41* (6), 924-927.
- (456) Deschene, C. In-Situ Monitoring of Cation and Anion Exchange in Perovskite Nanoparticles for Applications in Catalysis, Sensing, and Batteries. Syracuse University, 2019.



- (457) Sawada, K.; Tanaka, M. Formation of bromo complexes of cobalt(II) in acetic acid. *Journal of Inorganic and Nuclear Chemistry* **1977**, *39* (2), 339-344, DOI: 10.1016/0022-1902(77)80026-2.
- (458) Soubeyroux, J. L.; Cros, C.; Gang, W.; Kanno, R.; Pouchard, M. Neutron diffraction investigation of the cationic distribution in the structure of the spinel-type solid solutions  $\text{Li}_{2-2x}\text{M}_{1+x}\text{Cl}_4$  (M = Mg, V): Correlation with the ionic conductivity and NMR data. *Solid State Ionics* **1985**, *15* (4), 293-300, DOI: 10.1016/0167-2738(85)90132-8.
- (459) Pulcinelli, S. H.; Senegas, J.; Tanguy, B.; Menil, F.; Portier, J. Préparation et étude structurale par ratons X et RMN d'un fluorure de composition  $\text{LiZnF}_3$ . *Rev. chim. minér* **1986**, *23* (2), 238-249.
- (460) Gordo, E.; Chen, G. Z.; Fray, D. J. Toward optimisation of electrolytic reduction of solid chromium oxide to chromium powder in molten chloride salts. *Electrochimica Acta* **2004**, *49* (13), 2195-2208, DOI: 10.1016/j.electacta.2003.12.045.
- (461) Loon, C. J. J.; Ijdo, D. J. W. The crystal structure of  $\text{Na}_6\text{MnCl}_8$  and  $\text{Na}_2\text{Mn}_3\text{Cl}_8$  and some isostructural compounds. *Acta Crystallographica Section B* **1975**, *31* (3), 770-773, DOI: 10.1107/S0567740875003779.
- (462) Li, Q.-J.; Sprouster, D.; Zheng, G.; Neufeind, J. C.; Braatz, A. D.; McFarlane, J.; Olds, D.; Lam, S.; Li, J.; Khaykovich, B. Complex Structure of Molten  $\text{NaCl-CrCl}_3$  Salt: Cr-Cl Octahedral Network and Intermediate-Range Order. *ACS Applied Energy Materials* **2021**, *4* (4), 3044-3056, DOI: 10.1021/acsaem.0c02678.
- (463) Földvári, I.; Voszka, R.; Morlin, Z. The Properties of Ni Ions in  $\text{NaCl}$  Single Crystals. I. Vacuum Ultraviolet, Ionic Conductivity, and X-Ray Diffraction Studies. *physica status solidi (b)* **1978**, *89* (1), 235-240, DOI: 10.1002/pssb.2220890130.
- (464) Komarek, K.; Herasymenko, P. Equilibria between Titanium Metal and Solutions of Titanium Dichloride in Fused Sodium Chloride. *Journal of The Electrochemical Society* **1958**, *105* (4), 216, DOI: 10.1149/1.2428803.
- (465) Dubovoj, P. G. Formation of compounds in the  $\text{RbCl-BeCl}_2$  system. *Ukrainskij Khimicheskij Zhurnal* **1979**, *45* (12), 1234-1235.
- (466) Babel, D. In *Structural chemistry of octahedral fluorocomplexes of the transition elements, Structure and Bonding*, Berlin, Heidelberg, 1967//; Jørgensen, C. K.; Neilands, J. B.; Nyholm, R. S.; Reinen, D.; Williams, R. J. P., Eds. Springer Berlin Heidelberg: Berlin, Heidelberg, 1967; pp 1-87.
- (467) Liang, L.; Wencong, L.; Nianyi, C. On the criteria of formation and lattice distortion of perovskite-type complex halides. *Journal of Physics and Chemistry of Solids* **2004**, *65* (5), 855-860, DOI: 10.1016/j.jpcs.2003.08.021.
- (468) Yanagida, T.; Fujimoto, Y.; Arai, M.; Koshimizu, M.; Kato, T.; Nakauchi, D.; Kawaguchi, N. Comparative studies of scintillation properties of Tl-based crystals. *Sensors and Materials* **2020**, *32* (4), 1351-1356.
- (469) Smith, D. Hindered Rotation of the Ammonium Ion in the Solid State. *Chemical Reviews* **1994**, *94* (6), 1567-1584, DOI: 10.1021/cr00030a005.
- (470) Charpin, P.; Roux, N.; Ehnetmann, J. *Compt. Rend.* **1968**, *267 C*, 484-486.
- (471) Rüdorff, W.; Kandler, J.; Babel, D. Untersuchungen an ternären Fluoriden. I. Struktur, Magnetismus und Reflexionsspektren von Alkali-, Ammonium- und Thallium-Nickel(II)-fluoriden. *Zeitschrift für anorganische und allgemeine Chemie* **1962**, *317* (5-6), 261-287, DOI: 10.1002/zaac.19623170502.

- (472) Meyer, G.; Böhmer, N. Korrosion von Messing und Bronze durch Ammoniumhalogenide. *Zeitschrift für anorganische und allgemeine Chemie* **2000**, *626* (6), 1332-1334, DOI: 10.1002/(SICI)1521-3749(200006)626:6<1332::AID-ZAAC1332>3.0.CO;2-X.
- (473) Troyanov, S. I.; Morozov, I. V.; Korenev, Y. M. The synthesis and crystal structure of ammonium fluorocuprates  $\text{NH}_4\text{CuF}_3$  and  $(\text{NH}_4)_2\text{CuF}_4$ . *Russian journal of inorganic chemistry* **1993**, *38* (6), 909-913, DOI: 10.1002/chin.199352035.
- (474) Portier, M. J.; Tressaud, A.; Dupin, J. L.; de Pape, R. Structures et propriétés magnétiques de quelques composés de formule  $\text{M Fe F}_3$  ( $\text{M} = \text{Na}, \text{K}, \text{Rb}, \text{Cs}, \text{NH}_4, \text{Tl}$ ). *Materials Research Bulletin* **1969**, *4* (1), 45-50, DOI: 10.1016/0025-5408(69)90015-4.
- (475) Kozak, A. d. *Rev. chim. minér* **1971**, *8*, 301-335.
- (476) Hoppe, R.; Liebe, W.; Dähne, W. Über Fluoromanganate der Alkalimetalle. *Zeitschrift für anorganische und allgemeine Chemie* **1961**, *307* (5-6), 276-289, DOI: 10.1002/zaac.19613070507.
- (477) Le Bail, A.; Fourquet, J. L.; Rubín, J.; Palacios, E.; Bartolomé, J.  $\text{NH}_4\text{CdF}_3$ : Structure of the low temperature phase. *Physica B: Condensed Matter* **1990**, *162* (3), 231-236, DOI: 10.1016/0921-4526(90)90017-O.
- (478) Bergerhoff, G.; Goost, L. Ammoniumtrifluorostannat(II). *Acta Crystallographica Section B* **1973**, *29* (3), 632-633, DOI: 10.1107/S0567740873003031.
- (479) Shachar, G.; Makovsky, J.; Shaked, H. Neutron diffraction and magnetic measurements of polycrystalline  $\text{NH}_4\text{MnCl}_3$ . *Solid State Communications* **1971**, *9* (9), 493-495, DOI: 10.1016/0038-1098(71)90131-1.
- (480) Krishnan, V. G.; Dou, S.-q.; Weiss, A. Structure and Bonding of Tribromocadmates,  $\text{ACdBr}_3$ ,  $\text{A} = \text{NH}_4, \text{Rb}, \text{Cs}, \text{CH}_3\text{NH}_3, (\text{CH}_3)_2\text{NH}_2, (\text{CH}_3)_4\text{N}$ ,  $[\text{H}_2\text{NNH}_3]$ , and  $(\text{H}_2\text{N})_3\text{C}$ . An X-ray Diffraction and  $^{79-81}\text{Br}$  NQR Study. *Zeitschrift für Naturforschung A* **1991**, *46* (12), 1063-1082, DOI: 10.1515/zna-1991-1212.
- (481) Rolies, M. M.; De Ranter, C. J. A new investigation of ammonium cadmium chloride. *Acta Crystallographica Section B* **1978**, *34* (10), 3057-3059, DOI: 10.1107/S0567740878010018.
- (482) Das, T.; Di Liberto, G.; Pacchioni, G. Density Functional Theory Estimate of Halide Perovskite Band Gap: When Spin Orbit Coupling Helps. *The Journal of Physical Chemistry C* **2022**, *126* (4), 2184-2198, DOI: 10.1021/acs.jpcc.1c09594.
- (483) Tian, J.; Cordes, D. B.; Quarti, C.; Beljonne, D.; Slawin, A. M. Z.; Zysman-Colman, E.; Morrison, F. D. Stable 6H Organic-Inorganic Hybrid Lead Perovskite and Competitive Formation of 6H and 3C Perovskite Structure with Mixed A Cations. *ACS Applied Energy Materials* **2019**, *2* (8), 5427-5437, DOI: 10.1021/acsaem.9b00419.
- (484) Stoumpos, C. C.; Frazer, L.; Clark, D. J.; Kim, Y. S.; Rhim, S. H.; Freeman, A. J.; Ketterson, J. B.; Jang, J. I.; Kanatzidis, M. G. Hybrid Germanium Iodide Perovskite Semiconductors: Active Lone Pairs, Structural Distortions, Direct and Indirect Energy Gaps, and Strong Nonlinear Optical Properties. *Journal of the American Chemical Society* **2015**, *137* (21), 6804-6819, DOI: 10.1021/jacs.5b01025.
- (485) Huan, T. D.; Tuoc, V. N.; Minh, N. V. Layered structures of organic/inorganic hybrid halide perovskites. *Physical Review B* **2016**, *93* (9), 094105, DOI: 10.1103/PhysRevB.93.094105.
- (486) Yamada, K.; Matsui, T.; Tsuritani, T.; Okuda, T.; Ichiba, S.  $^{127}\text{I}$ -NQR,  $^{119}\text{Sn}$  Mössbauer Effect, and Electrical Conductivity of  $\text{MSnI}_3$  ( $\text{M} = \text{K}, \text{NH}_4, \text{Rb}, \text{Cs}, \text{and } \text{CH}_3\text{NH}_3$ ). *Zeitschrift für Naturforschung A* **1990**, *45* (3-4), 307-312, DOI: 10.1515/zna-1990-3-416.

- (487) Stoumpos, C. C.; Mao, L.; Malliakas, C. D.; Kanatzidis, M. G. Structure–Band Gap Relationships in Hexagonal Polytypes and Low-Dimensional Structures of Hybrid Tin Iodide Perovskites. *Inorganic Chemistry* **2017**, *56* (1), 56-73, DOI: 10.1021/acs.inorgchem.6b02764.
- (488) Belabbas, M.; Marbough, N.; Arbouche, O.; Hussain, A. Optoelectronic properties of the novel perovskite materials  $\text{LiPb}(\text{Cl}:\text{Br}:\text{I})_3$  for enhanced hydrogen production by visible photocatalytic activity: Theoretical prediction based on empirical formulae and DFT. *International Journal of Hydrogen Energy* **2020**, *45* (58), 33466-33477, DOI: 10.1016/j.ijhydene.2020.09.066.
